# Supplementary material for: Genome-wide DNA hypermethylation opposes healing in patients with chronic wounds by impairing epithelial-mesenchymal transition
Source: PubMed Central journal article supplement (PMC9433101; doi:10.1172/jci157279), 2022-09-01
Supplement: jci-132-157279-s169.pdf [file jci-132-157279-s169.pdf]

## Supplemental Methods & Figures

### Genome-Wide DNA Hypermethylation Opposes Healing in Chronic Wound Patients by Impairing Epithelial-to-Mesenchymal Transition

Kanhaiya Singh<sup>1,2,§</sup>, Yashika Rustagi<sup>1</sup>, Ahmed S Abouhashem<sup>1,3</sup>, Saba Tabasum<sup>1,2</sup>, Priyanka Verma<sup>1</sup>, Edward Hernandez<sup>1</sup>, Durba Pal<sup>2,4</sup>, Dolly K Khona<sup>1,2</sup>, Sujit K Mohanty<sup>1</sup>, Manishekhar Kumar<sup>1</sup>, Rajneesh Srivastava<sup>1</sup>, Poornachander R Guda<sup>1</sup>, Sumit S Verma<sup>1</sup>, Sanskruti Mahajan<sup>1</sup>, Jackson A Killian<sup>5</sup>, Logan A Walker<sup>5</sup>, Subhadip Ghatak<sup>1,2</sup>, Shomita S. Mathew-Steiner<sup>1,2</sup>, Kristen E Wanczyk<sup>1</sup>, Sheng Liu<sup>6</sup>, Jun Wan<sup>6</sup>, Pearly Yan<sup>7</sup>, Ralf Bundschuh<sup>5,8,9</sup>, Savita Khanna<sup>1,2</sup>, Gayle M Gordillo<sup>1</sup>, Michael P Murphy<sup>1</sup>, Sashwati Roy<sup>1,2</sup> and Chandan K Sen<sup>1,2,§\*</sup>

<sup>1</sup>Indiana University Health Comprehensive Wound Center, Indiana Center for Regenerative Medicine and Engineering, Department of Surgery, Indiana University School of Medicine, Indianapolis, IN

<sup>2</sup>Department of Surgery, The Ohio State University, OH

<sup>3</sup>Sharkia Clinical Research Department, Ministry of Health, Egypt

<sup>4</sup>Department of Biomedical Engineering, Indian Institute of Technology Ropar, Punjab, India

<sup>5</sup>Department of Physics, The Ohio State University, Columbus, OH

<sup>6</sup>Center for Computational Biology and Bioinformatics (CCBB), Indiana University School of Medicine, Indianapolis, IN

<sup>7</sup>Comprehensive Cancer Center, The Ohio State University, Columbus, OH

<sup>8</sup>Department of Chemistry & Biochemistry, <sup>9</sup>Division of Hematology, The Ohio State University, Columbus, OH

§Corresponding Authors:

Chandan K. Sen, PhD  
975 W Walnut Street, Suite IB-454A  
Indianapolis, IN 46202  
Tel: 317-278-2736  
Email: [cksen@iu.edu](mailto:cksen@iu.edu)

Kanhaiya Singh, PhD  
975 W Walnut Street, Suite IB-444  
Indianapolis, IN 46202  
Tel.: +1 317-278-3411  
E-mail: [kanh@iu.edu](mailto:kanh@iu.edu)

\*Lead contact: Chandan K Sen, PhD, [cksen@iu.edu](mailto:cksen@iu.edu)

## List of antibodies used in this study

Antibodies against DNMT1 (cat. no. ab19905), DNMT3A (cat. no. ab4897), DNMT3B (cat. no. ab2851), TP53 (cat. no. ab26), ADAM17 (cat. no. ab2051 and ab57484), NOTCH1 (cat. no. ab27526), activated NOTCH1 (cat. no. ab8925 and ab52301), TWIST1 (cat. no. ab50581), SMURF1 (cat. no. ab38866), P73 (cat. no. ab40658), SIRT1 (cat. no. ab32441), 5-hydroxymethylcytosine (cat. no. ab214728), Cytokeratin 19 (cat. no. ab15463) and HDAC1 (cat. no. ab19845) were purchased from Abcam, Cambridge, MA. Antibodies against Slug (cat. no. 9585T), Vimentin (cat. no. 5741T), N-cadherin (cat. no. 13116T), 5-methylcytosine (cat. no. 28692S), Zeb1 (cat. no. 3396S), and P63 (cat. no. 4892S) were purchased from Cell Signaling Technology, Inc. Danvers, MA. Antibodies against E-cadherin (cat. no. 13-1900) and Cytokeratin 7 (cat. no. MAI-06315) were purchased from Thermo Fisher Scientific, Waltham, MA. Antibody against HIF-1 alpha (cat. no. NB100) was purchased from Novus Biologicals, LLC, Centennial, CO. Antibody against F4/80 (cat. no. MCA497R) was purchased from Bio-Rad Laboratories, Inc. Hercules, CA. Antibody against CollA2 (cat. no. sc-393573) was purchased from Santa Cruz Biotechnology, Inc. Dallas, TX.

## Dot blot analysis

Dot blot analysis was performed to detect global DNA methylation levels in human UW skin and chronic WE. Genomic DNA was isolated using the QIAamp DNA Mini Kit (cat. no. 51306, Qiagen, Germantown, MD). A total of 500 ng of genomic DNA was denatured with 0.4M NaOH, 25mM EDTA at 95°C for 10 min and then neutralized by adding an equal volume of cold 4 M ammonium acetate (pH 7.0). The denatured DNA were then spotted on a nitrocellulose membrane. The spotted membrane was then washed with 2X SSC buffer and kept in UV transilluminator for auto crosslinking. The membrane was then blocked with 5% non-fat milk in 1X TBST for 1 h and incubated overnight with anti-5mC-anti-rabbit antibody (1:500 dilution) in 1X TBST at 4°C. The following day, the membrane was washed and incubated with a HRP-conjugated anti-rabbit secondary antibody (1:5000) for 2h at room temperature. The membrane was washed, and the images were acquired using HyGLO chemiluminescent detection reagent (Denville Scientific, Metuchen, NJ). 5mc intensity was detected by an Azure c600 Gel Imaging System (Azure Biosystems, Dublin, CA). The dot blot intensity was quantified by ImageJ software (NIH).

**Monolayer scratch cell migration assay:** HaCaT cells were seeded in 12 well plates at a density of  $1.5 \times 10^5$ /mL in DMEM media supplemented with 10%FBS, 1% antibiotic and 4.5g of glucose. After specific pretreatment or transfection, a scratch was created with a 1000  $\mu$ L pipette tip and cells were washed with 1xPBS twice. Three images were captured per well at different locations at 0 hour and 44-hour post-scratching using a light microscope. Wound width was calculated using ImageJ software.

**RNA isolation and quantitative real-time PCR (RT-qPCR).** RNA extraction was done from UW human skin or chronic WE tissue samples or cultured cells using the miRVana kit (Ambion™,

cat. no. AM1560). cDNA preparation was done from mRNA using qScript™ SuperMix (Quanta Biosciences, cat. no. 95048-100). RT-qPCR was done using SYBR green–based chemistry and primers specific for selected genes (**Sup Table S8**). Quantification of gene expression was done using the delta-delta Ct relative quantization method after normalization with 18S.

**Single cell suspension:** Generation of single cell suspension was done as previously reported(1). Briefly, the tissue was chopped into small pieces and subjected to enzymatic dissociation using whole skin dissociation kit (cat. no. 130-101-540) in MACS C Tubes (cat. no. 130-093-237) (Miltenyi Biotec Inc., San Diego, CA). The samples were incubated in a water bath at 37°C for approximately 3 hours. After incubation, the samples were diluted by adding 0.5 mL of cold cell culture medium in order to stop the enzymatic reaction. The C Tubes were then attached to gentleMACS™ Octo dissociator and skin dissociation program was performed. The cell suspension was subjected to a 70 µm pre-Separation Filter in order to remove the debris. RBC lysis was performed using RBC lysis buffer (cat. no. 420301, BioLegend, San Diego, CA).

#### **Single cell RNA seq quality control (QC) and analysis:**

QC parameters for data analyses was done as previously reported(1, 2). Cells expressing more than 15% mitochondrial genes were excluded. Cells with very high total counts (>40,000) and very low counts (<3,000) were excluded. Also, genes that were detected in fewer than 3 cells were excluded. Log normalization for genes values was performed using 10,000 as scaling factor. The top 2000 highly variable genes among the eight samples were chosen for performing canonical correlation analysis to integrate the samples and to identify cells with similar gene expression profiles. Principal component analysis (PCA) was performed and the first 21 principal components were chosen to reduce the data dimensions for the clustering. Cluster five and six were extracted from the whole object and PCA was re-performed using the top 2000 variable genes among cells from clusters five and six only. t-Distributed Stochastic Neighbor Embedding (tSNE) was chosen to reduce the data dimensions to two dimensions. The proportion of cell types positive for selected genes between skin and chronic WE were compared using a Chi-Square test(3). For comparison between myeloid cells between normal skin and chronic WE, Wilcoxon Rank Sum test was used to identify the differentially expressed genes. Genes with adjusted p value < 0.05, log<sub>2</sub>FC ±0.5 and expressed at least in 20% of cells in either chronic WE or normal skin were used for pathways enrichment analysis using Reactome database(4).

**Acute wound analyses:** Acute day 7 wounds and uninjured skin samples single cell RNA seq data (RPKM counts) were retrieved from the Gene Expression Omnibus (GEO) database under accession number GSE137897(5). For downstream analyses, only keratinocyte clusters were isolated. Next, RPKM values were log normalized with 10,000 as a scaling factor. The top 2,000 variable genes among keratinocytes were identified and were used to run PCA. Next, tSNE was performed using the first 20 components. To identify differentially expressed genes, gene expression values were compared between keratinocytes from acute wound skin and uninjured

skin samples. Only genes with expression level of at least 20% in either group were considered for the differential expression analysis. Pathways enrichment was performed using the Reactome database using genes with adjusted p value < 0.05 and  $\log_2FC \pm 0.5$ . The top significant pathways identified to be altered were visualized using Cytoscape software(6).

**Pathway analysis:** The Ingenuity Pathway Analysis database (QIAGEN Inc., Redwood City, CA, [www.qiagen.com/ingenuity](http://www.qiagen.com/ingenuity)) predicts biological networks enriched in the dataset. Significantly differentially regulated genes/DMRs were subjected to functional analysis using IPA as reported by us previously(7-9). The enriched canonical pathways and upstream regulators was obtained using the comparison analysis function in IPA. The heat map or bar plots were used to visualize the upstream regulators and canonical pathways. Correlation of multiple analysis simultaneously (DMRs and DEGs) allowed identification of differentially regulated pathways and upstream regulators. Further, enrichment of Gene Ontology (<http://geneontology.org/>) biological processes and Reactome pathway analysis (<http://www.reactome.org>) was performed via ClueGo app v.2.5.3 (Cytoscape plug-in)(10). Cytoscape application was used for visualization of networks of pathways(6).

**Wounding, digital planimetry and Laser Speckle Imaging (LSI):** Mice were anesthetized using 1.5 percent isoflurane and carbogen (95% O<sub>2</sub> and 5% CO<sub>2</sub>) mixture. The dorsum was shaved, cleaned, and sterilized. A bipedicle flap was developed on the back of the mice by making 30-mm-long full-thickness parallel incisions 10 mm apart as reported previously(11). Full-thickness excisional wounds were developed in the middle of each flap with a 3-mm disposable biopsy punch. In another experiment, monopedicle flap was created on the dorsal skin of the mice by making 30-mm-long full-thickness parallel incisions 10 mm apart. The bottom part of the skin was cut to create a free hanging flap. Flap edges were cauterized. A 0.5 mm silicon sheet was placed under the flap and then sutured to the adjacent skin with 5–0 ethicon silk suture. This Silicon sheet was not placed underneath the flap in murine TNT experiments. Digital images of the wounds were taken on the days as indicated. Perfusion was checked by laser speckle (PeriCam PSI HR System, PeriMed, Sweden) for validation of establishment of ischemia(12, 13). Wound area measurement was done by digital planimetry using Image-J software (NIH), as described previously(12, 13).

**Tissue Nanotransfection 2.0:** The hollow microneedle array was fabricated on a double side polished silicon wafer using a standard semiconductor process in a cleanroom environment as described(14, 15). The wafer was then transferred to another plasma etching system to perform a deep Si etching called the Bosch process, a common semiconductor process to achieve a vertical etching profile with a high aspect ratio until the hollow microneedles were connected to the reservoirs so that the cargo or the plasmid DNA fluid could freely flow from the reservoir to the hollow microchannel. When an electric pulse was applied between the TNT chip and the tissue, the negatively charged plasma DNA would travel from the reservoir to nearby target cells by electrophoresis and enter them by electroporation.

**Flow cytometry analyses:** Single-cell suspensions were generated from the murine skin samples using whole skin dissociation kit (cat. no. 130-101-540) in MACS C Tubes (cat. no. 130-093-237; Miltenyi Biotec Inc., San Diego, CA). The fluorescence and light-scattering properties (forward scatter and side scatter) of the cells were determined by using an BD Accuri™ C6 Plus Flow Cytometer (BD). Signals from cells labeled with conjugated fluorophores were detected (16). Data was analyzed using Accuri C6 Software or FlowJo software. Gates were set manually. Gating strategy for the fluorophores has been shown in respective figures.

**Histology, Immunohistochemistry, and Immunocytochemistry (ICC):** Histology of skin was performed from 10- $\mu$ m-thick paraffin sections after staining with H&E. In order to have consistency in the tissue morphology for different antibodies, serial sections from same tissue blocks were obtained and processed for control and treated samples. Paraffin tissue sections were deparaffinized using xylene and rehydrated using decreasing gradient of ethanol. Antigen retrieval was done using citrate buffer, blocked with 10% NGS and incubated with primary antibodies (dilution 1:100 for DAB staining and 1:200 for fluorescence staining) followed by appropriate fluorescence conjugated secondary antibodies (Alexa 568-tagged  $\alpha$ -rat, 1:200 dilution; Alexa 488-tagged  $\alpha$ -488 rabbit, 1:200 dilution) or HRP conjugated antibodies. For DAB staining, Vectastain Elite ABC Kit (Vector Laboratories, Burlingame, CA) was used as reported (17, 18). Slides were counterstained with hematoxylin. Cells having brown-stained cytoplasm were regarded as positive. Similar staining time and procedure were adopted for all the tissue samples. Images were collected using a Zeiss Axio Scan Z1 and Zeiss LSM 880 microscope guided by Zen blue imaging software (12, 13). IHC images were analyzed using the IHC Profiler (19) algorithm and Image-J software (NIH).

**Western Blot:** Cells or homogenized tissues were harvested using cell lysis buffer (Cell Signaling Tech., MA #9803), sonicated on ice (3 pulses for 3 sec) and centrifuged (14000 g for 20 min at 4°C). The protein estimation in the clear lysates was done using bicinchoninic acid (BCA) assay. Proteins (25-30  $\mu$ g) were separated on 4-12% Bis-Tris Gel/MOPS running buffer (NuPAGE, cat. no. NP0321BOX and NP0001) (45 mins at 200V) using NuPAGE electrophoresis system (Invitrogen). Proteins were transferred to polyvinylidene difluoride membranes (PVDF) (2.15 h at 30V). Membranes were blocked with 5% skim milk in Tris-buffered saline with 0.1% Tween 20 for 1 h at room temperature and incubated with the respective primary antibodies overnight at 4°C (dilution TP53- 1:500; ADAM17- 1:500; activated NOTCH1- 1:500). The following day the membranes were washed and incubated with the corresponding HRP-conjugated secondary antibody (1:2000) for 1h at room temperature. The membranes were washed and the images were acquired using HyGlo chemiluminescent detection reagent (cat. no. E-2500, Thomas Scientific, NJ) and Azure c600 Gel Imaging System by Azure Biosystems (20). Beta-actin and GAPDH were used as loading control. Image J (NIH) software was used for quantification of bands by densitometry analysis.

**Histone acetylation and methylation enzyme-linked immunosorbent (ELISA) assay:** Histones were extracted using the EpiQuick Total Histone Extraction Kit (EpiGentek). Briefly,  $1 \times 10^5$  HaCat cells were seeded in 12 wells, treated with 80  $\mu$ M SAM at 80% confluency for 48 hours before collection using Cell Stripper (Corning). After extraction, histone protein concentration was determined using BCA™ Protein Assay Kit (Pierce, Rockford, IL) and analyzed using the

EpiQuick Total Histone H3 Acetylation Detection Fast Kit (EpiGentek) according to the manufacturer's protocols. Briefly, histone proteins (200ng) were added to the strip wells for 2 hours at room temperature. The wells were then washed and incubated with the secondary Ab-containing solution for 1 hour on rocker. The wells were then developed with the enzyme reaction solution for 5 min before being quenched and measured for absorbance at 450 nm. Histone H3K4 methylation analysis was done using EpiQuik global histone H3K4 methylation assay kit (EpiGentek). Briefly, histone proteins (800ng) were added to the strip wells. Methylated histone H3K4 was detected with a high-affinity antibody, and the ratios and amounts of methylated histone H3K4 were determined with a horseradish peroxidase-conjugated secondary antibody using a color development system. Absorbance was measured at a wavelength of 450 nm.

**RT<sup>2</sup> Profiler human wound healing PCR array:** A sample of 1 µg of total RNA per array plate obtained from each group (vehicle control and SAM treated, 80µM SAM) was used for synthesis of cDNA using RT<sup>2</sup> First Strand kit (Qiagen). qPCR array was conducted using the RT<sup>2</sup> Profiler PCR Arrays (Qiagen); Eighty-four human genes related to wound healing (PAHs-121ZC) were assessed. A 1.5-fold cut-off was used to identify genes differentially expressed (up-regulated or down-regulated genes). Data analysis was performed using the RT<sup>2</sup> Profiler PCR array data analysis (<https://geneglobe.qiagen.com/us/analyze>).

## References:

1. Rustagi Y, Abouhashem AS, Verma P, Verma SS, Hernandez E, Liu S, et al. Endothelial Phospholipase Cgamma2 Improves Outcomes of Diabetic Ischemic Limb Rescue Following VEGF Therapy. *Diabetes*. 2022;71(5):1149-65.
2. Abouhashem AS, Singh K, Azzazy HME, and Sen CK. Is Low Alveolar Type II Cell SOD3 in the Lungs of Elderly Linked to the Observed Severity of COVID-19? *Antioxid Redox Signal*. 2020;33(2):59-65.
3. Hughes TK, Wadsworth MH, 2nd, Gierahn TM, Do T, Weiss D, Andrade PR, et al. Second-Strand Synthesis-Based Massively Parallel scRNA-Seq Reveals Cellular States and Molecular Features of Human Inflammatory Skin Pathologies. *Immunity*. 2020;53(4):878-94 e7.
4. Gillespie M, Jassal B, Stephan R, Milacic M, Rothfels K, Senff-Ribeiro A, et al. The reactome pathway knowledgebase 2022. *Nucleic Acids Res*. 2022;50(D1):D687-D92.
5. Li D, Cheng S, Pei Y, Sommar P, Karner J, Herter EK, et al. Single-Cell Analysis Reveals Major Histocompatibility Complex II-Expressing Keratinocytes in Pressure Ulcers with Worse Healing Outcomes. *J Invest Dermatol*. 2022;142(3 Pt A):705-16.
6. Shannon P, Markiel A, Ozier O, Baliga NS, Wang JT, Ramage D, et al. Cytoscape: a software environment for integrated models of biomolecular interaction networks. *Genome Res*. 2003;13(11):2498-504.
7. Ghosh N, Das A, Biswas N, Gnyawali S, Singh K, Gorain M, et al. Urolithin A augments angiogenic pathways in skeletal muscle by bolstering NAD(+) and SIRT1. *Sci Rep*. 2020;10(1):20184.
8. Wisler JR, Singh K, McCarty AR, Abouhashem ASE, Christman JW, and Sen CK. Proteomic Pathway Analysis of Monocyte-Derived Exosomes during Surgical Sepsis Identifies Immunoregulatory Functions. *Surg Infect (Larchmt)*. 2020;21(2):101-11.

9. Das A, M SEM, Gnyawali SC, Ghatak S, Singh K, Stewart R, et al. Skin Transcriptome of Middle-Aged Women Supplemented With Natural Herbo-mineral Shilajit Shows Induction of Microvascular and Extracellular Matrix Mechanisms. *J Am Coll Nutr.* 2019;38(6):526-36.
10. Bindea G, Mlecnik B, Hackl H, Charoentong P, Tosolini M, Kirilovsky A, et al. ClueGO: a Cytoscape plug-in to decipher functionally grouped gene ontology and pathway annotation networks. *Bioinformatics.* 2009;25(8):1091-3.
11. Biswas S, Roy S, Banerjee J, Hussain SR, Khanna S, Meenakshisundaram G, et al. Hypoxia inducible microRNA 210 attenuates keratinocyte proliferation and impairs closure in a murine model of ischemic wounds. *Proc Natl Acad Sci U S A.* 2010;107(15):6976-81.
12. Singh K, Pal D, Sinha M, Ghatak S, Gnyawali SC, Khanna S, et al. Epigenetic Modification of MicroRNA-200b Contributes to Diabetic Vasculopathy. *Mol Ther.* 2017;25(12):2689-704.
13. Singh K, Sinha M, Pal D, Tabasum S, Gnyawali SC, Khona D, et al. Cutaneous Epithelial to Mesenchymal Transition Activator ZEB1 Regulates Wound Angiogenesis and Closure in a Glycemic Status-Dependent Manner. *Diabetes.* 2019;68(11):2175-90.
14. Zhou X, Brown BA, Siegel AP, El Masry MS, Zeng X, Song W, et al. Exosome-Mediated Crosstalk between Keratinocytes and Macrophages in Cutaneous Wound Healing. *ACS Nano.* 2020;14(10):12732-48.
15. Xuan Y, Ghatak S, Clark A, Li Z, Khanna S, Pak D, et al. Fabrication and use of silicon hollow-needle arrays to achieve tissue nanotransfection in mouse tissue in vivo. *Nat Protoc.* 2021.
16. Sinha M, Sen CK, Singh K, Das A, Ghatak S, Rhea B, et al. Direct conversion of injury-site myeloid cells to fibroblast-like cells of granulation tissue. *Nat Commun.* 2018;9(1):936.
17. Singh K, Agrawal NK, Gupta SK, Mohan G, Chaturvedi S, and Singh K. Increased expression of endosomal members of toll-like receptor family abrogates wound healing in patients with type 2 diabetes mellitus. *Int Wound J.* 2016;13(5):927-35.
18. Singh K, Agrawal NK, Gupta SK, Mohan G, Chaturvedi S, and Singh K. Genetic and epigenetic alterations in Toll like receptor 2 and wound healing impairment in type 2 diabetes patients. *J Diabetes Complications.* 2015;29(2):222-9.
19. Varghese F, Bukhari AB, Malhotra R, and De A. IHC Profiler: an open source plugin for the quantitative evaluation and automated scoring of immunohistochemistry images of human tissue samples. *PLoS One.* 2014;9(5):e96801.
20. Gordillo GM, Biswas A, Singh K, Sen A, Guda PR, Miller C, et al. Mitochondria as Target for Tumor Management of Hemangioendothelioma. *Antioxid Redox Signal.* 2021;34(2):137-53.

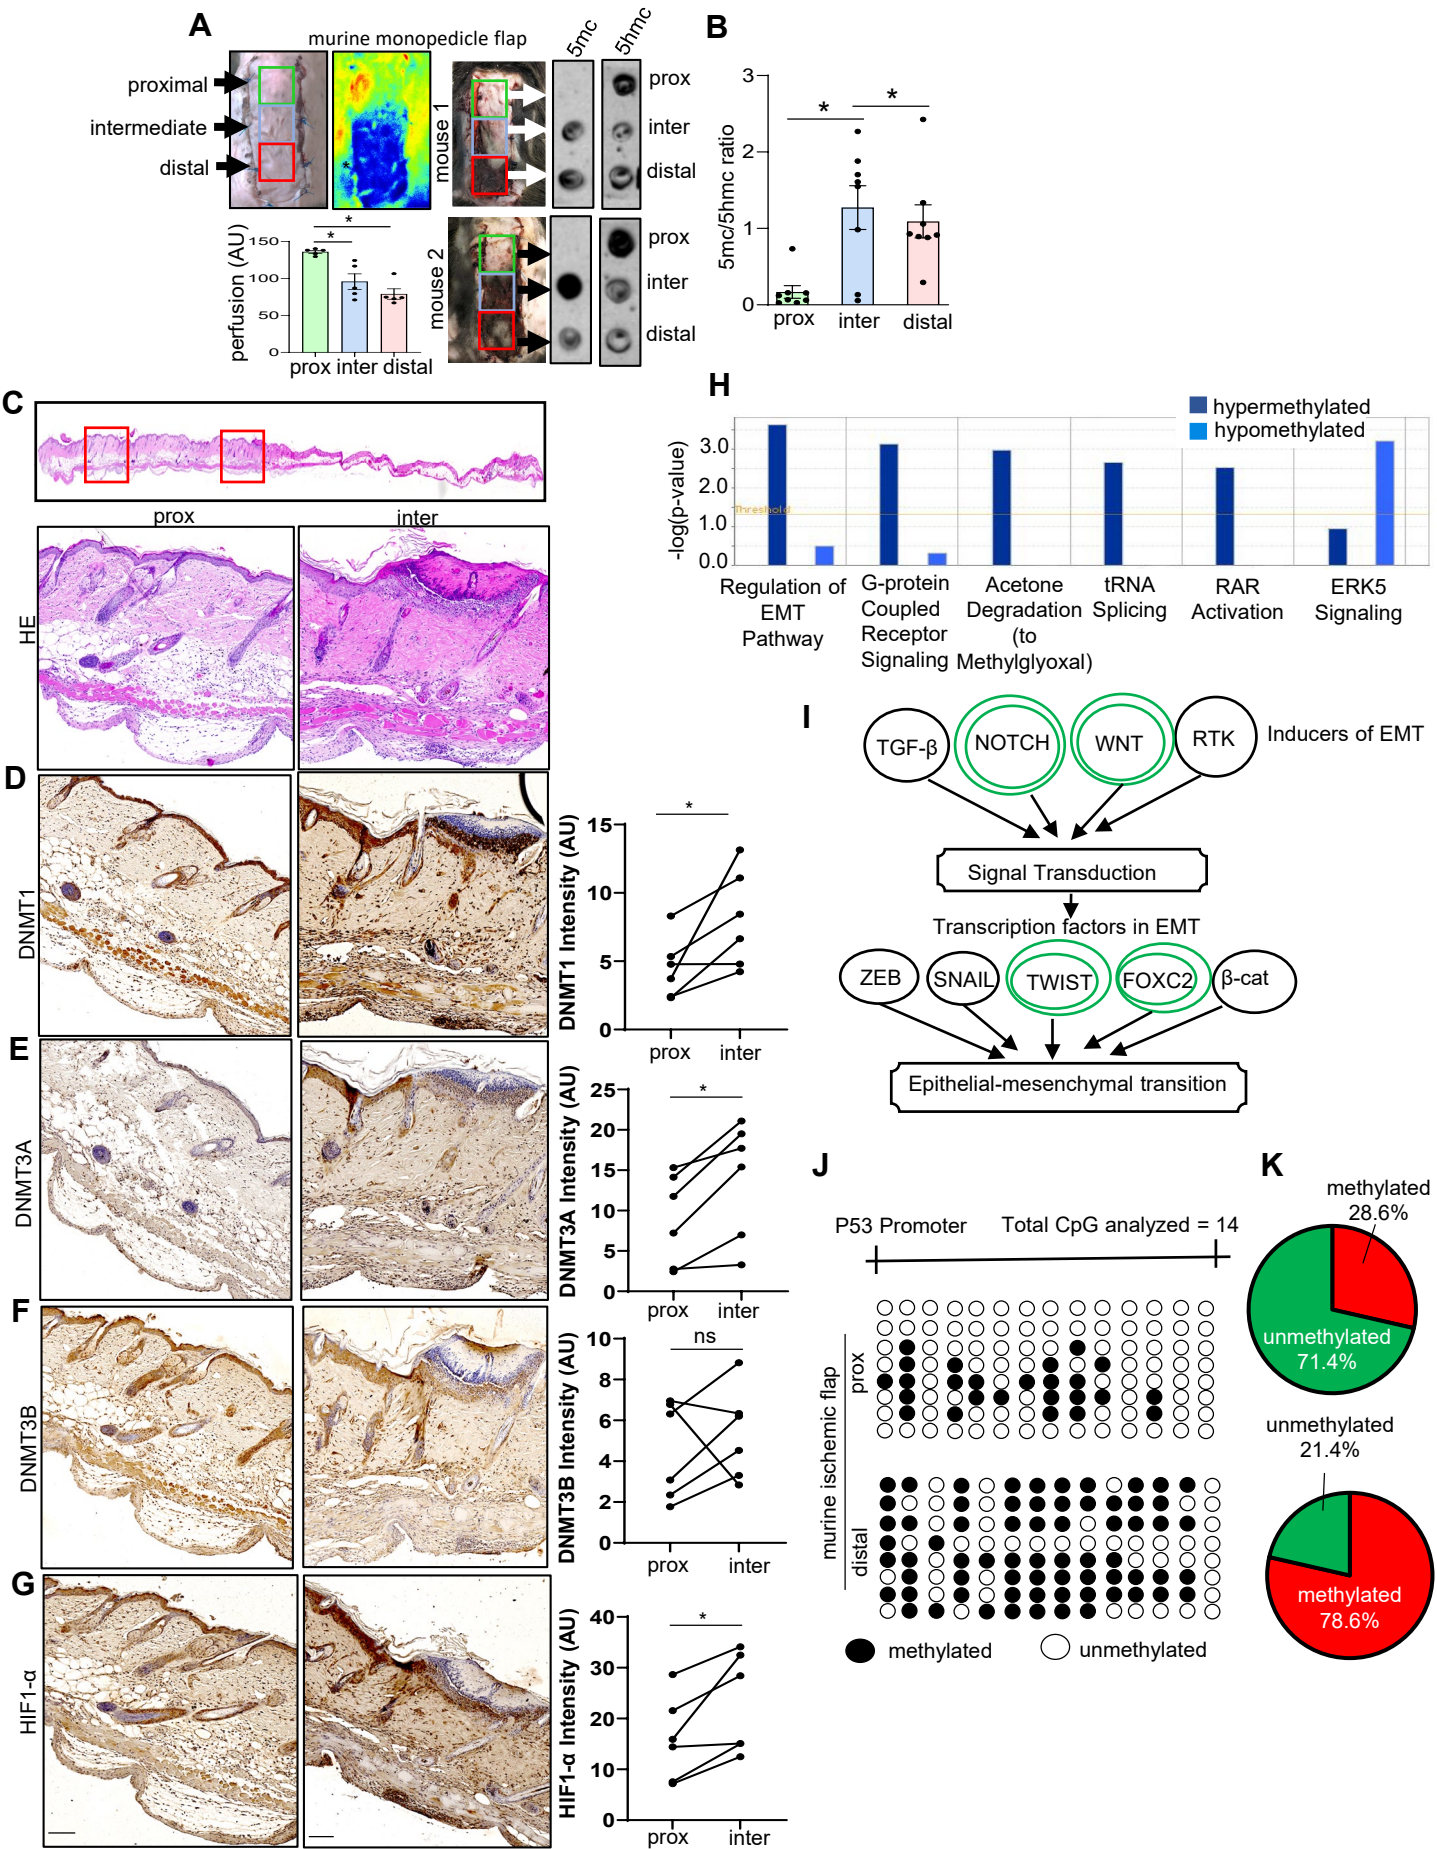



**Supplemental Figure 1. Ischemia induces DNA hypermethylation.** (A) Monopedicle dorsal skin flap experiment showing samples collected from different flap regions. The extent of ischemia was categorically characterized by dividing the flap into three parts {proximal (green box), intermediate (blue box) and distal (red box) from cephalad attachment} in two different mice. The intermediate and distal regions of the flap were less perfused compared to proximal region (perfusion analysis, bottom panel) n=5; \*P<0.05, One-way ANOVA. Dot blot analysis showing levels of 5-methylcytosine (5mc) and 5-hydroxymethylcytosine (5hmc) in different regions of monopedicle flap (proximal, intermediate and distal from cephalad attachment) in two different representative mice. (B) Intensity analysis of 5mc/5hmc ratio in abovementioned different regions of murine monopedicle dorsal skin flap (n=8; \*P<0.05, One-way ANOVA). Data represented as the mean  $\pm$  SEM. (C) Representative Hematoxylin and eosin staining and IHC analysis of DNMT1 (D), DNMT3A (E), DNMT3B (F) and HIF-1 $\alpha$  (G) in paraffin sections from different regions of monopedicle flap (proximal and intermediate from cephalad attachment). Right panels represent the intensity analysis of the images. (Scale = 100 $\mu$ m; n = 6; \*P<0.05, Paired t-test). (H) Canonical Pathway analysis by IPA software showing the top enriched network based on hyper and hypomethylated DMRs in chronic wound samples. (I) IPA canonical pathway (Regulation of the Epithelial-Mesenchymal Transition, EMT) with hypermethylated genes in human chronic WE highlighted in green. Some of the inducers of EMT (NOTCH, WNT), and transcription factors involved in EMT (TWIST and FOXC2) were hypermethylated in chronic WE. (J) Schematic diagram showing the region of murine P53 promoter (mm10\_chr11:69,578,954-69,579,215) analyzed through bisulfite genomic sequencing of DNA isolated from different regions of murine monopedicle dorsal skin flap (proximal and distal from cephalad attachment). Diagrammatic representation of the promoter methylation status has been shown (methylated CpG, black; unmethylated CpG, white). (K) Venn diagram showing the distribution of methylated and unmethylated P53 promoter in different regions of murine monopedicle dorsal skin flap (proximal (**top**) and distal (**bottom**) from cephalad attachment).

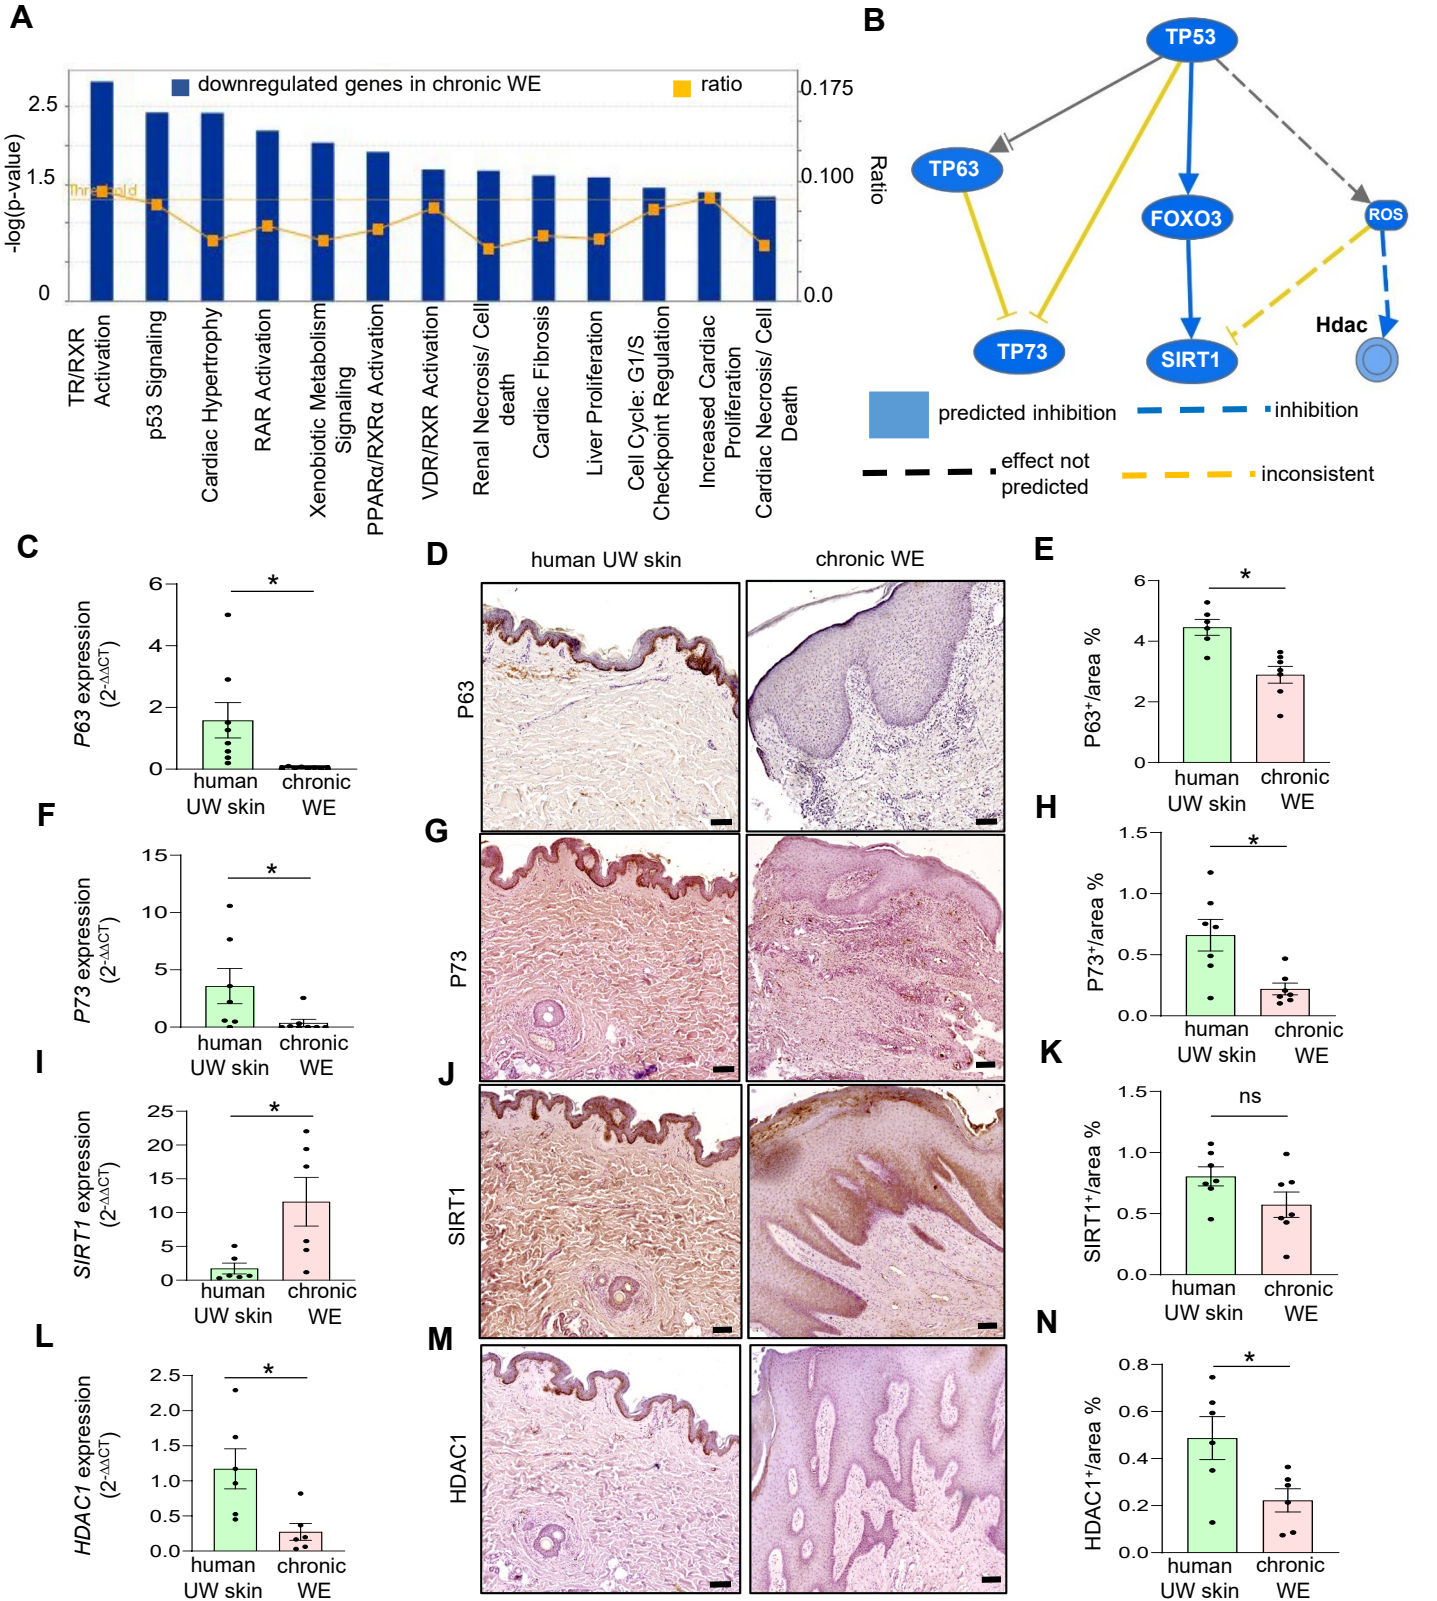

**Supplemental Figure 2.** (A) Toxicological pathway analysis by IPA software showing the top enriched network based on downregulated genes in chronic WE sample. (B) IPA upstream regulator analysis of downregulated genes in chronic WE identified predicted regulators involved in TP53 signaling. (C) qRT-PCR, (D) IHC analysis of P63 and (E) intensity analysis of the images. (F) qRT-PCR, (G) IHC analysis of P73 and (H) intensity analysis of the images. (I) qRT-PCR, (J) IHC analysis of SIRT1 and (K) intensity analysis of the images. (L) qRT-PCR, (M) IHC analysis of HDAC1 and (N) intensity analysis of the images. (Scale = 100 $\mu$ m; n = 5-8; \*P<0.05, Student's t-test). Data represented as the mean  $\pm$  SEM.

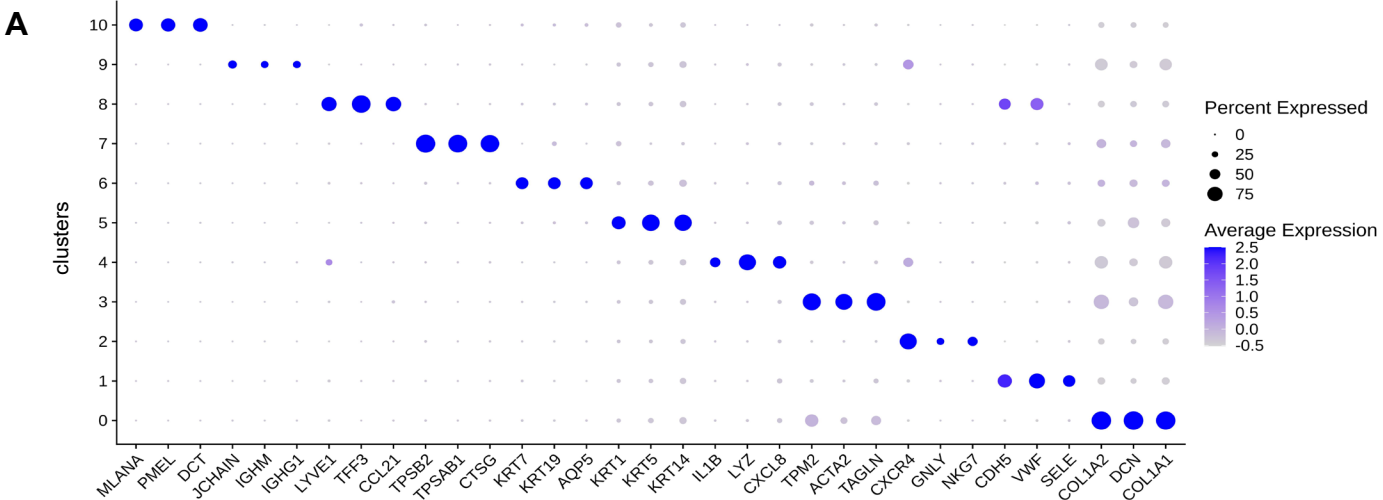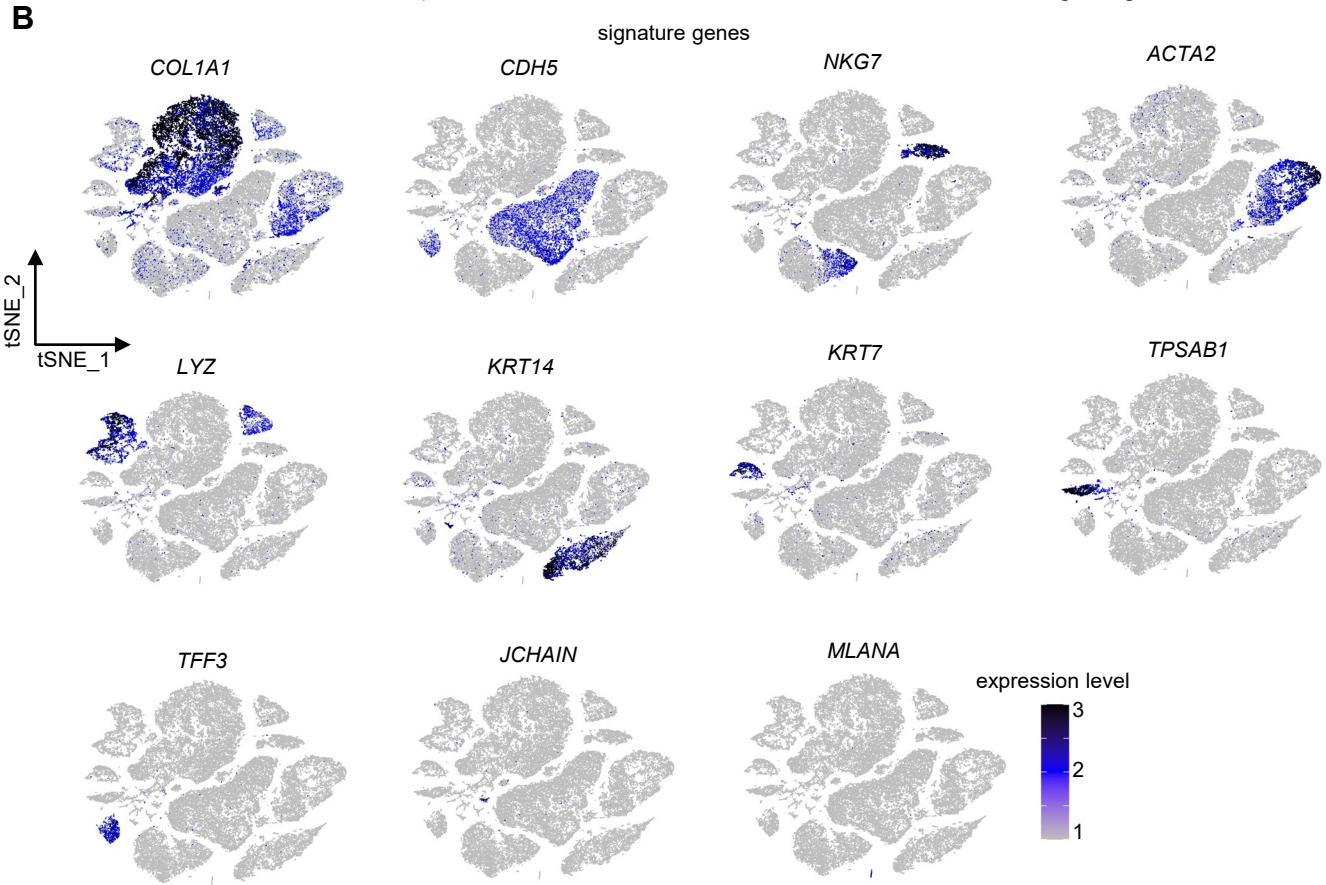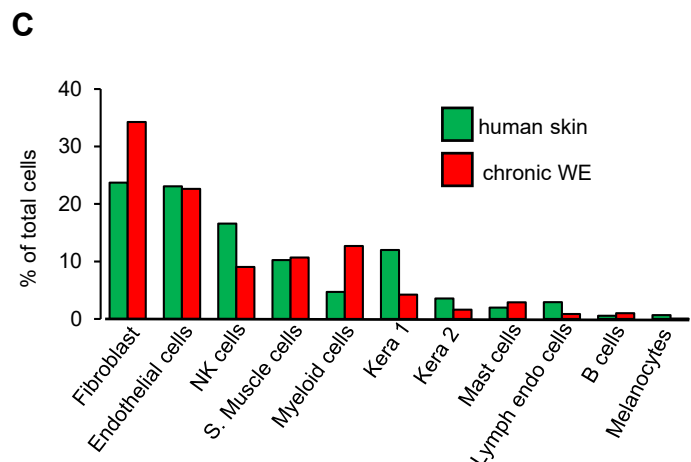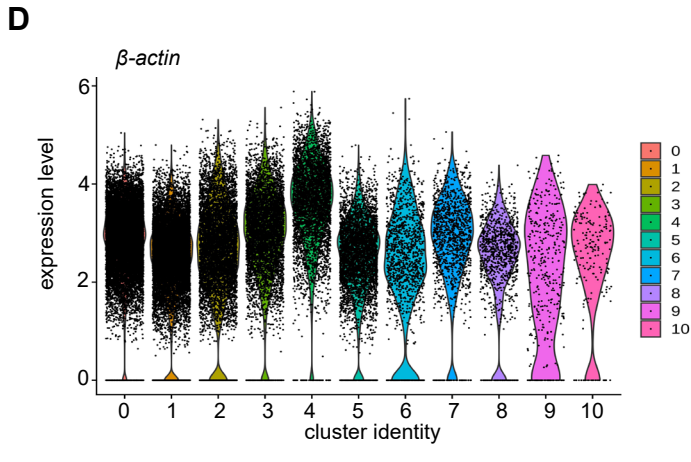

**Supplemental Figure 3. (A)** Dot plot of representative genes for identification of different eleven cellular clusters present in human skin: **cluster 0**, Fibroblast (*COL1A1*, *DCN*, *COL1A2*), **cluster 1**, Endothelial (*SELE*, *vWF*, *CDH5*), **cluster 2**, NK cells (*NKG7*, *GZMB*, *CXCR4*), **cluster 3**, Smooth Muscle Cells (*TAGLN*, *ACTA2*, *TPM2*), **cluster 4**, Myeloid cells (*LYZ*, *IL1B*, *CXCL8*), **cluster 5**, Keratinocyte 1 (*KRT14*, *KRT5*, *KRT1*), **cluster 6**, Keratinocyte 2 (*KRT7*, *KRT19*, *AQP5*), **cluster 7**, Mast Cells (*TPSAB1*, *CTSG*, *TPSB2*), **cluster 8**, Lymphatic endothelial cells (*LYVE1*, *TFF3*, *CCL21*), **cluster 9**, B cells (*IGHG1*, *IGHM*, *JCHAIN*) and **cluster 10**, Melanocytes (*DCT*, *PMEL*, *MLANA*). **(B)** tSNE plots showing the expression of one signature marker of each cluster as mentioned. **(C)** Bar graph showing percentage distribution of the cells in each cluster in human skin and in chronic WE. **(D)** Violin plot showing expression level of housekeeping gene  $\beta$ -actin in the identified 11 clusters.

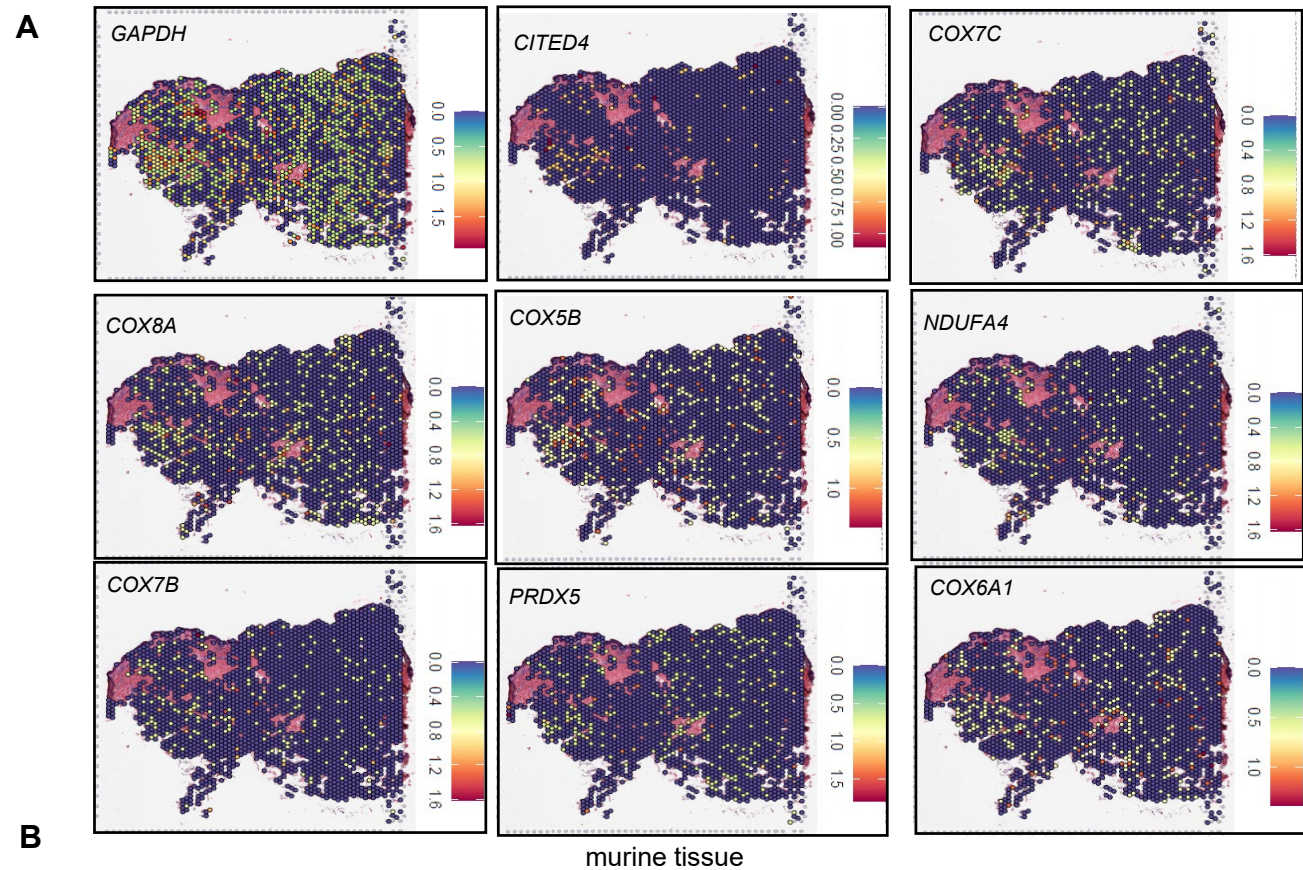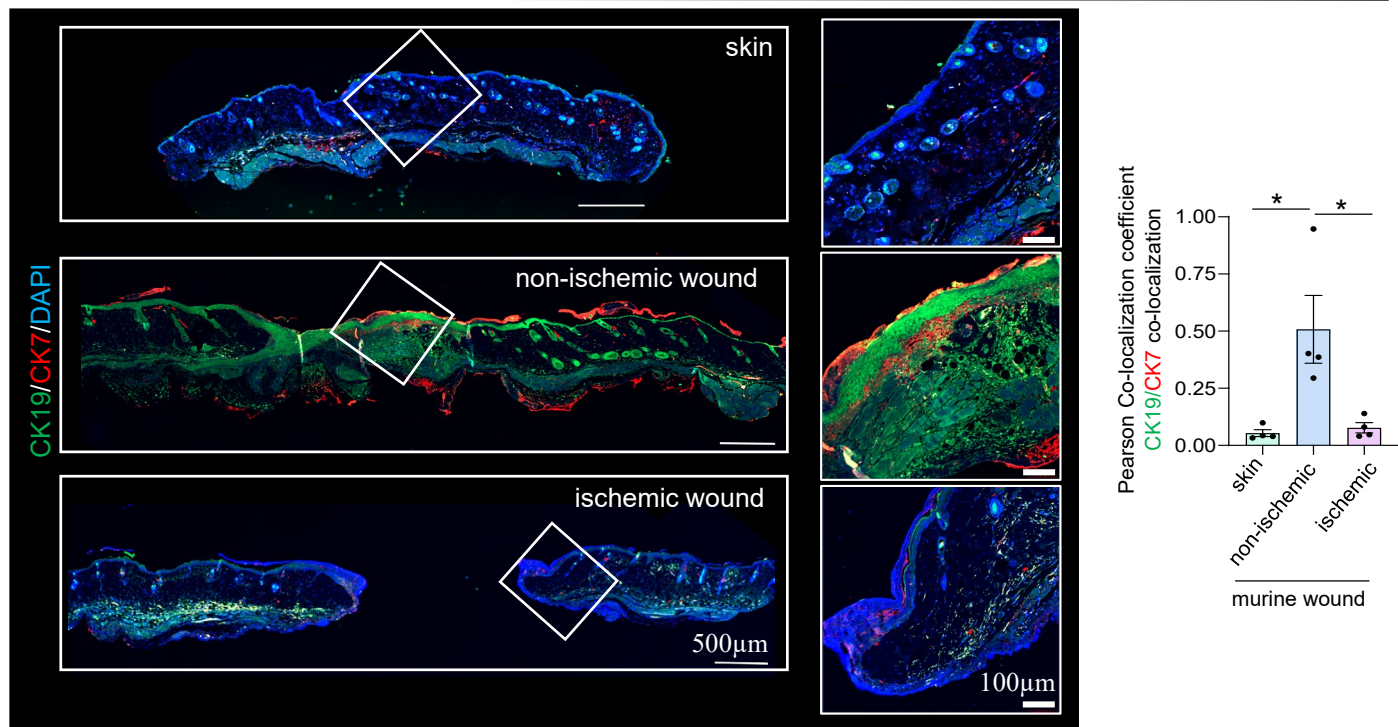

**Supplemental Figure 4.**(A) Spatial transcriptome profile (and localization) of top transcription factors, enzymes and metabolically active genes with increased expression levels in Kera 2 (refer Figure 3 C-F) of human skin shown using spatial feature plot function in Seurat. Scale bar for expression levels is provided, where the color towards red indicates high expression. (B) Representative IHC analyses for CK19–CK7 colocalization in ischemic and non-ischemic murine bipedicle wounds at day 3 post-wounding. Skin served as the baseline for colocalization analysis. Right panel represents the Pearson colocalization calculation. Data represented as the mean  $\pm$  SEM. (n = 4, \*P<0.05) (One-way ANOVA).

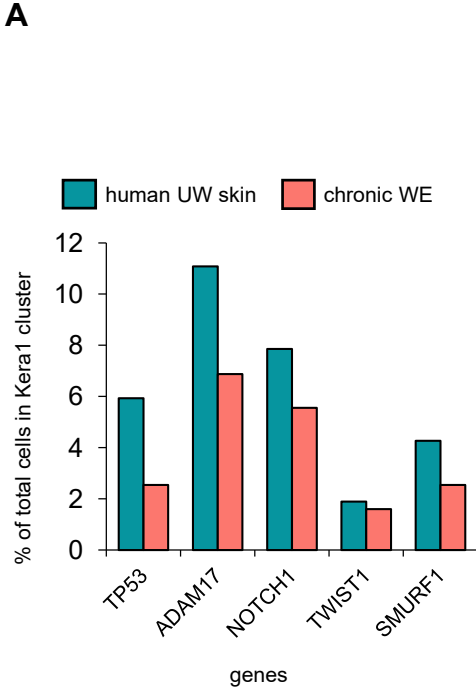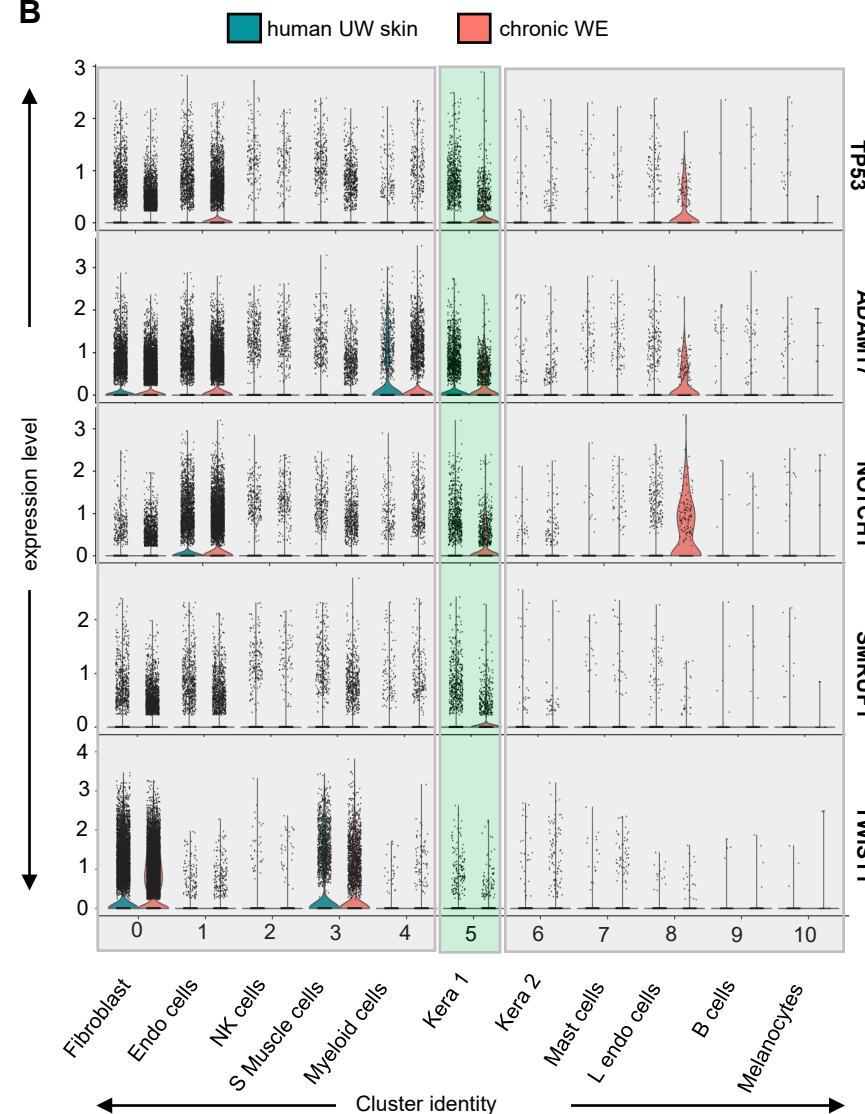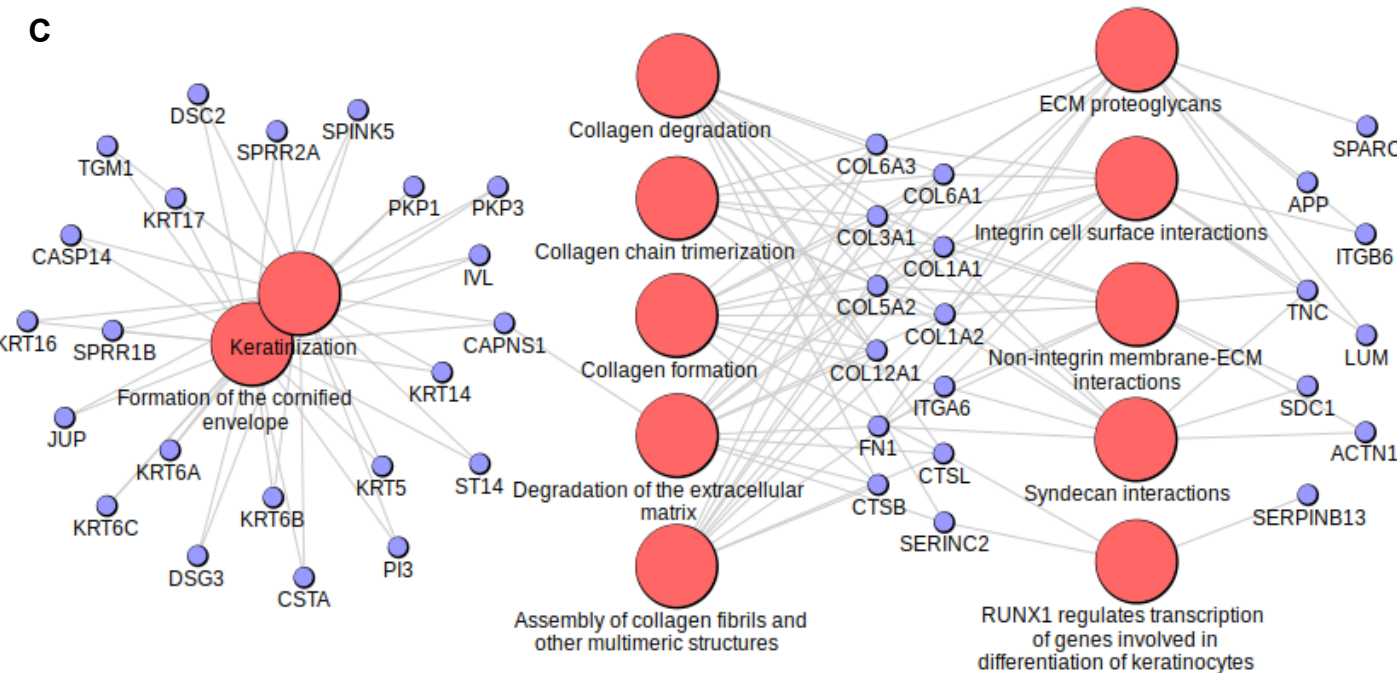

**Supplemental Figure 5. Kera1 specific downregulation of identified EMT markers in chronic WE.** (A) Bar graph representing total percentage of Kera1 cells expressing *TP53*, *ADAM17*, *NOTCH1*, *TWIST1* and *SMURF1* in Kera1 cluster obtained from human skin or chronic WE. (B) Violin plots comparing the expression level of *TP53*, *ADAM17*, *NOTCH1*, *SMURF1* and *TWIST1* in each cluster between human skin (left) and chronic WE (right). (C) Network of reactome enrichment of the upregulated pathways in Kera-1 cluster of chronic WE (adjusted p value < 0.001 and at least 8% of the pathway genes found in the DEG).



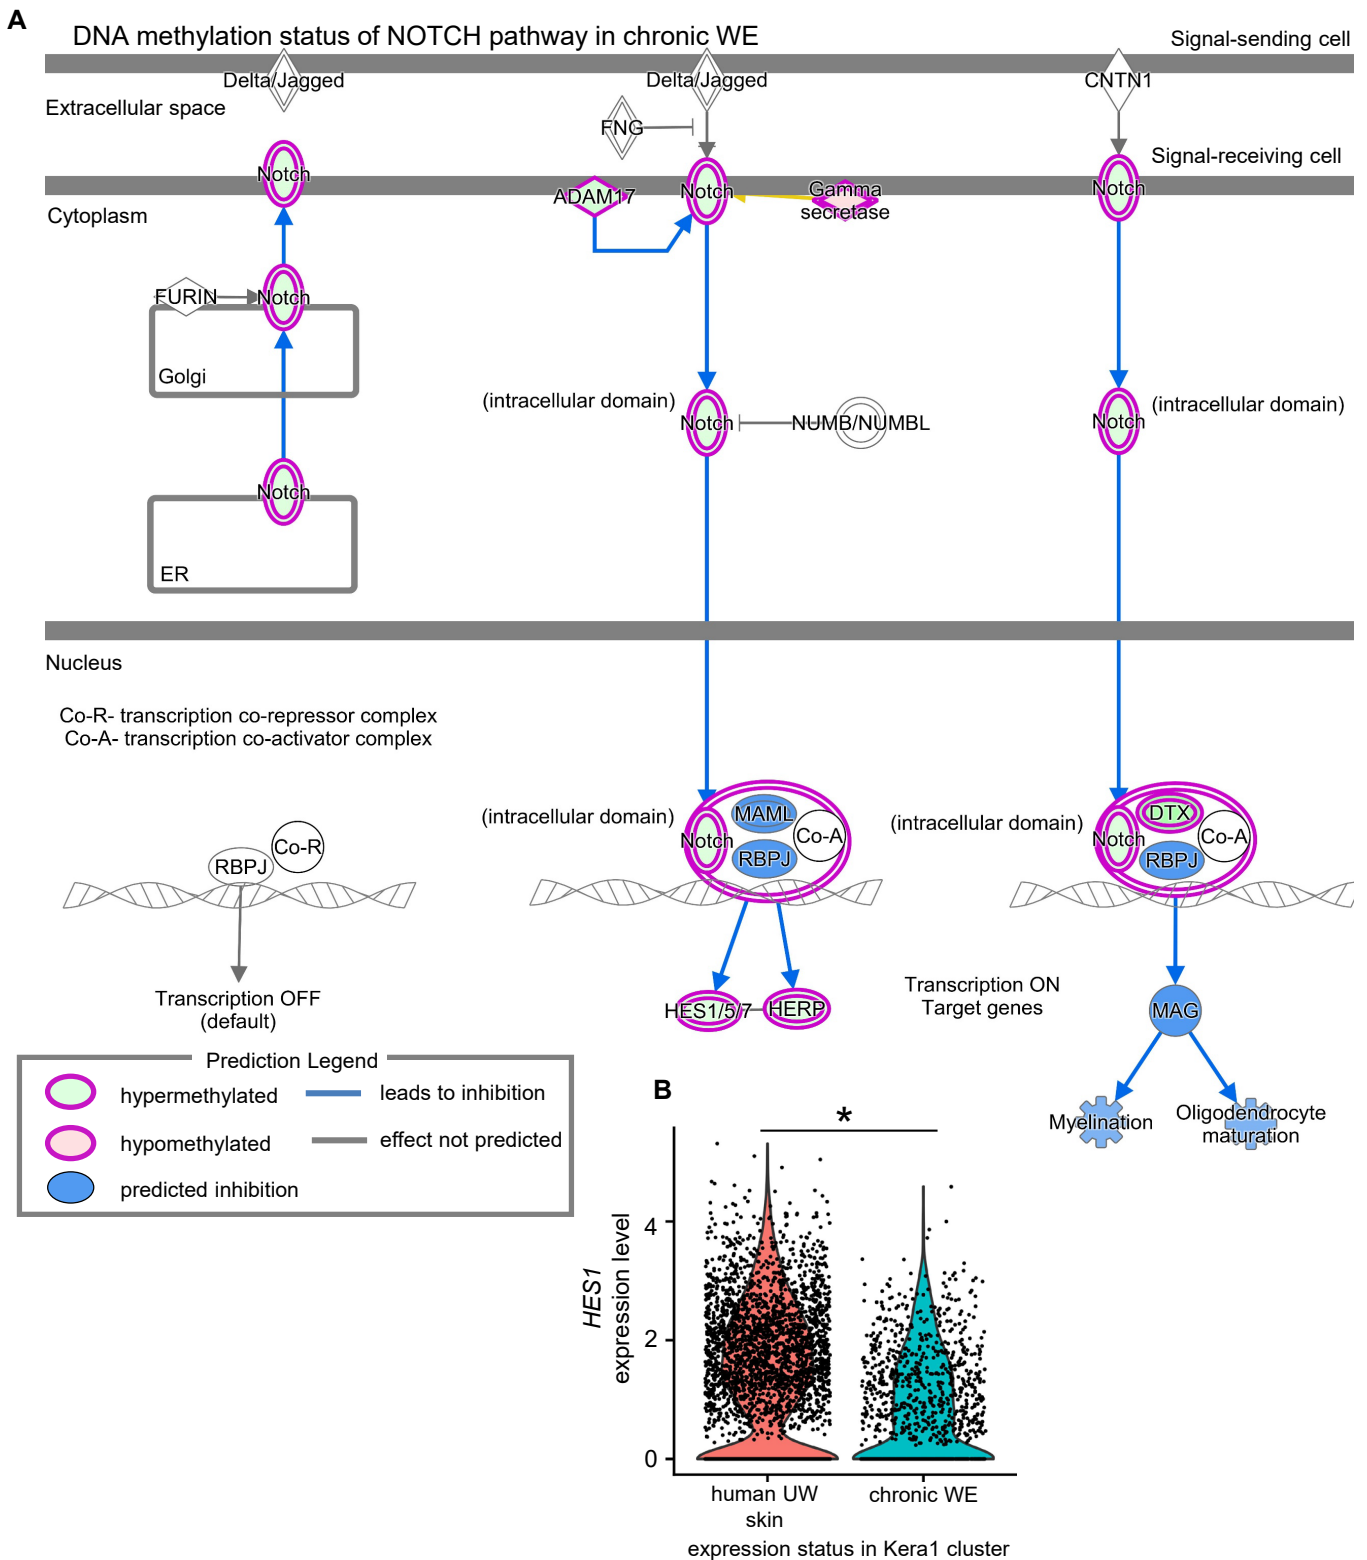

**Supplemental Figure 6. Methylation analysis of the NOTCH pathway in chronic WE.** (A) To investigate the methylation status of NOTCH signaling pathway in chronic WE, the list of molecules involved were retrieved from the EMBL-EBI database (taxon: Homo Sapiens). The intersection analysis between NOTCH molecules and differentially methylated genes in chronic WE revealed 28 DMRs significantly associated with chronic WE (24 hypermethylated, 4 hypomethylated). IPA analysis was done to visualize the methylation status of NOTCH signaling molecules. (B) Violin plot showing expression level of HES1 in Kera1 sub-cluster from human UW skin and chronic WE. \* adjusted P value <0.00001, Wilcoxon Rank Sum test).

**A**

DNA methylation status of WNT pathway in chronic WE

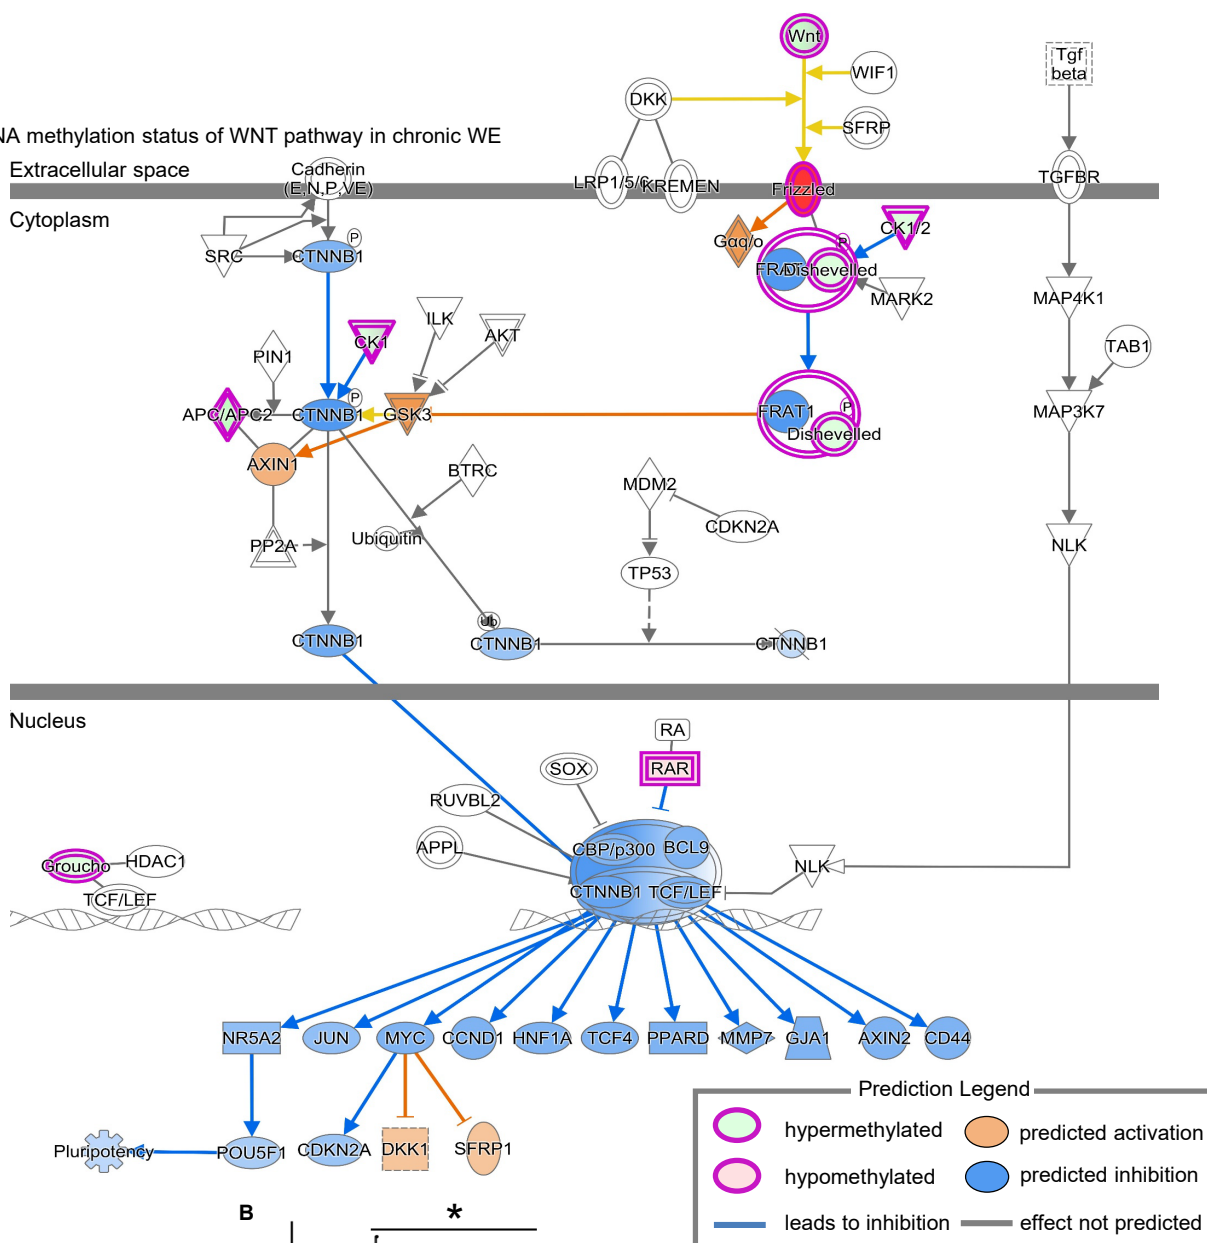**B**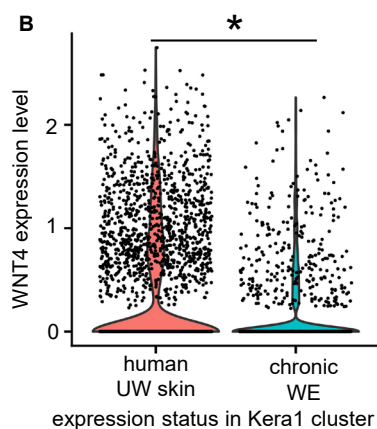

**Supplemental Figure 7. Methylation analysis of the WNT pathway in chronic WE.** (A) To investigate the methylation status of WNT signaling pathway in chronic WE, the list of molecules involved were retrieved from the EMBL-EBI database (taxon: Homo Sapiens). The intersection analysis between WNT molecules and differentially methylated genes in chronic WE revealed 44 DMRs significantly associated with chronic WE (36 hypermethylated, 8 hypomethylated). IPA analysis was done to visualize the methylation status of WNT signaling molecules. (B) Violin plot showing expression level of WNT4 in Kera1 sub-cluster from human UW skin and chronic WE. \* adjusted P value <0.00001, Wilcoxon Rank Sum test.

human day 7 acute wound and uninjured skin (GSE137897)

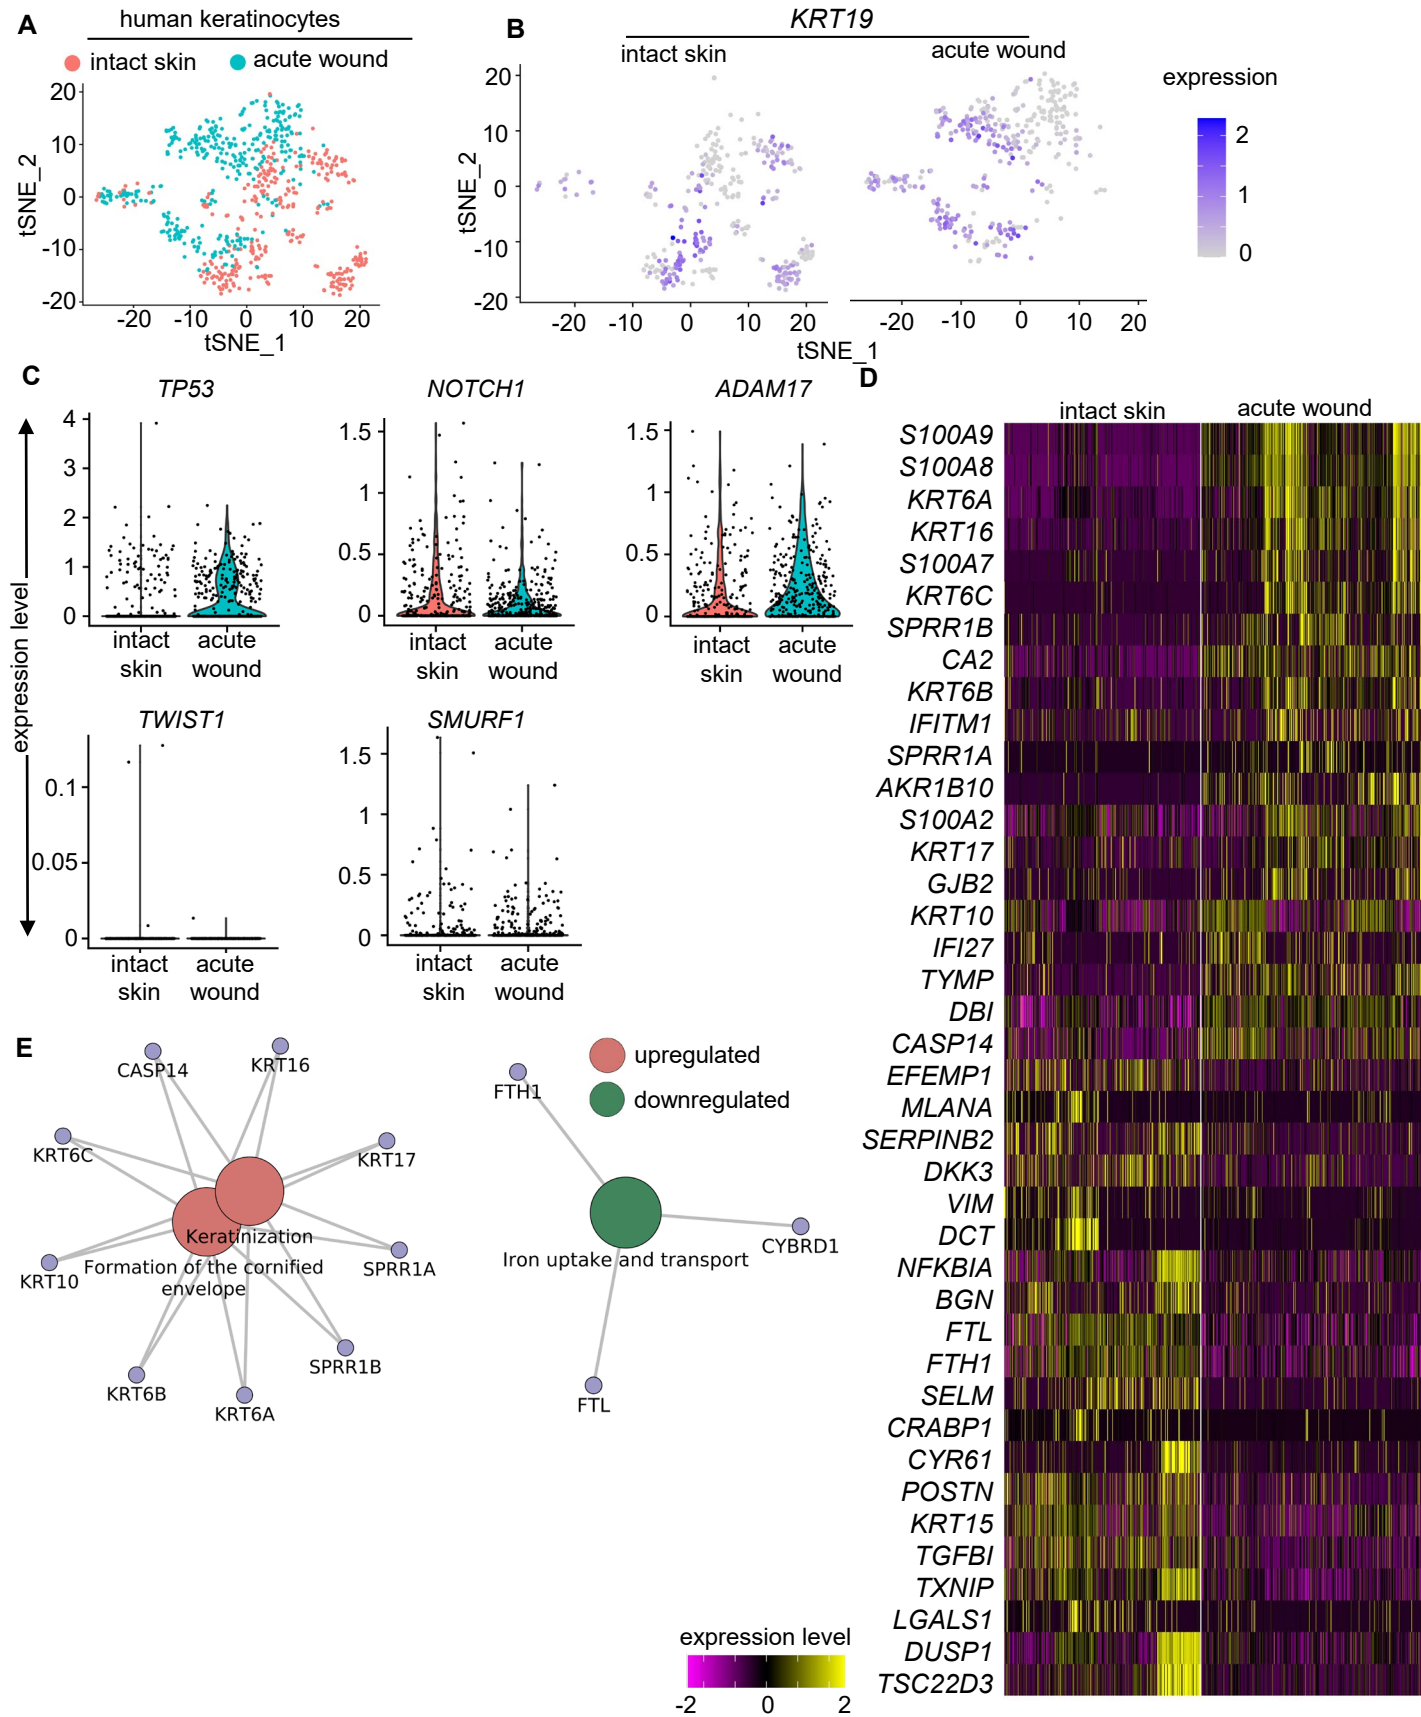

**Supplemental Figure 8. Gene expression changes in keratinocytes from day 7 human acute wounds.**

**(A)** tSNE plot showing keratinocytes in the intact skin (314 cells) and in day 7 acute wound (355 cells) from (data from NCBI Gene Expression Omnibus (GSE137897)). **(B)** Expression level of KRT19 (**Kera2 marker**) in keratinocytes from intact skin and day 7 acute wounds. **(C)** Violin plots showing expression level of genes of interest in intact skin and day 7 acute wound keratinocytes. These genes were not significantly different between intact skin and day 7 acute wound (based on fold change cut off). **(D)** Heatmap representing the top 20 upregulated and downregulated genes in keratinocytes from acute wound compared to intact skin. **(E)** Top upregulated and downregulated pathways in keratinocytes from acute wound compared to intact skin.

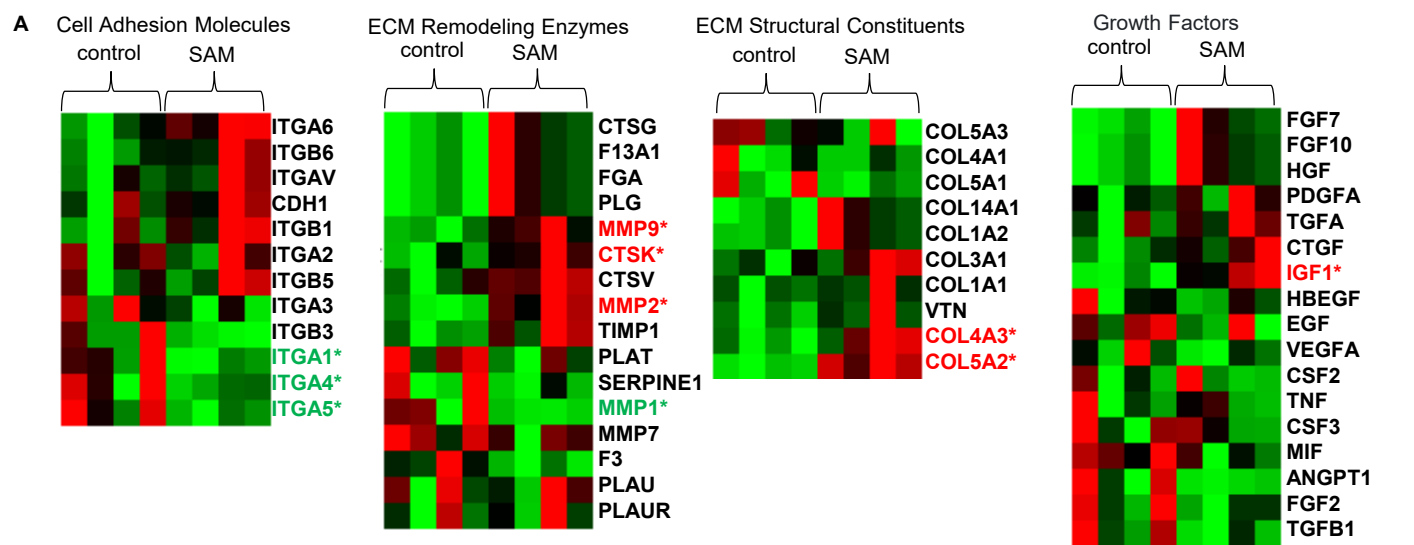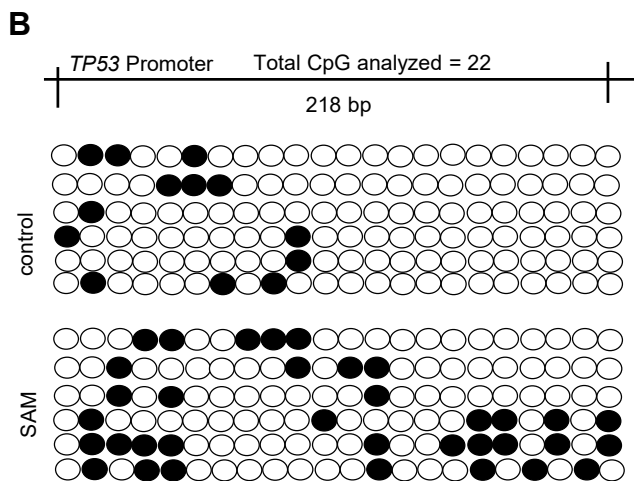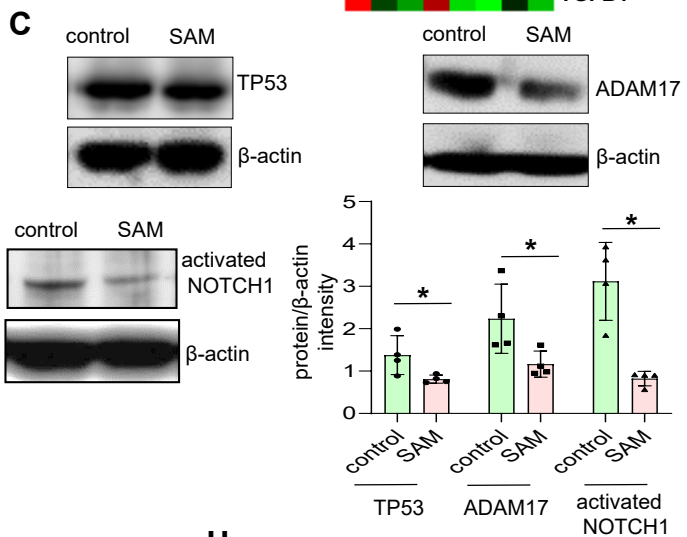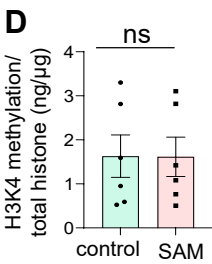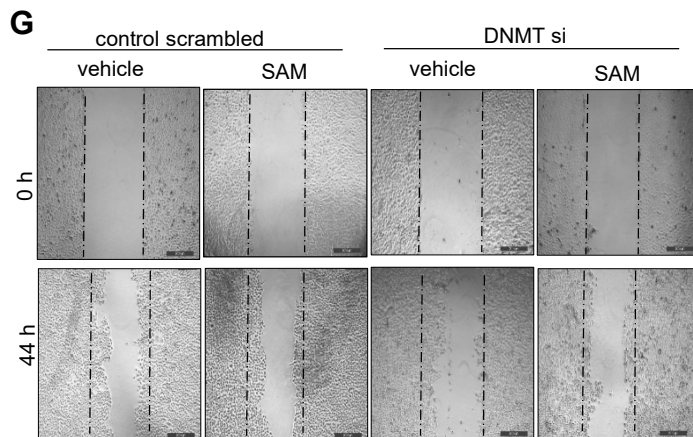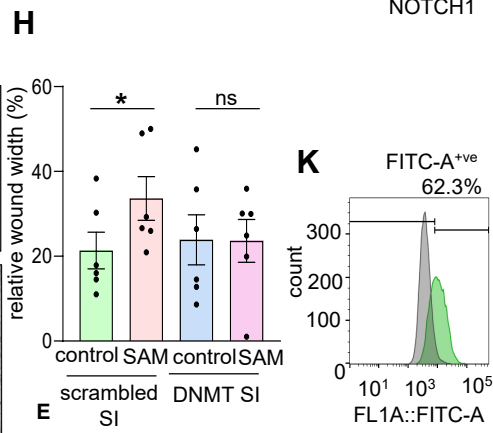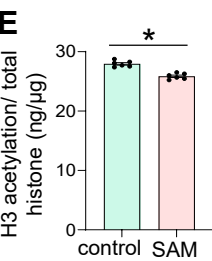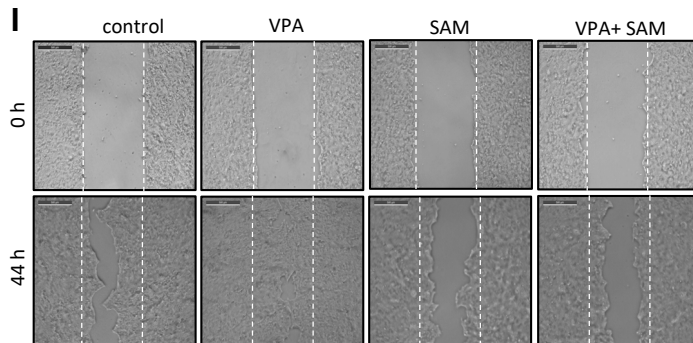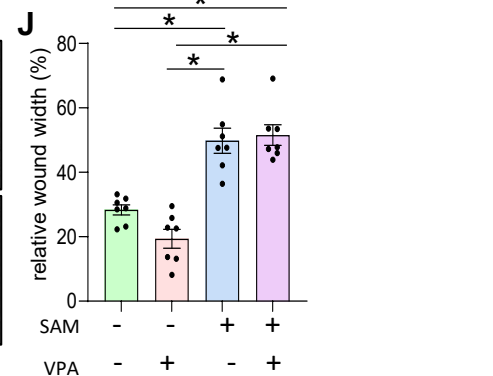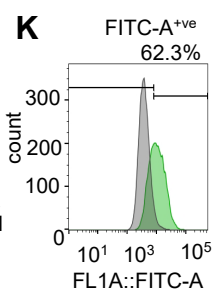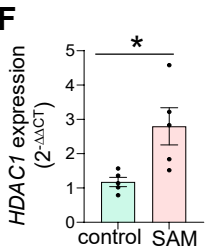

**Supplemental Figure 9. SAM treatment induce DNA methylation in keratinocytes in a DNMT dependent fashion.** (A) Heat map showing gene expression changes of wound healing related genes as catalogued by RT<sup>2</sup> Profiler™ PCR array (PAHS-121ZC) was done in HaCaT keratinocytes post 44h of scratch migration assay. Scratch migration assay was performed after 48 h of pretreatment with vehicle control or SAM (80 μM). Red, upregulated in SAM; Green, downregulated in SAM treated cells. Fold change cutoff = ±1.5. n = 4, \*p< 0.05. (B) Schematic diagram showing the regions of TP53 promoter (-1069bp to -821bp) analyzed through bisulfite genomic sequencing of DNA from HaCaT keratinocytes exposed to vehicle control or S-adenosylmethionine (SAM) (80 μM, 48 h). Diagrammatic representation of the promoter methylation status has been shown (methylated CpG, black; unmethylated CpG, white). The level of hypermethylated CpGs in TP53 promoter increased from basal 18% (vehicle control treated cells) to 45% in SAM treated keratinocytes. (C) Western blot analysis showing the expression of TP53 (left), ADAM17 (right) and activated NOTCH1 (bottom) in HaCaT keratinocytes exposed to vehicle control or S-adenosylmethionine (SAM) (80 μM, 48 h). β-actin was used as loading control. n =4; \*P<0.05, Student's t-test. (D) Global histone H3K4 methylation and (E) total acetylated histone H3 enzyme-linked immunosorbent assay (ELISA) in HaCaT keratinocytes exposed to vehicle control or S-adenosylmethionine (SAM) (80 μM, 48 h). (n =6; \*P<0.05, Student's t-test). (F) qRT-PCR analysis of HDAC1 expression in HaCaT keratinocytes exposed to vehicle control or SAM (80 μM). (n =5; \*P<0.05, Student's t-test). (G) Representative images of scratch-wound migration assay of HaCaT keratinocytes . Scratch migration assay was performed after 48 h of pretreatment with vehicle control or SAM (80 μM) in presence of control scrambled or DNMT si and followed for 44 h after wounding. (H) Quantitation of relative wound with post-44 h of scratch wound was presented as percentage of wound area. n = 6, \*p< 0.05 (One-way ANOVA). (I) Representative images of scratch-wound migration assay of HaCaT keratinocytes. Scratch migration assay was performed after 48 h of pretreatment with vehicle control or SAM (80 μM) followed for 44 h after wounding in presence of HDAC1 inhibitor valproic acid (VPA, 100 μM) or vehicle control. Scale bar = 500μm. (J) Quantitation of relative wound with post-44 h of scratch wound was presented as percentage of wound area. n = 6,7, \*p< 0.05 (One-way ANOVA). (K) Flow cytometric detection of GFP expression in HaCaT keratinocytes as a indicative of the efficiency of dCas-9-DNMT3A-EGFP-ANV plasmid transfection.

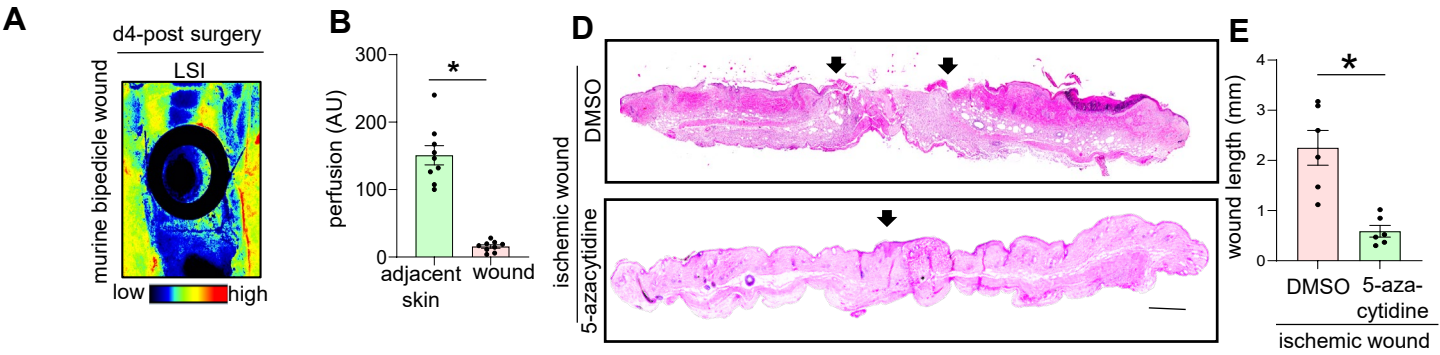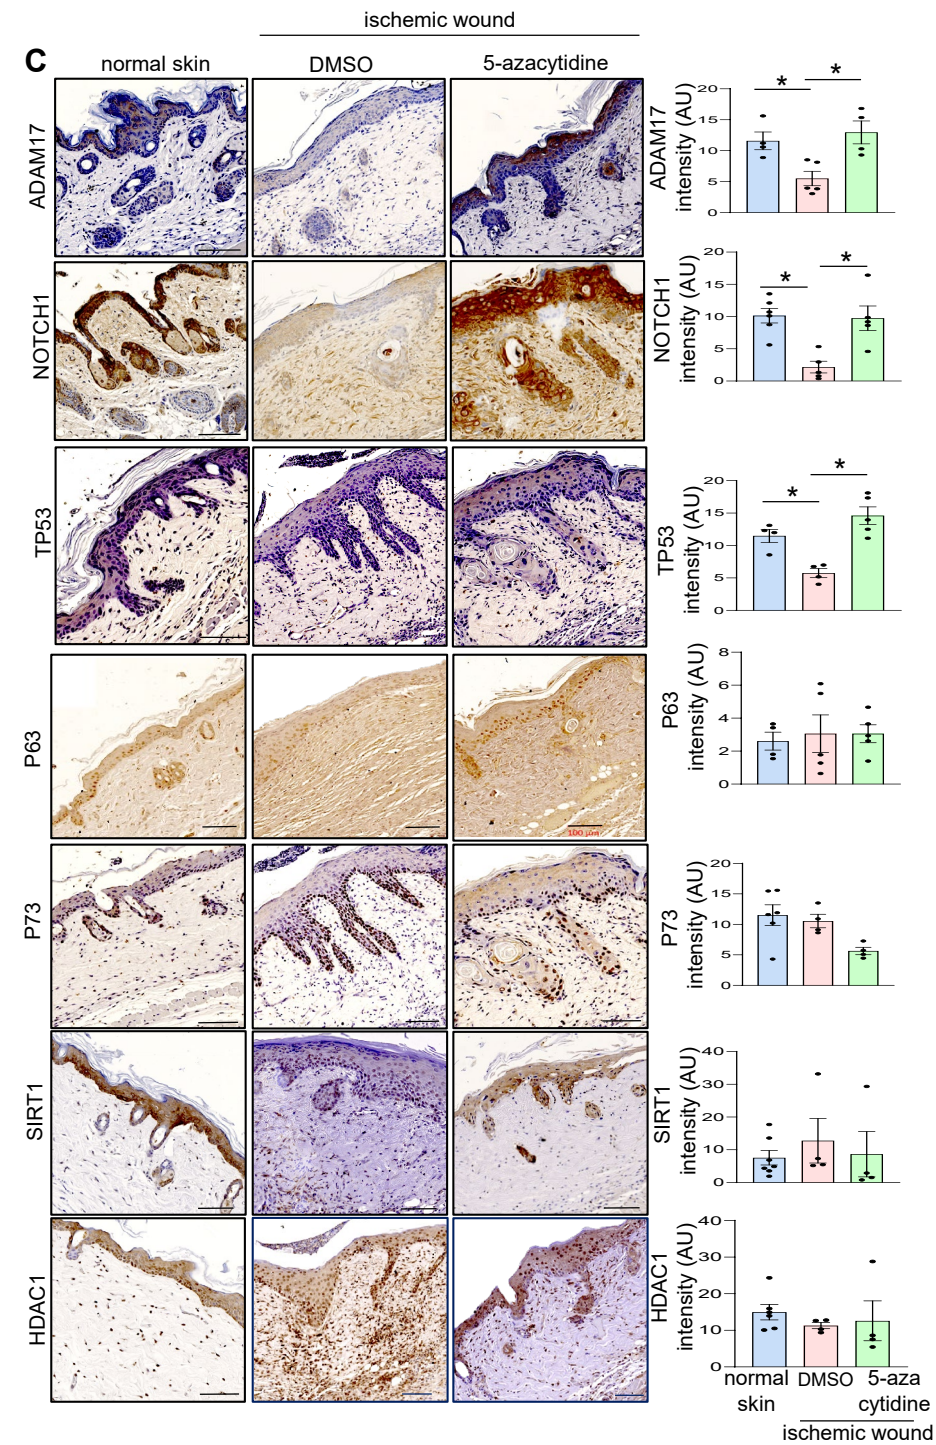

**Supplemental Figure 10. Correction of hypermethylation improves ischemic wound closure by rescuing identified EMT regulators** (A) Laser speck imaging (LSI) image of ischemic bipedicle wound at day 4 post-wounding. (B) Quantification of LSI images of bipedicle wound and the adjacent non-ischemic skin. (Scale = 0.5mm; n = 9; \*P<0.05, Student's t-test). (C) Representative IHC analysis of TP53, ADAM17, NOTCH1, P63, P73, SIRT1 and HDAC1 in paraffin sections from murine skin and ischemic bipedicle wounds treated with either vehicle control or 5-azacytidine. Right panels represent the intensity analysis of the images. Scale bar, 100  $\mu$ m. n = 4-7, \*p< 0.05, One-way ANOVA. (D) Representative images of vehicle control or 5-azacytidine treated ischemic bipedicle wound biopsy tissue sections (10 $\mu$ m) of (day 10 post-wounding) stained using hematoxylin and eosin. (E) Bar graph represents the wound contraction in abovementioned mice groups. (n = 6, \*p< 0.05, Student's t-test).



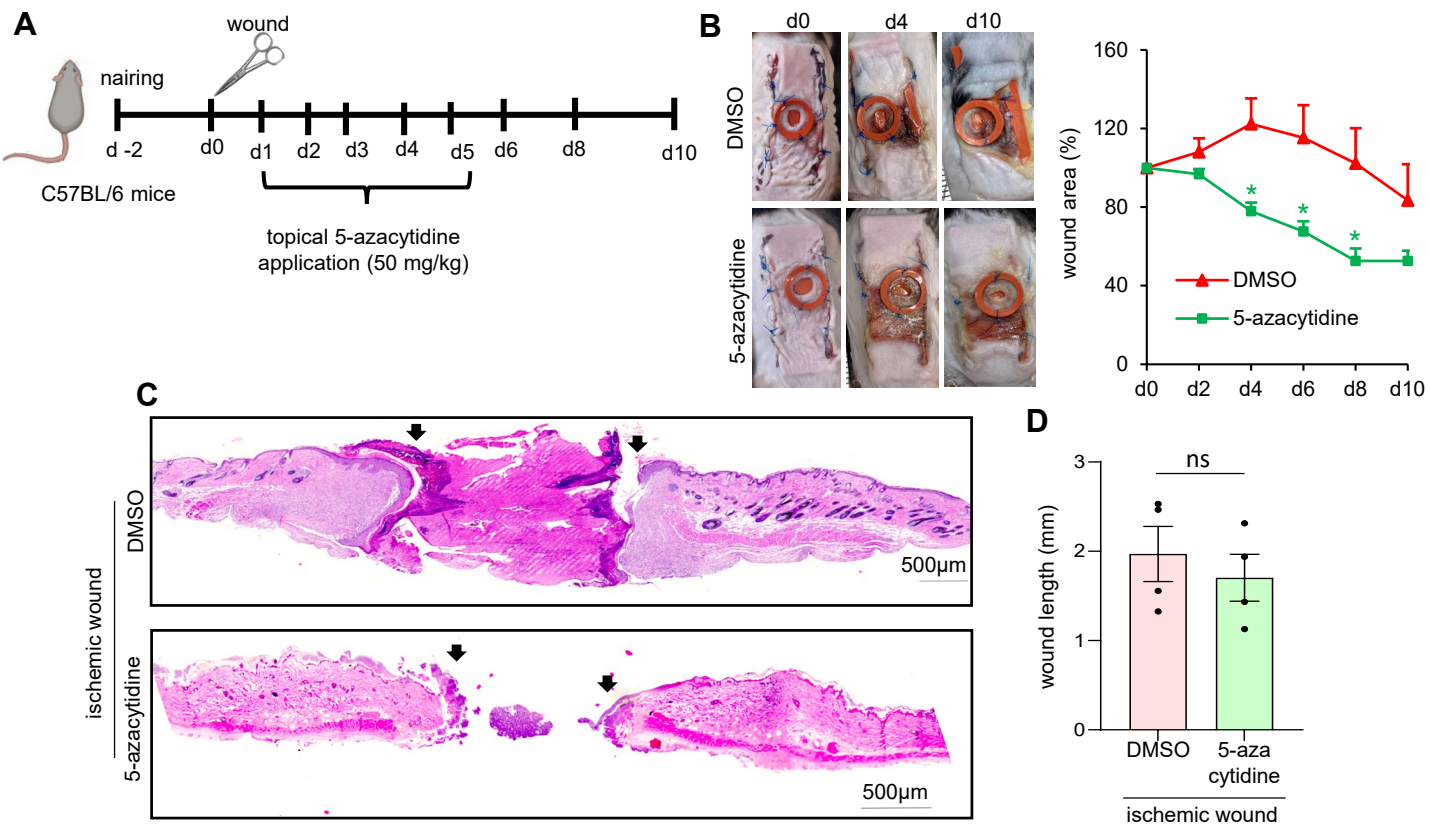

late 5-azacytidine intervention in ischemic wounds (treatment starts d7 post-wounding)

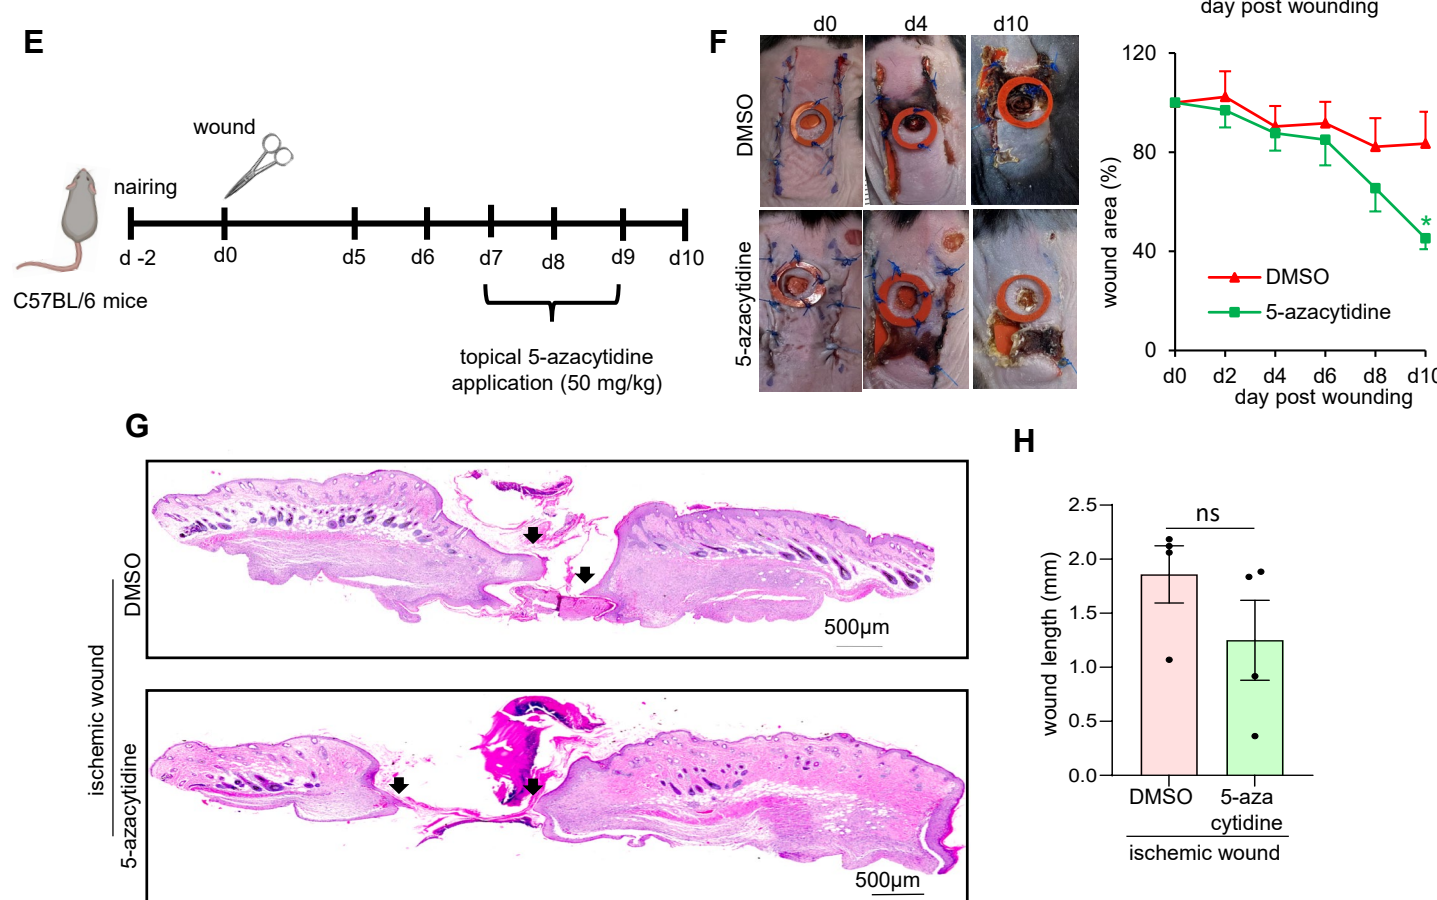

**Supplemental Figure 11. Effect of early (d1 post-wounding) and late (d7 post-wounding) 5-azacytidine treatment on ischemic wounds.** (A) Schematic diagram showing topical delivery of 5-azacytidine to the ischemic bipedicle wound created on dorsal skin of C57BL/6 mice starting from day 1 post-wounding. (B) Representative images (**left**) and wound closure analysis (**right**) at different days post-wounding in bipedicle ischemic wounds of mice treated with either vehicle control (DMSO) or 5-azacytidine by digital planimetry. Data was presented as percentage of wound area (**right**).  $n = 6$ ;  $*p < 0.05$  (Student's t-test). Data represented as the mean  $\pm$  SEM. (C) Representative images of vehicle control or 5-azacytidine treated ischemic bipedicle wound biopsy tissue sections ( $10\mu\text{m}$ ) of (day 10 post-wounding) stained using hematoxylin and eosin. (D) Bar graph represents the wound contraction in abovementioned mice groups. ( $n = 4$ ). (E) Schematic diagram showing topical delivery of 5-azacytidine to the ischemic bipedicle wound created on dorsal skin of C57BL/6 mice starting from day 7 post-wounding. (F) Representative images (**left**) and wound closure analysis (**right**) at different days post-wounding in bipedicle ischemic wounds of mice treated with either vehicle control (DMSO) or 5-azacytidine by digital planimetry. Data was presented as percentage of wound area (**right**).  $n = 5,6$ ;  $*p < 0.05$  (Student's t-test). Data represented as the mean  $\pm$  SEM. (G) Representative images of vehicle control or 5-azacytidine treated ischemic bipedicle wound biopsy tissue sections ( $10\mu\text{m}$ ) of (day 10 post-wounding) stained using hematoxylin and eosin. (H) Bar graph represents the wound contraction in abovementioned mice groups. ( $n = 4$ ).

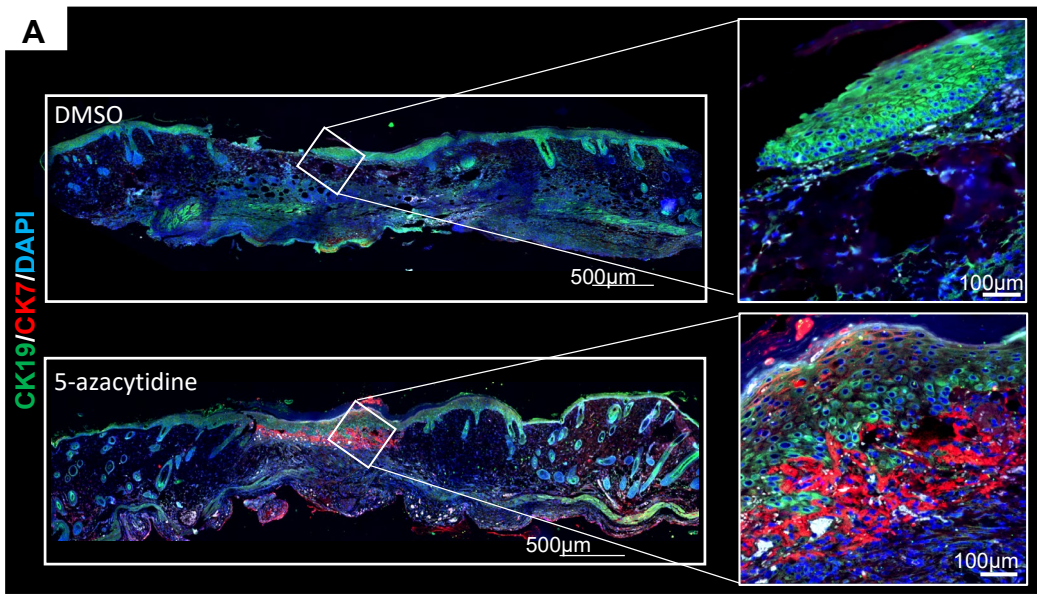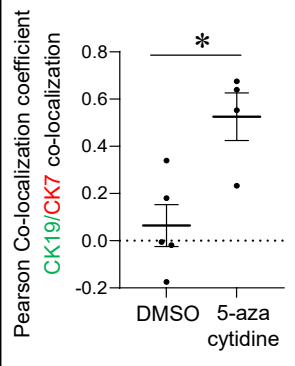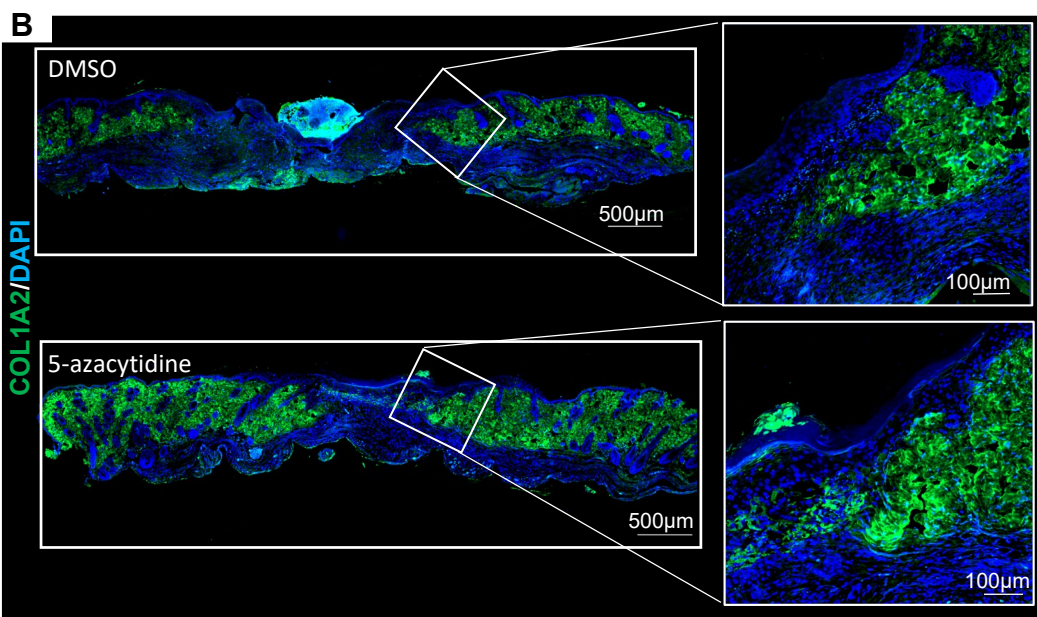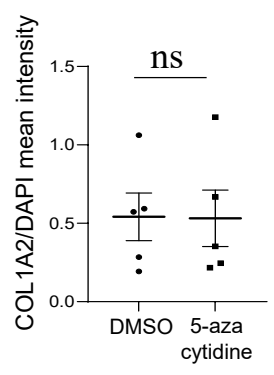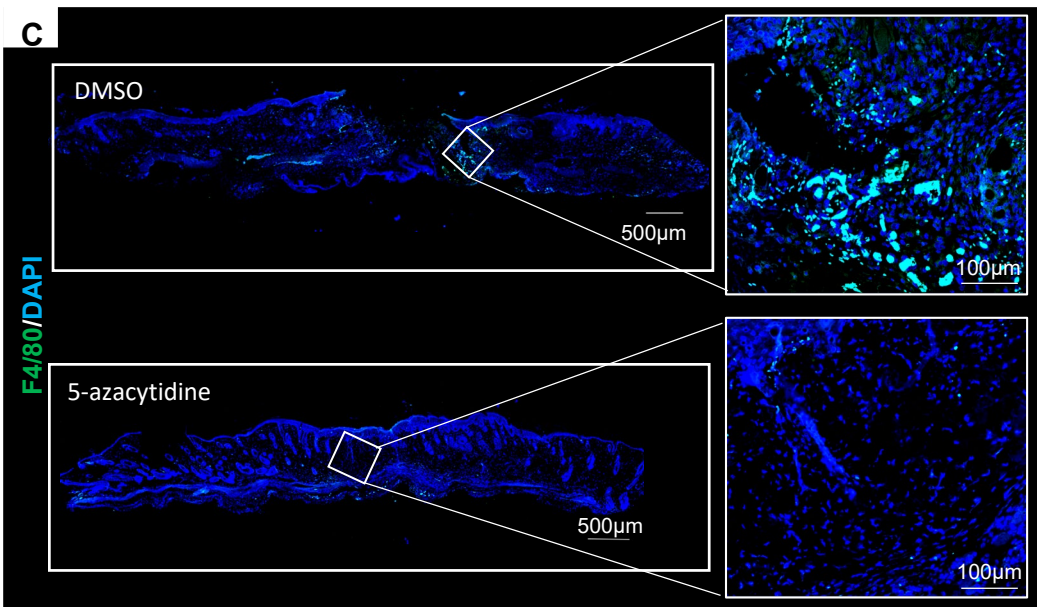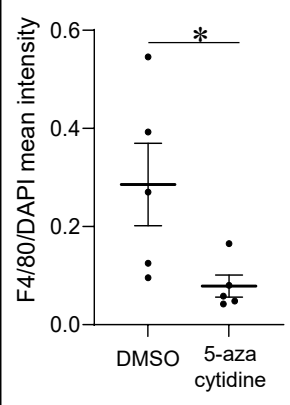

**Supplemental Figure 12. Effect of 5-azacytidine mediated change on EMT program on different cellular compartments in murine wound-edge.** (A) Representative IHC images of d10 wound-edge for CK19–CK7 colocalization in vehicle control or 5-azacytidine treated (treatment started day 5 post-wounding) ischemic bipedicle wound biopsy tissue sections (10µm). Right panel represents the Pearson colocalization calculation. Data represented as the mean ± SEM. (n = 5,4,\*p< 0.05, Student’s t-test). (B) Representative IHC images of d10 wound-edge for COL1A2 intensity in vehicle control or 5-azacytidine treated (treatment started day 5 post-wounding) ischemic bipedicle wound biopsy tissue sections (10µm). Right panel represents the mean intensity analysis of the IHC images (n=5). (C) Representative IHC images of d10 wound-edge for F4/80 intensity in vehicle control or 5-azacytidine treated (treatment started day 5 post-wounding) ischemic bipedicle wound biopsy tissue sections (10µm). Right panel represents the mean intensity analysis of the IHC images. (\*P<0.05, Student’s t-test, n=5).

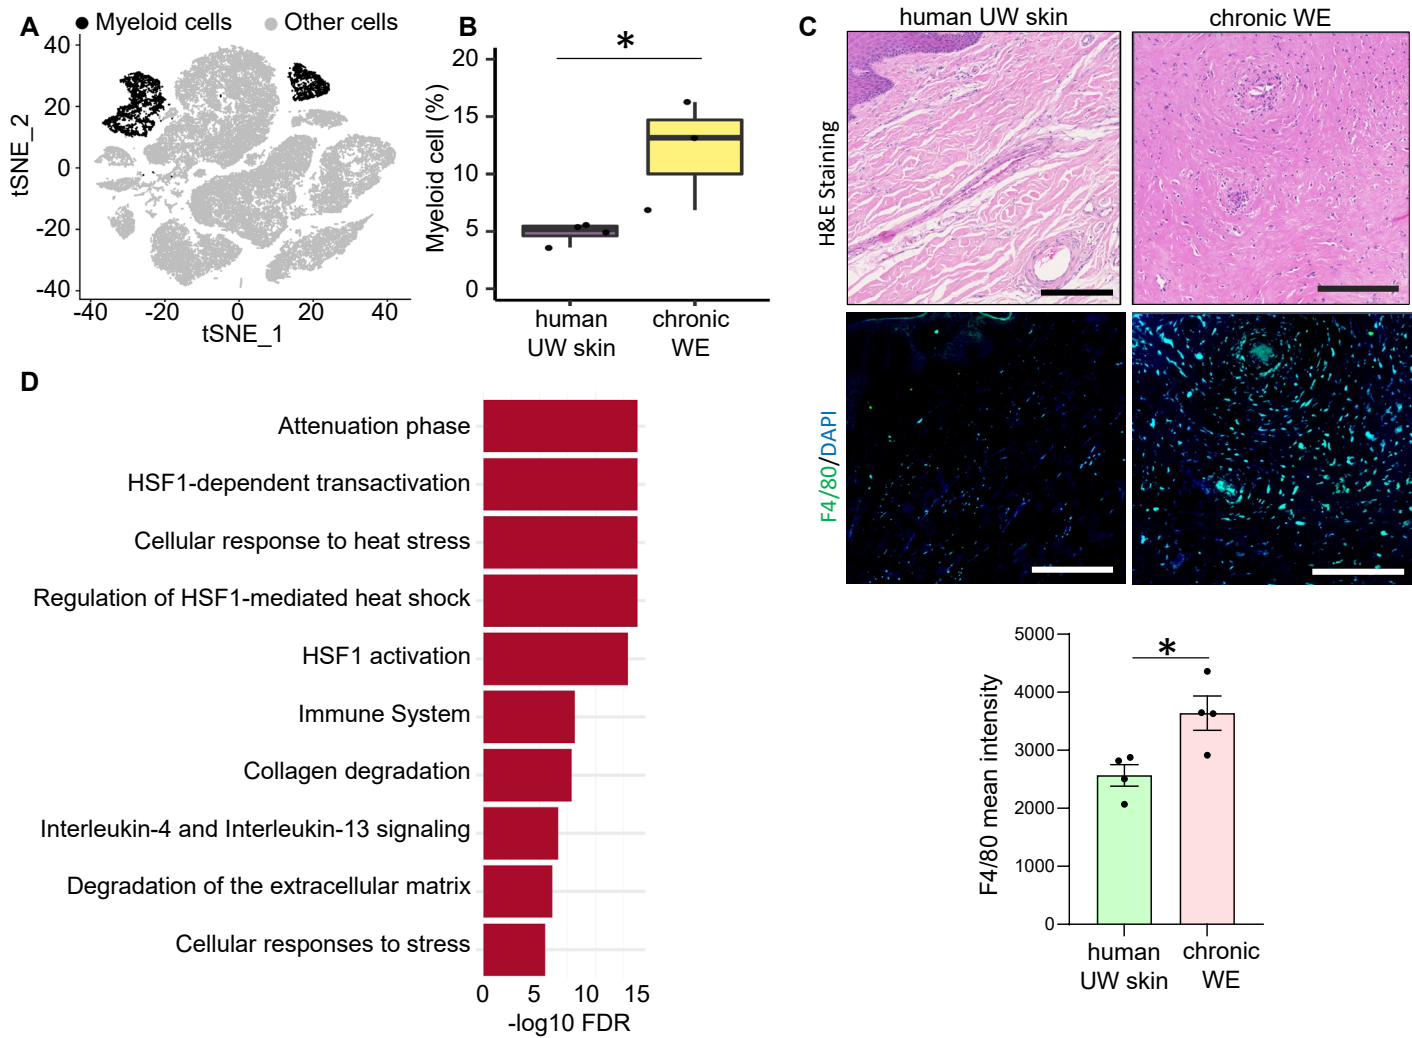

**Supplemental Figure 13. More abundance of myeloid cells in chronic WE.** (A) tSNE plot showing of myeloid cells (black dots) and other cells (grey dots) (Please also see **Figure 3A**). Markers of myeloid cells has been defined as  $LYZ^{hi}IL1B^{hi}CXCL8^{hi}$  in **Supplemental Figures 3A, B**. (B) Box plot showing percentage of myeloid cells relative to other cells in each sample of human unwounded (UW) skin and in chronic wound-edge (WE) (\* $P < 0.05$ , Student's t-test,  $n = 4, 3$ ). (C) Representative H&E (top) and IHC analysis of F4/80 in paraffin sections of human UW skin and chronic WE. Bottom panel represent the mean intensity analysis of the IHC images. (Scale = 200 $\mu$ m; \* $P < 0.05$ , Student's t-test,  $n = 4$ ). (D) Top 10 upregulated pathways in myeloid cells of chronic WE compared to human UW skin based on gene ontology analyses.

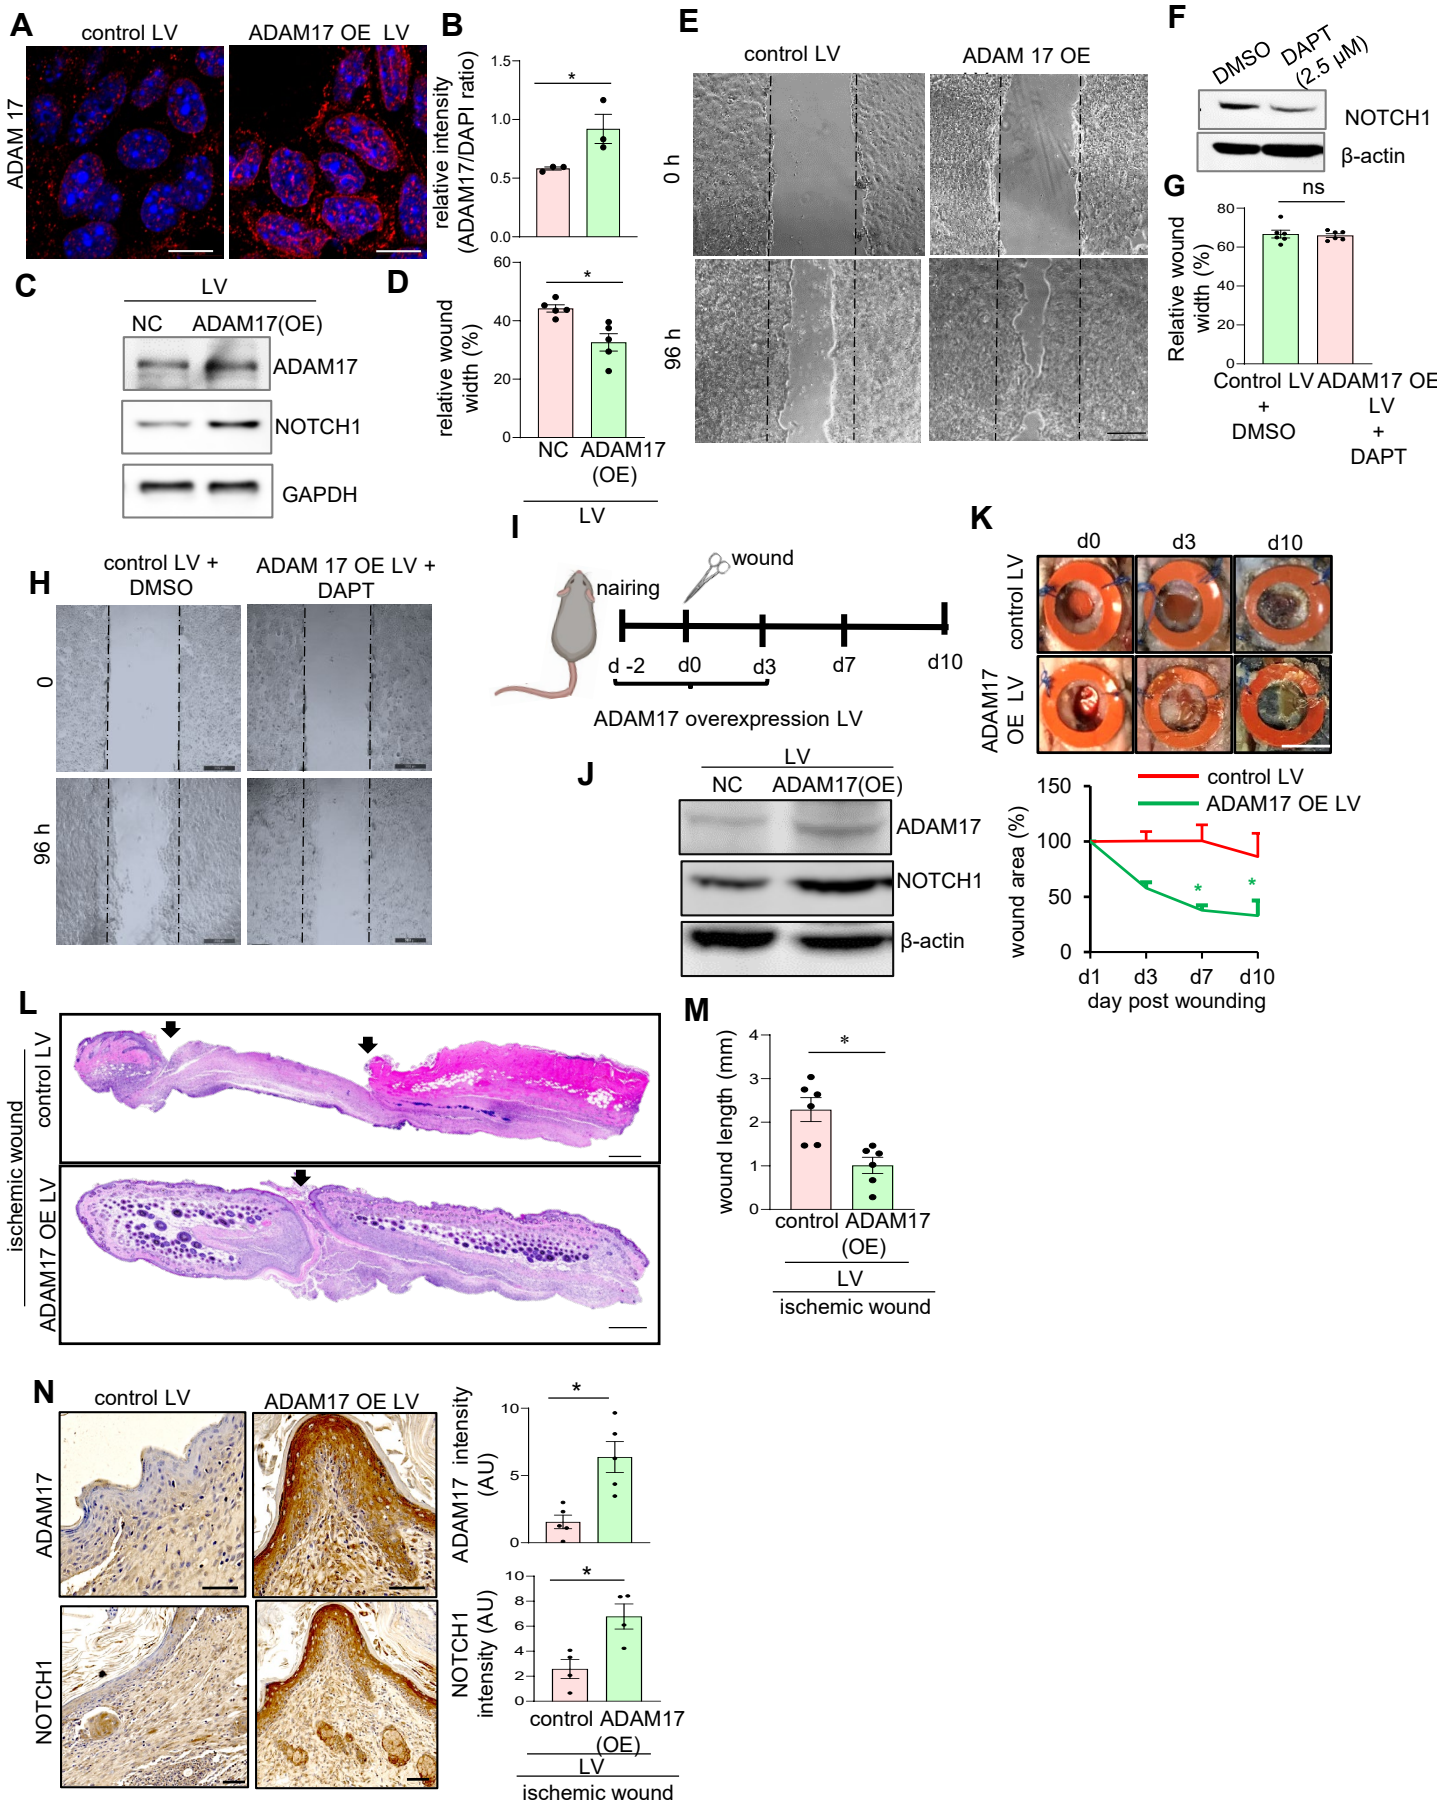

**Supplemental Figure 14. Overexpression of ADAM17 was able to promote ischemic wound closure via enabling NOTCH1.** Immunofluorescence analysis of ADAM17 in Kera-308 cells exposed to negative Control Lentifact™ (control LV) or ADAM17 NM\_009615.6 Lentifact™ (ADAM17 OE LV) particles and **(B)** their intensity analysis. DAPI intensity was used for normalization. (Scale = 20µm; \*P<0.001, Student's t-test). **(C)** Western blot analysis showing the lentivirus (LV) mediated overexpression of ADAM17 protein also increased the protein expression of NOTCH1. GAPDH was used as loading control. **(D)** Quantitation and **(E)** representative images of scratch-wound migration assay of Kera-308 cells. Scratch wound assay was performed after 48 h of transduction with (Control LV) or ADAM17 OE LV and followed for 96 h after wounding. (Scale = 200µm; n = 5; \*P<0.05, Student's t-test). **(F)** Western blot analysis showing the addition of DAPT (2.5 µM) mediated inhibition of NOTCH1 expression. B-actin was used as loading control. **(G)** Quantitation and **(H)** representative images of scratch-wound healing assay of Kera-308 cells. Scratch wound migration assay was performed after 48 h of transduction with Control LV or ADAM17 OE LV in presence or absence of NOTCH1 inhibitor DAPT and followed for 96 h after wounding. Data was presented as relative wound width. (n = 6, \*p< 0.05) (Student's t-test). **(I)** Schematic diagram showing subcutaneous delivery of control LV or ADAM17 OE LV to the ischemic bipedicle wound created on dorsal skin of C57BL/6 mice. **(J)** Western blot analysis showing the lentivirus (LV) mediated overexpression of ADAM17 protein *in vivo* also increased the protein expression of NOTCH1. β-actin was used as loading control. **(K)** Wound closure was monitored at different days post-wounding in bipedicle ischemic wounds of mice transduced with either control LV or ADAM17 OE LV by digital planimetry **(top)**. Data was presented as percentage of wound area **(bottom)**. n = 5, 6, \*P< 0.05 (Student's t-test). **(L)** Representative images of control LV or ADAM17 OE LV transduced ischemic wound biopsy tissue sections (10µm) of (day 10 post-wounding) stained using hematoxylin and eosin. Scale bar, 500 µm. **(M)** Bar graph represents the wound contraction in abovementioned mice groups. n = 6. \*P, 0.05 (Student t-test). **(N)** Representative IHC analysis of ADAM17 **(top)** and NOTCH1 **(bottom)** in paraffin sections from ischemic bipedicle wounds transduced with either control LV or ADAM17 OE LV. Right panels represent the intensity analysis of the images. Scale bar, 50 µm. n = 4, 5, \*p< 0.05. Data represented as the mean ± SEM.

**A** Tissue nanotransfection chip 2.0

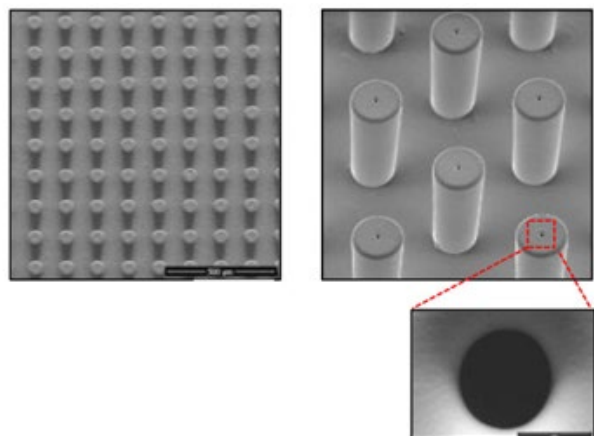

**B**

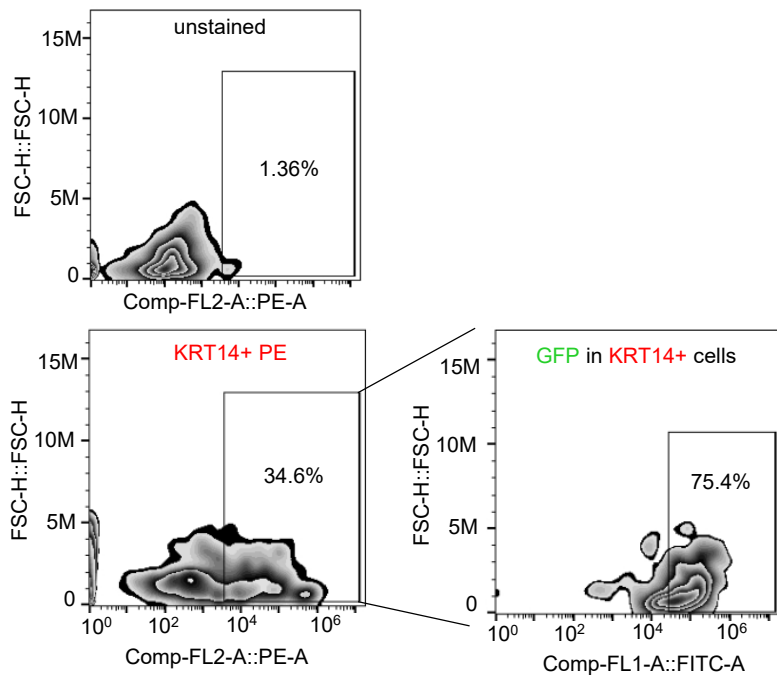

**C**

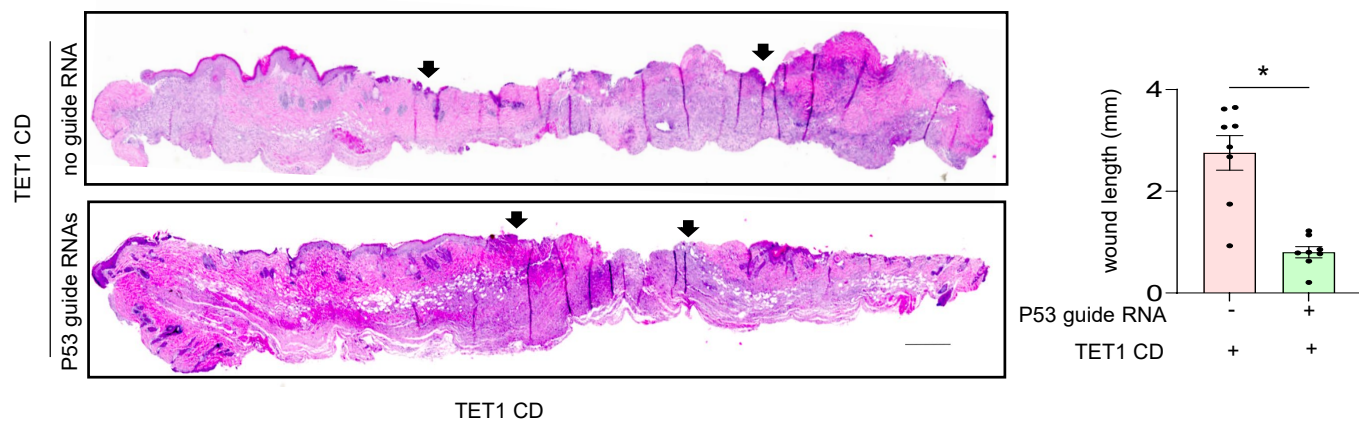

**D**

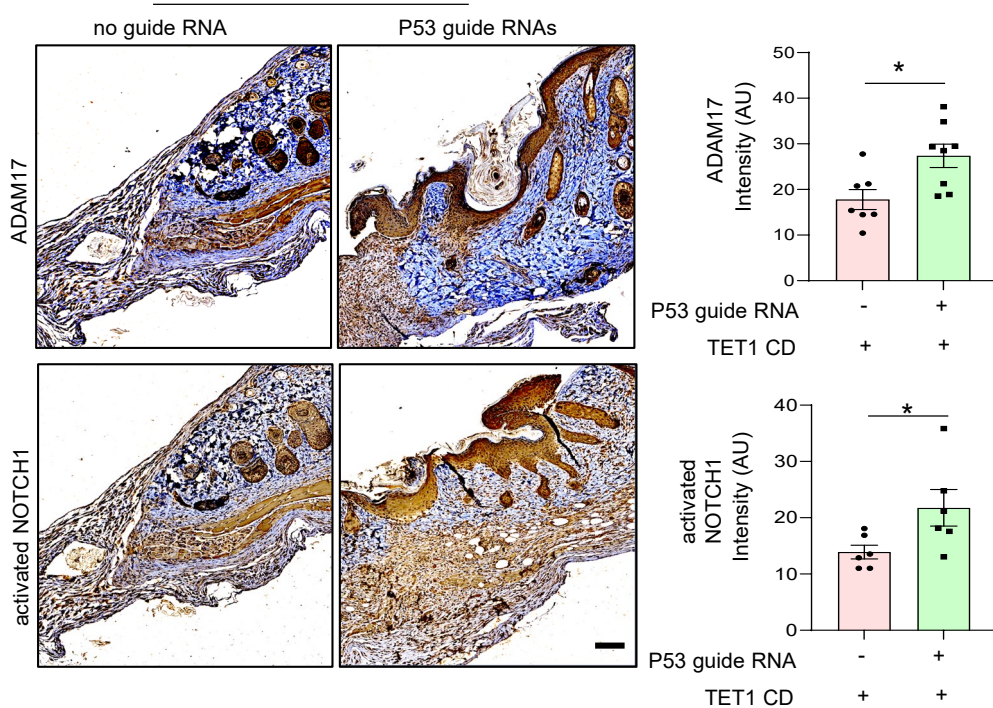



**Supplemental Figure 15. TNT2.0 based demethylation of TP53 promoter.** (A) Representative scanning electron microscopic images of tissue nanotransfection (TNT) chip 2.0. This modified TNT silicon chip (TNT<sub>2.0</sub>) has a longer needle height of 170  $\mu\text{m}$  and a pore diameter of 4  $\mu\text{m}$ . Figure is reprinted (adapted) with permission from Zhou *et al.*, ACS Nano 2020, 14, 10, 12732–12748. Copyright (2020) American Chemical Society. (B) Flow cytometric validation of keratinocyte specific delivery of KRT-14 promoter driven P53 gRNA targets through TNT. A total of  $70.9 \pm 3.1\%$  KRT14<sup>+</sup> cells were also expressing GFP (n = 6 different skin sites from 3 animals). (C) (Left) Representative hematoxylin and eosin images bipedicle wound biopsy (day 10 post-wounding) tissue sections (10 $\mu\text{m}$ ) of mice nanotransfected with TET1CD and peptide repeat in presence or absence of KRT14 promoter driven gRNA targets. (Right) Bar graph represents the wound contraction in abovementioned mice groups. n= 8, \*P< 0.05 (Student's t-test), Scale bar, 500  $\mu\text{m}$ . (D) Representative IHC analysis of ADAM17 (top) and activated NOTCH1 (bottom) in paraffin sections from murine ischemic bipedicle wounds nanotransfected with TET1CD and peptide repeat in presence or absence of KRT14 promoter driven P53 gRNA targets. For TET1CD-ADAM17 antibody staining, serial section from the same tissue block as in Figure 6K was used. Right panel represent the intensity analysis of the images. (Scale = 100 $\mu\text{m}$ ; n = 6-7; \*P<0.05, Student's t-test).

**Table S1: List of genes associated with regulation of epithelial to mesenchymal transition pathway hypermethylated in chronic WE compared to human skin**

| <b>Symbol</b> | <b>Entrez Gene Name</b>                        | <b>Location</b>     | <b>Type(s)</b>          | <b>Entrez Gene ID for Human</b> |
|---------------|------------------------------------------------|---------------------|-------------------------|---------------------------------|
| ADAM17        | ADAM metallopeptidase domain 17                | Plasma Membrane     | peptidase               | 6868                            |
| DVL1          | dishevelled segment polarity protein 1         | Cytoplasm           | other                   | 1855                            |
| FGFR1         | fibroblast growth factor receptor 1            | Plasma Membrane     | kinase                  | 2260                            |
| FOXC2         | forkhead box C2                                | Nucleus             | transcription regulator | 2303                            |
| HIF1A         | hypoxia inducible factor 1 alpha subunit       | Nucleus             | transcription regulator | 3091                            |
| KLB           | klotho beta                                    | Plasma Membrane     | enzyme                  | 152831                          |
| KRAS          | KRAS proto-oncogene, GTPase                    | Cytoplasm           | enzyme                  | 3845                            |
| LOX           | lysyl oxidase                                  | Extracellular Space | enzyme                  | 4015                            |
| MAP2K3        | mitogen-activated protein kinase kinase 3      | Cytoplasm           | kinase                  | 5606                            |
| MAP2K5        | mitogen-activated protein kinase kinase 5      | Cytoplasm           | kinase                  | 5607                            |
| MET           | MET proto-oncogene, receptor tyrosine kinase   | Plasma Membrane     | kinase                  | 4233                            |
| mir-155       | microRNA 155                                   | Cytoplasm           | microRNA                | 406947                          |
| NFKB2         | nuclear factor kappa B subunit 2               | Nucleus             | transcription regulator | 4791                            |
| NOTCH4        | notch 4                                        | Plasma Membrane     | transcription regulator | 4855                            |
| PIK3R2        | phosphoinositide-3-kinase regulatory subunit 2 | Cytoplasm           | kinase                  | 5296                            |
| RRAS          | RAS related                                    | Cytoplasm           | enzyme                  | 6237                            |
| RRAS2         | RAS related 2                                  | Plasma Membrane     | enzyme                  | 22800                           |
| SMAD4         | SMAD family member 4                           | Nucleus             | transcription regulator | 4089                            |
| SMURF1        | SMAD specific E3 ubiquitin protein ligase 1    | Cytoplasm           | enzyme                  | 57154                           |
| TCF4          | transcription factor 4                         | Nucleus             | transcription regulator | 6925                            |
| TWIST1        | twist family bHLH transcription factor 1       | Nucleus             | transcription regulator | 7291                            |
| TWIST2        | twist family bHLH transcription factor 2       | Nucleus             | transcription regulator | 117581                          |
| WNT2          | Wnt family member 2                            | Extracellular Space | cytokine                | 7472                            |
| WNT16         | Wnt family member 16                           | Extracellular Space | other                   | 51384                           |
| WNT8B         | Wnt family member 8B                           | Extracellular Space | other                   | 7479                            |
| WNT9A         | Wnt family member 9A                           | Extracellular Space | other                   | 7483                            |

**Table S2: List of significant upstream regulators predicted through IPA based on the hypomethylated or hypomethylated DMRs in chronic WE.**

| <b>Upstream Regulator</b>                    | <b>Molecule Type</b>                | <b>p-value of overlap</b> |
|----------------------------------------------|-------------------------------------|---------------------------|
| TP53                                         | transcription regulator             | 0.0000144                 |
| EGF                                          | growth factor                       | 0.0000244                 |
| URI1                                         | transcription regulator             | 0.0000651                 |
| ESR1                                         | ligand-dependent nuclear receptor   | 0.0000734                 |
| BRCA1                                        | transcription regulator             | 0.000124                  |
| miR-22-3p (miRNAs w/seed AGCUGCC)            | mature microRNA                     | 0.000145                  |
| ADAM10                                       | peptidase                           | 0.000173                  |
| dinoprost                                    | chemical - endogenous mammalian     | 0.000176                  |
| alpha-estradiol                              | chemical - endogenous mammalian     | 0.000186                  |
| TGFB1                                        | growth factor                       | 0.000215                  |
| HIF1A                                        | transcription regulator             | 0.000224                  |
| taxifolin                                    | chemical - endogenous non-mammalian | 0.000225                  |
| FSH                                          | complex                             | 0.000234                  |
| miR-27a-3p (and other miRNAs w/seed UCACAGU) | mature microRNA                     | 0.000365                  |
| HNF4A                                        | transcription regulator             | 0.000531                  |
| flufenamic acid                              | chemical drug                       | 0.000785                  |
| tyrosine kinase                              | group                               | 0.000859                  |
| WT1                                          | transcription regulator             | 0.000887                  |
| puromycin                                    | chemical - endogenous non-mammalian | 0.00093                   |

**Table S3: Genes related to TP53 pathway that were downregulated in chronic WE through RNA-seq analysis**

| <b>Symbol</b> | <b>Entrez Gene Name</b>                                                    | <b>Expr Fold Change</b> | <b>Location</b>     | <b>Type(s)</b>             | <b>Entrez Gene ID for Human</b> |
|---------------|----------------------------------------------------------------------------|-------------------------|---------------------|----------------------------|---------------------------------|
| COQ8A         | coenzyme Q8A                                                               | -1.81                   | Cytoplasm<br>Plasma | kinase                     | 56997                           |
| FGFR2         | fibroblast growth factor receptor 2                                        | -3.92                   | Membrane            | kinase                     | 2263                            |
| GADD45A       | growth arrest and DNA damage inducible<br>alpha                            | -1.5                    | Nucleus             | other<br>transcription     | 1647                            |
| KAT2B         | lysine acetyltransferase 2B                                                | -1.52                   | Nucleus             | regulator<br>transcription | 8850                            |
| PIAS1         | protein inhibitor of activated STAT 1                                      | -1.66                   | Nucleus             | regulator                  | 8554                            |
| PIK3C3        | phosphatidylinositol 3-kinase catalytic<br>subunit type 3                  | -1.49                   | Cytoplasm           | kinase                     | 5289                            |
| PIK3CA        | phosphatidylinositol-4,5-bisphosphate 3-<br>kinase catalytic subunit alpha | -1.64                   | Cytoplasm           | kinase                     | 5290                            |
| PIK3CB        | phosphatidylinositol-4,5-bisphosphate 3-<br>kinase catalytic subunit beta  | -1.86                   | Cytoplasm           | kinase                     | 5291                            |
| STAG1         | stromal antigen 1                                                          | -1.46                   | Nucleus             | transcription<br>regulator | 10274                           |

**Table S4: Genes belonging to EMT pathway hypermethylated and low abundant in chronic WE compared to normal skin**

| <b>Hypermethylated</b> |                                                | <b>Low expression</b> |                                                                        |
|------------------------|------------------------------------------------|-----------------------|------------------------------------------------------------------------|
| <b>Symbol</b>          | <b>Entrez Gene Name</b>                        | <b>Symbol</b>         | <b>Entrez Gene Name</b>                                                |
| ADAM17                 | ADAM metalloproteinase domain 17               | ADAM17                | ADAM metalloproteinase domain 17                                       |
| DVL1                   | dishevelled segment polarity protein 1         |                       | B-Raf proto-oncogene, serine/threonine kinase                          |
| FGFR1                  | fibroblast growth factor receptor 1            | BRAF                  |                                                                        |
| FOXC2                  | forkhead box C2                                | EGFR                  | epidermal growth factor receptor                                       |
| HIF1A                  | hypoxia inducible factor 1 alpha subunit       | FGF2                  | fibroblast growth factor 2                                             |
| KLB                    | klotho beta                                    | FGFR2                 | fibroblast growth factor receptor 2                                    |
| KRAS                   | KRAS proto-oncogene, GTPase                    | FZD10                 | frizzled class receptor 10                                             |
| LOX                    | lysyl oxidase                                  |                       | phosphatidylinositol 3-kinase catalytic subunit type 3                 |
| MAP2K3                 | mitogen-activated protein kinase kinase 3      | PIK3C3                |                                                                        |
| MAP2K5                 | mitogen-activated protein kinase kinase 5      |                       | phosphatidylinositol-4,5-bisphosphate 3-kinase catalytic subunit alpha |
| MET                    | MET proto-oncogene, receptor tyrosine kinase   | PIK3CA                |                                                                        |
| mir-155                | microRNA 155                                   |                       | phosphatidylinositol-4,5-bisphosphate 3-kinase catalytic subunit beta  |
| NFKB2                  | nuclear factor kappa B subunit 2               | PIK3CB                |                                                                        |
| NOTCH4                 | notch 4                                        | SMURF1                | SMAD specific E3 ubiquitin protein ligase 1                            |
| PIK3R2                 | phosphoinositide-3-kinase regulatory subunit 2 | TWIST1                | twist family bHLH transcription factor 1                               |
| RRAS                   | RAS related                                    |                       |                                                                        |
| RRAS2                  | RAS related 2                                  |                       |                                                                        |
| SMAD4                  | SMAD family member 4                           |                       |                                                                        |
| SMURF1                 | SMAD specific E3 ubiquitin protein ligase 1    |                       |                                                                        |
| TCF4                   | transcription factor 4                         |                       |                                                                        |
| TWIST1                 | twist family bHLH transcription factor 1       |                       |                                                                        |
| TWIST2                 | twist family bHLH transcription factor 2       |                       |                                                                        |
| WNT2                   | Wnt family member 2                            |                       |                                                                        |
| WNT16                  | Wnt family member 16                           |                       |                                                                        |
| WNT8B                  | Wnt family member 8B                           |                       |                                                                        |
| WNT9A                  | Wnt family member 9A                           |                       |                                                                        |

**Table S5: cluster 5 (kera 1) vs cluster 6 (kera 2) comparison; + means upregulated in cluster 5**

| Gene      | p_val       | avg_logFC   | p_val_adj   | Description                                                      |
|-----------|-------------|-------------|-------------|------------------------------------------------------------------|
| KRT1      | 2.5423E-218 | 3.128385814 | 6.6649E-214 | keratin 1                                                        |
| KRT10     | 4.143E-192  | 2.941134864 | 1.0861E-187 | keratin 10                                                       |
| DMKN      | 2.3226E-295 | 2.911094476 | 6.089E-291  | dermokine                                                        |
| KRT5      | 7.7929E-292 | 2.864902733 | 2.043E-287  | keratin 5                                                        |
| LGALS7B   | 1.4824E-291 | 2.824944467 | 3.8862E-287 | galectin 7                                                       |
| KRT14     | 2.5128E-205 | 2.702580236 | 6.5875E-201 | keratin 14                                                       |
| KRTDAP    | 3.6954E-141 | 2.45273742  | 9.6878E-137 | keratinocyte differentiation associated protein                  |
| LY6D      | 1.7342E-298 | 2.426880012 | 4.5464E-294 | lymphocyte antigen 6 family member D                             |
| DSP       | 0           | 2.392322267 | 0           | desmoplakin                                                      |
| SFN       | 0           | 2.373954833 | 0           | stratifin                                                        |
| DSC3      | 0           | 2.010354842 | 0           | desmocollin 3                                                    |
| PERP      | 0           | 1.996891897 | 0           | p53 apoptosis effector related to PMP22                          |
| CCL27     | 2.6172E-191 | 1.966346599 | 6.8612E-187 | C-C motif chemokine ligand 27                                    |
| AQP3      | 0           | 1.939206702 | 0           | aquaporin 3 (Gill blood group)                                   |
| CXCL14    | 7.7444E-272 | 1.931920639 | 2.0303E-267 | C-X-C motif chemokine ligand 14                                  |
| DST       | 8.6013E-169 | 1.923490951 | 2.2549E-164 | dystonin                                                         |
| NFKBIA    | 0           | 1.82605017  | 0           | NFKB inhibitor alpha                                             |
| DSG1      | 5.203E-253  | 1.814735474 | 1.364E-248  | desmoglein 1                                                     |
| RND3      | 1.8314E-292 | 1.804489003 | 4.8011E-288 | Rho family GTPase 3                                              |
| ZFP36L1   | 0           | 1.784170161 | 0           | ZFP36 ring finger protein like 1                                 |
| NEAT1     | 4.592E-275  | 1.776554977 | 1.2038E-270 | nuclear paraspeckle assembly transcript 1                        |
| COL17A1   | 8.7409E-162 | 1.758832603 | 2.2915E-157 | collagen type XVII alpha 1 chain                                 |
| S100A14   | 8.628E-271  | 1.746595708 | 2.2619E-266 | S100 calcium binding protein A14                                 |
| SLC38A2   | 0           | 1.725596776 | 0           | solute carrier family 38 member 2                                |
| SERPINB5  | 4.5826E-294 | 1.689940321 | 1.2014E-289 | serpin family B member 5                                         |
| EGR1      | 4.7354E-259 | 1.688249963 | 1.2414E-254 | early growth response 1                                          |
| LGALS7    | 2.2662E-152 | 1.683595367 | 5.941E-148  | galectin 7                                                       |
| FOSB      | 9.02E-272   | 1.677605909 | 2.3647E-267 | FosB proto-oncogene, AP-1 transcription factor subunit           |
| ANXA1     | 3.8911E-304 | 1.649918505 | 1.0201E-299 | annexin A1                                                       |
| INTS6     | 1.0266E-262 | 1.647869382 | 2.6913E-258 | integrator complex subunit 6                                     |
| DUSP1     | 3.2653E-271 | 1.647766597 | 8.5604E-267 | dual specificity phosphatase 1                                   |
| JUN       | 5.8762E-254 | 1.594443197 | 1.5405E-249 | Jun proto-oncogene, AP-1 transcription factor subunit            |
| HOPX      | 2.9461E-246 | 1.583354811 | 7.7235E-242 | HOP homeobox                                                     |
| TNFAIP3   | 1.2489E-232 | 1.572187551 | 3.2742E-228 | TNF alpha induced protein 3                                      |
| ETS2      | 3.2523E-265 | 1.549399427 | 8.5262E-261 | ETS proto-oncogene 2, transcription factor                       |
| KLF4      | 5.8841E-290 | 1.53841172  | 1.5426E-285 | Kruppel like factor 4                                            |
| MYC       | 1.8577E-250 | 1.538061198 | 4.8703E-246 | MYC proto-oncogene, bHLH transcription factor                    |
| DNAJB1    | 4.0021E-278 | 1.525853977 | 1.0492E-273 | DnaJ heat shock protein family (Hsp40) member B1                 |
| KLF5      | 1.6493E-283 | 1.523301319 | 4.3237E-279 | Kruppel like factor 5                                            |
| S100A2    | 3.2698E-132 | 1.50894048  | 8.572E-128  | S100 calcium binding protein A2                                  |
| PKP1      | 2.945E-242  | 1.490587487 | 7.7206E-238 | plakophilin 1                                                    |
| MT1X      | 2.6129E-228 | 1.486867859 | 6.85E-224   | metallothionein 1X                                               |
| JUNB      | 3.0311E-276 | 1.479653963 | 7.9462E-272 | JunB proto-oncogene, AP-1 transcription factor subunit           |
| TACSTD2   | 7.3195E-225 | 1.47960008  | 1.9189E-220 | tumor associated calcium signal transducer 2                     |
| PMAIP1    | 2.835E-231  | 1.476308886 | 7.4322E-227 | phorbol-12-myristate-13-acetate-induced protein 1                |
| ADRB2     | 4.5605E-225 | 1.469381171 | 1.1956E-220 | adrenoceptor beta 2                                              |
| AHNAK     | 1.7752E-272 | 1.461708532 | 4.6539E-268 | AHNAK nucleoprotein                                              |
| HSPB1     | 1.9635E-280 | 1.438036475 | 5.1476E-276 | heat shock protein family B (small) member 1                     |
| GNPMB     | 1.6616E-251 | 1.433926243 | 4.356E-247  | glycoprotein nmb                                                 |
| APOE      | 5.8376E-180 | 1.427522292 | 1.5304E-175 | apolipoprotein E                                                 |
| FGFBP1    | 7.1417E-161 | 1.386946516 | 1.8723E-156 | fibroblast growth factor binding protein 1                       |
| EMP1      | 1.2614E-237 | 1.360974116 | 3.3068E-233 | epithelial membrane protein 1                                    |
| SERPINB2  | 2.7218E-149 | 1.353677131 | 7.1355E-145 | serpin family B member 2                                         |
| CLDN1     | 1.8134E-187 | 1.341750232 | 4.754E-183  | claudin 1                                                        |
| RORA      | 5.5876E-217 | 1.341391161 | 1.4649E-212 | RAR related orphan receptor A                                    |
| HLA-A     | 3.6234E-247 | 1.320879407 | 9.4991E-243 | major histocompatibility complex, class I, A                     |
| PPP1R15A  | 1.1571E-254 | 1.316056654 | 3.0334E-250 | protein phosphatase 1 regulatory subunit 15A                     |
| MAFB      | 5.4311E-198 | 1.302635412 | 1.4238E-193 | MAF bZIP transcription factor B                                  |
| NRARP     | 3.1182E-190 | 1.300996205 | 8.1746E-186 | NOTCH regulated ankyrin repeat protein                           |
| GADD45A   | 1.3797E-169 | 1.291852581 | 3.6169E-165 | growth arrest and DNA damage inducible alpha                     |
| DEGS1     | 1.9831E-226 | 1.291670615 | 5.199E-222  | delta 4-desaturase, sphingolipid 1                               |
| MARCKS    | 1.2207E-224 | 1.286388938 | 3.2002E-220 | myristoylated alanine rich protein kinase C substrate            |
| MTRNR2L12 | 1.4451E-192 | 1.261907059 | 3.7886E-188 | MT-RNR2 like 12                                                  |
| KLF6      | 3.9895E-208 | 1.253365958 | 1.0459E-203 | Kruppel like factor 6                                            |
| MT-CYB    | 1.3667E-210 | 1.242004648 | 3.583E-206  | cytochrome b                                                     |
| B2M       | 8.5201E-283 | 1.23218084  | 2.2336E-278 | beta-2-microglobulin                                             |
| CRIP1     | 3.9058E-176 | 1.230008138 | 1.0239E-171 | cysteine rich protein 1                                          |
| MT-ND2    | 9.4549E-207 | 1.22862365  | 2.4787E-202 | MTND2                                                            |
| PPP1R10   | 2.0576E-204 | 1.228437675 | 5.3941E-200 | protein phosphatase 1 regulatory subunit 10                      |
| SBSN      | 3.49218E-87 | 1.218042984 | 9.1551E-83  | suprabasin                                                       |
| SMG1      | 8.982E-208  | 1.214344341 | 2.3547E-203 | SMG1 nonsense mediated mRNA decay associated PI3K related kinase |
| FUS       | 8.1566E-198 | 1.210524262 | 2.1383E-193 | FUS RNA binding protein                                          |

Table S5

|          |             |             |             |                                                                             |
|----------|-------------|-------------|-------------|-----------------------------------------------------------------------------|
| BTG1     | 1.2178E-218 | 1.205265666 | 3.1925E-214 | BTG anti-proliferation factor 1                                             |
| FOS      | 3.1432E-184 | 1.203264389 | 8.2401E-180 | Fos proto-oncogene, AP-1 transcription factor subunit                       |
| KLF10    | 1.4284E-202 | 1.192641073 | 3.7447E-198 | Kruppel like factor 10                                                      |
| SYNE2    | 4.291E-192  | 1.189818672 | 1.1249E-187 | spectrin repeat containing nuclear envelope protein 2                       |
| ID3      | 2.0141E-182 | 1.18957756  | 5.2802E-178 | inhibitor of DNA binding 3, HLH protein                                     |
| TRIM29   | 3.6941E-214 | 1.189494949 | 9.6844E-210 | tripartite motif containing 29                                              |
| RHOB     | 1.6476E-196 | 1.187345288 | 4.3193E-192 | ras homolog family member B                                                 |
| BRD2     | 5.2021E-202 | 1.186805953 | 1.3638E-197 | bromodomain containing 2                                                    |
| MCL1     | 4.5945E-217 | 1.177214229 | 1.2045E-212 | MCL1 apoptosis regulator, BCL2 family member                                |
| GJA1     | 1.5722E-190 | 1.167653424 | 4.1217E-186 | gap junction protein alpha 1                                                |
| ANXA2    | 6.8346E-254 | 1.163019235 | 1.7918E-249 | annexin A2                                                                  |
| NFKBIZ   | 8.1388E-183 | 1.157200602 | 2.1337E-178 | NFKB inhibitor zeta                                                         |
| AHNAK    | 3.6822E-185 | 1.144951266 | 9.6533E-181 | AHNAK nucleoprotein 2                                                       |
| TXNIP    | 4.9695E-156 | 1.13720137  | 1.3028E-151 | thioredoxin interacting protein                                             |
| MALAT1   | 1.2439E-197 | 1.136114862 | 3.2611E-193 | metastasis associated lung adenocarcinoma transcript 1                      |
| EMP2     | 1.2379E-179 | 1.129802707 | 3.2453E-175 | epithelial membrane protein 2                                               |
| HLA-B    | 8.8141E-224 | 1.128009028 | 2.3107E-219 | major histocompatibility complex, class I, B                                |
| BAZ1A    | 1.2905E-186 | 1.1252208   | 3.3833E-182 | bromodomain adjacent to zinc finger domain 1A                               |
| XIST     | 2.7353E-187 | 1.111543915 | 7.1708E-183 | X inactive specific transcript                                              |
| RSRP1    | 1.7132E-200 | 1.106243517 | 4.4914E-196 | arginine and serine rich protein 1                                          |
| IFRD1    | 3.4551E-179 | 1.103663636 | 9.0579E-175 | interferon related developmental regulator 1                                |
| MFS2D2A  | 3.2168E-203 | 1.094809175 | 8.4332E-199 | major facilitator superfamily domain containing 2A                          |
| MT-CO2   | 2.1273E-190 | 1.094124283 | 5.5768E-186 | cytochrome c oxidase subunit II                                             |
| SPAG9    | 3.5185E-177 | 1.092205836 | 9.224E-173  | sperm associated antigen 9                                                  |
| HEXIM1   | 7.2226E-185 | 1.091257577 | 1.8935E-180 | HEXIM P-TEFb complex subunit 1                                              |
| REL      | 9.4361E-181 | 1.091206151 | 2.4738E-176 | REL proto-oncogene, NF-kB subunit                                           |
| CD55     | 1.3303E-161 | 1.089078503 | 3.4874E-157 | CD55 molecule (Cromer blood group)                                          |
| TLE4     | 6.6846E-185 | 1.072828127 | 1.7524E-180 | TLE family member 4, transcriptional corepressor                            |
| JUP      | 2.9571E-183 | 1.071683749 | 7.7524E-179 | junction plakoglobin                                                        |
| YWHAZ    | 5.1082E-211 | 1.066976571 | 1.3392E-206 | tyrosine 3-monooxygenase/tryptophan 5-monooxygenase activation protein zeta |
| LYPD3    | 1.9498E-132 | 1.065031568 | 5.1116E-128 | LY6/PLAUR domain containing 3                                               |
| MT-ND1   | 9.0471E-185 | 1.056080598 | 2.3718E-180 | NADH dehydrogenase, subunit 1 (complex I)                                   |
| CENL1    | 2.1179E-191 | 1.054460827 | 5.5522E-187 | cyclin L1                                                                   |
| ZFP36    | 1.5668E-192 | 1.05396743  | 4.1076E-188 | ZFP36 ring finger protein                                                   |
| NDRG1    | 1.612E-169  | 1.053657283 | 4.226E-165  | N-myc downstream regulated 1                                                |
| FGFR3    | 5.4977E-186 | 1.051691964 | 1.4413E-181 | fibroblast growth factor receptor 3                                         |
| KRT17    | 2.83557E-30 | 1.050464985 | 7.43372E-26 | keratin 17                                                                  |
| MT-ATP6  | 4.7806E-178 | 1.048358269 | 1.2533E-173 | ATP synthase F0 subunit 6                                                   |
| MT-CO3   | 3.4202E-175 | 1.04750532  | 8.9663E-171 | cytochrome c oxidase III                                                    |
| TP63     | 2.4719E-187 | 1.0447928   | 6.4804E-183 | tumor protein p63                                                           |
| DEFB1    | 8.3688E-130 | 1.038005059 | 2.194E-125  | defensin beta 1                                                             |
| GATA3    | 2.4118E-159 | 1.036904331 | 6.3228E-155 | GATA binding protein 3                                                      |
| IL18     | 9.0235E-187 | 1.035690768 | 2.3656E-182 | interleukin 18                                                              |
| SYT8     | 6.3922E-130 | 1.034952282 | 1.6758E-125 | synaptotagmin 8                                                             |
| ERRF1    | 2.9064E-141 | 1.03407567  | 7.6194E-137 | ERBB receptor feedback inhibitor 1                                          |
| TAF1D    | 8.1665E-172 | 1.032249935 | 2.1409E-167 | TATA-box binding protein associated factor, RNA polymerase I subunit D      |
| MAF      | 1.536E-183  | 1.031172398 | 4.0267E-179 | MAF bZIP transcription factor                                               |
| PLP2     | 3.591E-198  | 1.027017413 | 9.4142E-194 | proteolipid protein 2                                                       |
| MACF1    | 2.7047E-160 | 1.023387791 | 7.0907E-156 | microtubule actin crosslinking factor 1                                     |
| FABP5    | 2.73139E-60 | 1.020253669 | 7.16061E-56 | fatty acid binding protein 5                                                |
| MTRNR2L8 | 2.7339E-123 | 1.011212643 | 7.1673E-119 | MT-RNR2 like 8                                                              |
| EXPH5    | 8.4779E-162 | 1.005288335 | 2.2226E-157 | exophilin 5                                                                 |
| PLK2     | 2.1878E-161 | 1.002954626 | 5.7356E-157 | polo like kinase 2                                                          |
| DAPL1    | 4.5329E-168 | 0.99365852  | 1.1883E-163 | death associated protein like 1                                             |
| TRA2B    | 1.1363E-184 | 0.993649951 | 2.9789E-180 | transformer 2 beta homolog                                                  |
| PLCG2    | 6.89438E-60 | 0.989579999 | 1.80743E-55 | phospholipase C gamma 2                                                     |
| TIPARP   | 1.1994E-175 | 0.988209716 | 3.1445E-171 | TCDD inducible poly(ADP-ribose) polymerase                                  |
| BMP2     | 2.1504E-154 | 0.987835058 | 5.6374E-150 | bone morphogenetic protein 2                                                |
| BCL6     | 2.7018E-168 | 0.987808302 | 7.0831E-164 | BCL6 transcription repressor                                                |
| TENT5B   | 3.6633E-173 | 0.985934801 | 9.6038E-169 | terminal nucleotidyltransferase 5B                                          |
| DSG3     | 1.5149E-159 | 0.979247186 | 3.9715E-155 | desmoglein 3                                                                |
| CLEC2B   | 8.0564E-172 | 0.976876641 | 2.1121E-167 | C-type lectin domain family 2 member B                                      |
| ID1      | 5.5003E-128 | 0.970842684 | 1.442E-123  | inhibitor of DNA binding 1, HLH protein                                     |
| ATP1B3   | 2.4273E-187 | 0.97057322  | 6.3633E-183 | ATPase Na <sup>+</sup> /K <sup>+</sup> transporting subunit beta 3          |
| FBXW7    | 2.5146E-169 | 0.968735031 | 6.5922E-165 | F-box and WD repeat domain containing 7                                     |
| CSTA     | 2.1159E-135 | 0.961804051 | 5.547E-131  | cystatin A                                                                  |
| TPPP3    | 1.8548E-150 | 0.960358057 | 4.8625E-146 | tubulin polymerization promoting protein family member 3                    |
| SFPQ     | 8.3948E-167 | 0.959310978 | 2.2008E-162 | splicing factor proline and glutamine rich                                  |
| KTN1     | 3.3449E-173 | 0.958376166 | 8.7689E-169 | kinectin 1                                                                  |
| TUBA1C   | 1.1218E-172 | 0.957062558 | 2.941E-168  | tubulin alpha 1c                                                            |
| DENN2C   | 2.4221E-157 | 0.956965009 | 6.3499E-153 | DENN domain containing 2C                                                   |
| HNRNPU   | 2.6801E-148 | 0.95426056  | 7.0261E-144 | heterogeneous nuclear ribonucleoprotein U                                   |
| KCNQ1OT1 | 9.591E-110  | 0.952953506 | 2.5144E-105 | KCNQ1 opposite strand/antisense transcript 1                                |
| EZR      | 9.8451E-158 | 0.94968372  | 2.581E-153  | eZRin                                                                       |
| HLA-E    | 1.9623E-199 | 0.946561412 | 5.1443E-195 | major histocompatibility complex, class I, E                                |
| HSPA5    | 4.7471E-163 | 0.942519088 | 1.2445E-158 | heat shock protein family A (Hsp70) member 5                                |

Table S5

|         |             |             |             |                                                     |
|---------|-------------|-------------|-------------|-----------------------------------------------------|
| EPHB6   | 3.1977E-166 | 0.938215341 | 8.3832E-162 | EPH receptor B6                                     |
| HLA-C   | 5.4204E-163 | 0.935831054 | 1.421E-158  | major histocompatibility complex, class I, C        |
| NFE2L2  | 4.9389E-180 | 0.929966666 | 1.2948E-175 | nuclear factor, erythroid 2 like 2                  |
| HES1    | 1.5437E-109 | 0.920876537 | 4.047E-105  | hes family bHLH transcription factor 1              |
| WSB1    | 1.3181E-159 | 0.92004678  | 3.4555E-155 | WD repeat and SOCS box containing 1                 |
| DAAM1   | 8.1303E-157 | 0.912374718 | 2.1314E-152 | dishevelled associated activator of morphogenesis 1 |
| CDHR1   | 6.5365E-155 | 0.909611334 | 1.7136E-150 | cadherin related family member 1                    |
| IFI27   | 1.76168E-42 | 0.905273925 | 4.61842E-38 | interferon alpha inducible protein 27               |
| HNRNPH1 | 4.0982E-147 | 0.904767401 | 1.0744E-142 | heterogeneous nuclear ribonucleoprotein H1          |
| TUBB2A  | 8.3105E-158 | 0.903766076 | 2.1787E-153 | tubulin beta 2A class IIa                           |
| KRT16   | 3.95192E-56 | 0.902520696 | 1.03604E-51 | keratin 16                                          |
| DDX5    | 2.1174E-168 | 0.900180244 | 5.551E-164  | DEAD-box helicase 5                                 |
| AREG    | 6.79142E-65 | 0.8917195   | 1.78044E-60 | amphiregulin                                        |
| BTG2    | 3.8633E-143 | 0.891355213 | 1.0128E-138 | BTG anti-proliferation factor 2                     |
| IER5    | 8.4696E-158 | 0.890963036 | 2.2204E-153 | immediate early response 5                          |
| IRF6    | 2.0427E-158 | 0.889950926 | 5.3553E-154 | interferon regulatory factor 6                      |
| ZNF217  | 1.9613E-122 | 0.889394133 | 5.1419E-118 | zinc finger protein 217                             |
| RAP2B   | 1.3369E-142 | 0.884082405 | 3.5047E-138 | RAP2B, member of RAS oncogene family                |
| MT-ND5  | 2.6702E-158 | 0.881940272 | 7.0002E-154 | NADH dehydrogenase, subunit 5 (complex I)           |
| TRA2A   | 2.1755E-151 | 0.87410021  | 5.7034E-147 | transformer 2 alpha homolog                         |
| DNAJA1  | 2.2939E-143 | 0.872259135 | 6.0136E-139 | DnaJ heat shock protein family (Hsp40) member A1    |
| SON     | 3.5578E-167 | 0.869364466 | 9.3271E-163 | SON DNA and RNA binding protein                     |
| DDX3X   | 1.0386E-152 | 0.868609467 | 2.7227E-148 | DEAD-box helicase 3 X-linked                        |
| IGFBP3  | 9.56697E-49 | 0.857632957 | 2.50808E-44 | insulin like growth factor binding protein 3        |
| MIDN    | 3.2296E-132 | 0.857540022 | 8.4667E-128 | midnolin                                            |
| MT-ND4  | 4.9533E-162 | 0.855013044 | 1.2986E-157 | NADH dehydrogenase, subunit 4 (complex I)           |
| CA12    | 4.1804E-145 | 0.854668401 | 1.0959E-140 | carbonic anhydrase 12                               |
| PCF11   | 3.4233E-130 | 0.852968516 | 8.9746E-126 | PCF11 cleavage and polyadenylation factor subunit   |
| SLC2A1  | 8.0251E-145 | 0.851583027 | 2.1039E-140 | solute carrier family 2 member 1                    |
| IFFO2   | 3.0676E-135 | 0.848236018 | 8.042E-131  | intermediate filament family orphan 2               |
| EPHA2   | 3.855E-129  | 0.84655673  | 1.0106E-124 | EPH receptor A2                                     |
| ZC3H12A | 6.4447E-132 | 0.843354154 | 1.6895E-127 | zinc finger CCCH-type containing 12A                |
| WEE1    | 3.4411E-154 | 0.842584986 | 9.0211E-150 | WEE1 G2 checkpoint kinase                           |
| CDKN1A  | 5.0161E-152 | 0.841755018 | 1.315E-147  | cyclin dependent kinase inhibitor 1A                |
| EGFR    | 7.4072E-145 | 0.840289453 | 1.9419E-140 | epidermal growth factor receptor                    |
| PNRC1   | 4.2278E-163 | 0.8353148   | 1.1084E-158 | proline rich nuclear receptor coactivator 1         |
| MT1E    | 1.2147E-151 | 0.833321037 | 3.1844E-147 | metallothionein 1E                                  |
| KDM6B   | 1.1436E-125 | 0.83197925  | 2.9981E-121 | lysine demethylase 6B                               |
| IER2    | 1.0271E-159 | 0.82441635  | 2.6927E-155 | immediate early response 2                          |
| H2AFX   | 9.3051E-143 | 0.824134041 | 2.4394E-138 | H2A.X variant histone                               |
| MT-ND3  | 8.3745E-148 | 0.823217778 | 2.1955E-143 | NADH dehydrogenase, subunit 3 (complex I)           |
| CCND1   | 5.1003E-111 | 0.81664846  | 1.3371E-106 | cyclin D1                                           |
| CKS2    | 9.585E-126  | 0.813940008 | 2.5128E-121 | CDC28 protein kinase regulatory subunit 2           |
| MT-CO1  | 1.2069E-161 | 0.813294809 | 3.164E-157  | cytochrome c oxidase subunit I                      |
| ALDH3A2 | 2.6149E-141 | 0.810751284 | 6.8552E-137 | aldehyde dehydrogenase 3 family member A2           |
| PHLDA2  | 3.43854E-81 | 0.807264861 | 9.01447E-77 | pleckstrin homology like domain family A member 2   |
| PTP4A1  | 2.3853E-136 | 0.806243945 | 6.2534E-132 | protein tyrosine phosphatase 4A1                    |
| PELI1   | 1.604E-118  | 0.802205402 | 4.205E-114  | pellino E3 ubiquitin protein ligase 1               |
| ANKRD12 | 4.4619E-139 | 0.799915155 | 1.1697E-134 | ankyrin repeat domain 12                            |
| LIMA1   | 3.3287E-120 | 0.798505836 | 8.7266E-116 | LIM domain and actin binding 1                      |
| RPL22L1 | 5.0335E-136 | 0.797088515 | 1.3196E-131 | ribosomal protein L22 like 1                        |
| SDC1    | 2.6834E-122 | 0.79694923  | 7.0348E-118 | syndecan 1                                          |
| DSC1    | 9.24563E-81 | 0.795346732 | 2.42383E-76 | desmocollin 1                                       |
| CHD1    | 4.3784E-120 | 0.7940674   | 1.1478E-115 | chromodomain helicase DNA binding protein 1         |
| ARID5B  | 2.1515E-105 | 0.793241668 | 5.6403E-101 | AT-rich interaction domain 5B                       |
| RPS20   | 4.0126E-131 | 0.792578624 | 1.0519E-126 | ribosomal protein S20                               |
| SOCS3   | 1.40681E-92 | 0.786139912 | 3.68809E-88 | suppressor of cytokine signaling 3                  |
| NUFIP2  | 2.4574E-138 | 0.78364015  | 6.4424E-134 | nuclear FMR1 interacting protein 2                  |
| CSRNP1  | 2.5614E-128 | 0.779622889 | 6.715E-124  | cysteine and serine rich nuclear protein 1          |
| COL7A1  | 4.49841E-80 | 0.776146712 | 1.1793E-75  | collagen type VII alpha 1 chain                     |
| ARL4D   | 1.3189E-124 | 0.773592651 | 3.4577E-120 | ADP ribosylation factor like GTPase 4D              |
| PRNP    | 2.005E-138  | 0.77066369  | 5.2564E-134 | prion protein                                       |
| IRF2BP2 | 1.3123E-143 | 0.766907041 | 3.4403E-139 | interferon regulatory factor 2 binding protein 2    |
| POU3F1  | 4.245E-131  | 0.763529355 | 1.1129E-126 | POU class 3 homeobox 1                              |
| KLF13   | 1.6383E-141 | 0.760720734 | 4.2949E-137 | Kruppel like factor 13                              |
| RPLP1   | 1.5297E-183 | 0.752037207 | 4.0103E-179 | ribosomal protein lateral stalk subunit P1          |
| TOB2    | 1.9225E-116 | 0.751611586 | 5.0399E-112 | transducer of ERBB2, 2                              |
| TMEM154 | 5.5946E-118 | 0.747747701 | 1.4667E-113 | transmembrane protein 154                           |
| CAV1    | 1.1973E-119 | 0.747586992 | 3.1389E-115 | caveolin 1                                          |
| GOLGA4  | 7.1686E-116 | 0.745706103 | 1.8793E-111 | golgin A4                                           |
| FOXQ1   | 2.9956E-115 | 0.744287345 | 7.8532E-111 | forkhead box Q1                                     |
| MT-ND4L | 7.4959E-137 | 0.742970862 | 1.9651E-132 | NADH dehydrogenase, subunit 4L (complex I)          |
| C9orf3  | 6.8234E-136 | 0.742761911 | 1.7888E-131 | aminopeptidase O (putative)                         |
| PABPC1  | 3.3192E-133 | 0.740782556 | 8.7016E-129 | poly(A) binding protein cytoplasmic 1               |
| SERTAD2 | 5.1279E-128 | 0.740340648 | 1.3443E-123 | SERTA domain containing 2                           |
| DDIT4   | 2.6701E-116 | 0.738408557 | 7E-112      | DNA damage inducible transcript 4                   |



Table S5

|          |             |             |             |                                                                |
|----------|-------------|-------------|-------------|----------------------------------------------------------------|
| SNHG12   | 1.19448E-95 | 0.73515988  | 3.13144E-91 | small nucleolar RNA host gene 12                               |
| THBD     | 1.50814E-83 | 0.733501756 | 3.95373E-79 | thrombomodulin                                                 |
| SLC3A2   | 8.7263E-125 | 0.732124389 | 2.2877E-120 | solute carrier family 3 member 2                               |
| SLC20A1  | 1.0591E-103 | 0.731662158 | 2.7767E-99  | solute carrier family 20 member 1                              |
| TGFBI    | 2.07366E-97 | 0.728089861 | 5.4363E-93  | transforming growth factor beta induced                        |
| TAGLN2   | 9.1232E-128 | 0.727335129 | 2.3917E-123 | transgelin 2                                                   |
| PTPN13   | 1.3171E-128 | 0.726872245 | 3.4529E-124 | protein tyrosine phosphatase non-receptor type 13              |
| PPP1R14C | 8.0672E-133 | 0.725200778 | 2.1149E-128 | protein phosphatase 1 regulatory inhibitor subunit 14C         |
| FOXN3    | 7.6304E-129 | 0.72381257  | 2.0004E-124 | forkhead box N3                                                |
| CXADR    | 6.0016E-129 | 0.723383004 | 1.5734E-124 | CXADR Ig-like cell adhesion molecule                           |
| POSTN    | 2.50689E-50 | 0.722254322 | 6.57206E-46 | periostin                                                      |
| MT4      | 3.34571E-66 | 0.721273337 | 8.77111E-62 | metallothionein 4                                              |
| RTN4     | 8.3944E-122 | 0.721225903 | 2.2007E-117 | reticulin 4                                                    |
| ZFP36L2  | 2.3984E-128 | 0.721017985 | 6.2876E-124 | ZFP36 ring finger protein like 2                               |
| EIF4G2   | 6.5729E-123 | 0.719038482 | 1.7232E-118 | eukaryotic translation initiation factor 4 gamma 2             |
| TGIF1    | 2.4375E-122 | 0.715981491 | 6.3902E-118 | TGFB induced factor homeobox 1                                 |
| CYLD     | 3.74793E-97 | 0.713363286 | 9.82556E-93 | CYLD lysine 63 deubiquitinase                                  |
| RBM39    | 3.6425E-132 | 0.712574076 | 9.5492E-128 | RNA binding motif protein 39                                   |
| PTMA     | 2.8491E-236 | 0.712100058 | 7.4691E-232 | prothymosin alpha                                              |
| AMD1     | 7.9831E-115 | 0.711260183 | 2.0928E-110 | adenosylmethionine decarboxylase 1                             |
| LUC7L3   | 9.5074E-115 | 0.709634505 | 2.4925E-110 | LUC7 like 3 pre-mRNA splicing factor                           |
| GOLGB1   | 7.6522E-111 | 0.70947312  | 2.0061E-106 | golgin B1                                                      |
| APCDD1   | 3.6665E-112 | 0.707907607 | 9.6121E-108 | APC down-regulated 1                                           |
| TOR1AIP2 | 9.6742E-113 | 0.702552013 | 2.5362E-108 | torsin 1A interacting protein 2                                |
| TOB1     | 1.2323E-112 | 0.702147795 | 3.2305E-108 | transducer of ERBB2, 1                                         |
| IRX2     | 1.6642E-107 | 0.700844221 | 4.3628E-103 | iroquois homeobox 2                                            |
| GJB3     | 8.1461E-126 | 0.699783312 | 2.1356E-121 | gap junction protein beta 3                                    |
| MBNL1    | 1.7728E-110 | 0.698708856 | 4.6475E-106 | muscleblind like splicing regulator 1                          |
| LONRF1   | 6.415E-112  | 0.691603673 | 1.6817E-107 | LON peptidase N-terminal domain and ring finger 1              |
| MYCBP2   | 3.8988E-107 | 0.69151477  | 1.0221E-102 | MYC binding protein 2                                          |
| HSPH1    | 9.5928E-109 | 0.68979657  | 2.5149E-104 | heat shock protein family H (Hsp110) member 1                  |
| TSC22D2  | 3.6324E-101 | 0.688068677 | 9.52266E-97 | TSC22 domain family member 2                                   |
| CLK1     | 1.0617E-114 | 0.684386846 | 2.7833E-110 | CDC like kinase 1                                              |
| C19orf33 | 1.4107E-108 | 0.683423273 | 3.6983E-104 | chromosome 19 open reading frame 33                            |
| GSTM3    | 6.1801E-118 | 0.682892759 | 1.6202E-113 | glutathione S-transferase mu 3                                 |
| OVOL1    | 1.90945E-96 | 0.682446813 | 5.00582E-92 | ovo like transcriptional repressor 1                           |
| PDLIM1   | 5.2238E-125 | 0.682152146 | 1.3695E-120 | PDZ and LIM domain 1                                           |
| ATP2B4   | 1.0322E-119 | 0.681232309 | 2.7061E-115 | ATPase plasma membrane Ca <sup>2+</sup> transporting 4         |
| LDLR     | 4.7664E-102 | 0.68103751  | 1.24956E-97 | low density lipoprotein receptor                               |
| NXF1     | 3.8946E-105 | 0.680045915 | 1.021E-100  | nuclear RNA export factor 1                                    |
| YBX3     | 3.8791E-130 | 0.678775175 | 1.0169E-125 | Y-box binding protein 3                                        |
| ATP2B1   | 9.9357E-109 | 0.678764055 | 2.6047E-104 | ATPase plasma membrane Ca <sup>2+</sup> transporting 1         |
| CPEB2    | 1.8593E-103 | 0.6787469   | 4.8743E-99  | cytoplasmic polyadenylation element binding protein 2          |
| WNK1     | 7.8318E-115 | 0.677679664 | 2.0532E-110 | WNK lysine deficient protein kinase 1                          |
| CYP3A5   | 1.52599E-88 | 0.669921012 | 4.00053E-84 | cytochrome P450 family 3 subfamily A member 5                  |
| JAG1     | 7.2819E-115 | 0.668737711 | 1.909E-110  | jagged canonical Notch ligand 1                                |
| MYLIP    | 3.3781E-110 | 0.666329081 | 8.8559E-106 | myosin regulatory light chain interacting protein              |
| TAF4B    | 7.21105E-91 | 0.665299044 | 1.89045E-86 | TATA-box binding protein associated factor 4b                  |
| ATF4     | 6.9901E-115 | 0.66526192  | 1.8325E-110 | activating transcription factor 4                              |
| ZBTB7A   | 4.2469E-110 | 0.664263553 | 1.1134E-105 | zinc finger and BTB domain containing 7A                       |
| TNFRSF19 | 1.6285E-115 | 0.66285329  | 4.2694E-111 | TNF receptor superfamily member 19                             |
| CASP14   | 3.57408E-91 | 0.662167971 | 9.3698E-87  | caspase 14                                                     |
| NR1D1    | 2.8502E-100 | 0.660208832 | 7.47205E-96 | nuclear receptor subfamily 1 group D member 1                  |
| BCL11B   | 4.1258E-108 | 0.65912055  | 1.0816E-103 | BAF chromatin remodeling complex subunit BCL11B                |
| NDFIP2   | 1.0533E-122 | 0.65896543  | 2.7612E-118 | Nedd4 family interacting protein 2                             |
| PLS3     | 8.446E-128  | 0.657919049 | 2.2142E-123 | plastin 3                                                      |
| ERF      | 2.32555E-83 | 0.653050205 | 6.09665E-79 | ETS2 repressor factor                                          |
| MAST4    | 1.7509E-105 | 0.652477236 | 4.5902E-101 | microtubule associated serine/threonine kinase family member 4 |
| EFNA1    | 1.6612E-122 | 0.651253541 | 4.3549E-118 | ephrin A1                                                      |
| CSNK1A1  | 2.4606E-106 | 0.650411916 | 6.4506E-102 | casein kinase 1 alpha 1                                        |
| GATM     | 3.55723E-98 | 0.650316513 | 9.32562E-94 | glycine amidinotransferase                                     |
| BTG3     | 3.1439E-108 | 0.646730845 | 8.2421E-104 | BTG anti-proliferation factor 3                                |
| TFAP2A   | 4.9778E-114 | 0.646720983 | 1.305E-109  | transcription factor AP-2 alpha                                |
| LGALS1   | 1.1241E-100 | 0.645541247 | 2.94698E-96 | galectin like                                                  |
| NABP1    | 1.92761E-81 | 0.643310395 | 5.05342E-77 | nucleic acid binding protein 1                                 |
| G3BP1    | 3.8059E-102 | 0.640987087 | 9.9776E-98  | G3BP stress granule assembly factor 1                          |
| SNHG8    | 1.24225E-97 | 0.638576137 | 3.25668E-93 | small nucleolar RNA host gene 8                                |
| NSG1     | 2.7045E-115 | 0.635463137 | 7.0901E-111 | neuronal vesicle trafficking associated 1                      |
| CYR61    | 1.20075E-73 | 0.635248518 | 3.14788E-69 | cellular communication network factor 1                        |
| EIF4A2   | 4.65444E-96 | 0.635105657 | 1.22021E-91 | eukaryotic translation initiation factor 4A2                   |
| EIF3A    | 5.882E-107  | 0.634844659 | 1.542E-102  | eukaryotic translation initiation factor 3 subunit A           |
| NUPR1    | 6.18071E-89 | 0.630408103 | 1.62033E-84 | nuclear protein 1, transcriptional regulator                   |
| IRS2     | 6.222E-102  | 0.630166923 | 1.63116E-97 | insulin receptor substrate 2                                   |
| BBC3     | 2.19356E-90 | 0.628721362 | 5.75063E-86 | BCL2 binding component 3                                       |
| WDR47    | 9.3181E-110 | 0.628677812 | 2.4428E-105 | WD repeat domain 47                                            |
| CAPG     | 2.3338E-121 | 0.627932695 | 6.1182E-117 | capping actin protein, gelsolin like                           |

Table S5

|          |             |             |             |                                                                |
|----------|-------------|-------------|-------------|----------------------------------------------------------------|
| ZBTB43   | 2.25871E-95 | 0.627911092 | 5.92144E-91 | zinc finger and BTB domain containing 43                       |
| HNRNPC   | 7.4929E-106 | 0.626095323 | 1.9644E-101 | heterogeneous nuclear ribonucleoprotein C                      |
| UBC      | 5.4699E-135 | 0.625739536 | 1.434E-130  | ubiquitin C                                                    |
| GNAI1    | 1.6878E-118 | 0.625576633 | 4.4248E-114 | G protein subunit alpha i1                                     |
| RAPGEFL1 | 2.2593E-107 | 0.623270802 | 5.923E-103  | Rap guanine nucleotide exchange factor like 1                  |
| ITPRIP   | 7.38707E-98 | 0.623218616 | 1.93659E-93 | inositol 1,4,5-trisphosphate receptor interacting protein      |
| SRSF2    | 3.5177E-99  | 0.622979167 | 9.22192E-95 | serine and arginine rich splicing factor 2                     |
| BICD2    | 3.4172E-108 | 0.622722923 | 8.9586E-104 | BICD cargo adaptor 2                                           |
| CLCA2    | 1.6322E-105 | 0.621565004 | 4.279E-101  | chloride channel accessory 2                                   |
| HERPUD1  | 1.0601E-109 | 0.618964012 | 2.7791E-105 | homocysteine inducible ER protein with ubiquitin like domain 1 |
| SOX15    | 6.0445E-104 | 0.618131334 | 1.5846E-99  | SRV-box transcription factor 15                                |
| HMGCS1   | 5.91234E-86 | 0.616897985 | 1.54998E-81 | 3-hydroxy-3-methylglutaryl-CoA synthase 1                      |
| EIF4A1   | 3.6067E-112 | 0.615317417 | 9.4554E-108 | eukaryotic translation initiation factor 4A1                   |
| CCDC186  | 7.1005E-107 | 0.614812808 | 1.8615E-102 | coiled-coil domain containing 186                              |
| ABI1     | 6.5841E-103 | 0.614081727 | 1.72609E-98 | abl interactor 1                                               |
| NECTIN1  | 1.1462E-109 | 0.613395516 | 3.0049E-105 | nectin cell adhesion molecule 1                                |
| GPBP1    | 2.3124E-100 | 0.613264517 | 6.06209E-96 | GC-rich promoter binding protein 1                             |
| MT2A     | 2.3963E-109 | 0.611275405 | 6.2822E-105 | metallothionein 2A                                             |
| HSPA2    | 1.29289E-97 | 0.610771344 | 3.38945E-93 | heat shock protein family A (Hsp70) member 2                   |
| DDX21    | 9.261E-99   | 0.610292884 | 2.42787E-94 | DExD-box helicase 21                                           |
| AKAP9    | 1.3922E-103 | 0.610278432 | 3.6498E-99  | A-kinase anchoring protein 9                                   |
| PER1     | 4.87698E-86 | 0.608378322 | 1.27855E-81 | period circadian regulator 1                                   |
| ACTN4    | 3.1772E-110 | 0.607293793 | 8.3295E-106 | actinin alpha 4                                                |
| ETV3     | 1.9128E-104 | 0.605757607 | 5.0147E-100 | ETS variant transcription factor 3                             |
| ITM2B    | 1.41378E-95 | 0.605705735 | 3.70637E-91 | integral membrane protein 2B                                   |
| KDSR     | 3.5639E-99  | 0.604611712 | 9.34325E-95 | 3-ketodihydrospingosine reductase                              |
| IFI16    | 3.8119E-106 | 0.604324829 | 9.9932E-102 | interferon gamma inducible protein 16                          |
| TRIM28   | 1.44153E-96 | 0.603855629 | 3.77912E-92 | tripartite motif containing 28                                 |
| CYB5R1   | 1.9412E-103 | 0.602122192 | 5.089E-99   | cytochrome b5 reductase 1                                      |
| KLHL21   | 3.10797E-79 | 0.60191746  | 8.14785E-75 | kelch like family member 21                                    |
| CEBPA    | 5.3298E-104 | 0.601273553 | 1.3973E-99  | CCAAT enhancer binding protein alpha                           |
| KCNK7    | 1.88939E-86 | 0.600961857 | 4.95321E-82 | potassium two pore domain channel subfamily K member 7         |
| SF1      | 9.1586E-109 | 0.599625002 | 2.401E-104  | splicing factor 1                                              |
| CHD2     | 1.07338E-87 | 0.599238173 | 2.81398E-83 | chromodomain helicase DNA binding protein 2                    |
| SPINK5   | 2.71908E-49 | 0.598582239 | 7.12834E-45 | serine peptidase inhibitor Kazal type 5                        |
| DUSP7    | 2.1486E-101 | 0.595505724 | 5.63271E-97 | dual specificity phosphatase 7                                 |
| WFDPC5   | 1.7809E-76  | 0.595013926 | 4.6688E-72  | WAP four-disulfide core domain 5                               |
| MT1G     | 1.02544E-91 | 0.594397658 | 2.68829E-87 | metallothionein 1G                                             |
| PKP3     | 6.5564E-108 | 0.593582715 | 1.7188E-103 | plakophilin 3                                                  |
| ZNF706   | 1.8165E-108 | 0.591372946 | 4.7622E-104 | zinc finger protein 706                                        |
| HBEGF    | 1.30496E-70 | 0.591020867 | 3.42108E-66 | heparin binding EGF like growth factor                         |
| ARL5B    | 8.02363E-85 | 0.590858237 | 2.10347E-80 | ADP ribosylation factor like GTPase 5B                         |
| ABLIM1   | 5.65529E-92 | 0.590454948 | 1.48259E-87 | actin binding LIM protein 1                                    |
| MED13L   | 3.38455E-93 | 0.587813376 | 8.87293E-89 | mediator complex subunit 13L                                   |
| TENT5A   | 1.32484E-86 | 0.58734035  | 3.47321E-82 | terminal nucleotidyltransferase 5A                             |
| TNS4     | 7.79597E-85 | 0.585550564 | 2.04379E-80 | tensin 4                                                       |
| EFNB2    | 3.22168E-85 | 0.585427339 | 8.44595E-81 | ephrin B2                                                      |
| SPEN     | 1.07072E-81 | 0.584251419 | 2.807E-77   | spen family transcriptional repressor                          |
| DYNLL1   | 1.52849E-90 | 0.581562297 | 4.00709E-86 | dynein light chain LC8-type 1                                  |
| RXRA     | 1.14422E-98 | 0.580944832 | 2.99968E-94 | retinoid X receptor alpha                                      |
| RPL23    | 9.24392E-83 | 0.580922223 | 2.42339E-78 | ribosomal protein L23                                          |
| QKI      | 1.42172E-95 | 0.580303183 | 3.72719E-91 | QKI, KH domain containing RNA binding                          |
| CBX4     | 4.51694E-92 | 0.579236934 | 1.18416E-87 | chromobox 4                                                    |
| NPEPPS   | 4.1922E-99  | 0.579044221 | 1.09903E-94 | aminopeptidase puromycin sensitive                             |
| MAPK6    | 5.97452E-97 | 0.578887593 | 1.56628E-92 | mitogen-activated protein kinase 6                             |
| MIR22HG  | 2.1347E-101 | 0.57692304  | 5.59622E-97 | MIR22 host gene                                                |
| CAPNS2   | 4.8439E-101 | 0.576843824 | 1.26986E-96 | calpain small subunit 2                                        |
| ELL2     | 5.53302E-78 | 0.576573818 | 1.45054E-73 | elongation factor for RNA polymerase II 2                      |
| TINCR    | 5.2343E-108 | 0.574768336 | 1.3722E-103 | TINCR ubiquitin domain containing                              |
| SQSTM1   | 1.16055E-74 | 0.572192643 | 3.0425E-70  | sequestosome 1                                                 |
| BCLAF1   | 6.90559E-90 | 0.569579478 | 1.81037E-85 | BCL2 associated transcription factor 1                         |
| C6orf62  | 2.58244E-85 | 0.568302348 | 6.77012E-81 | chromosome 6 open reading frame 62                             |
| EPN2     | 5.6001E-104 | 0.56823092  | 1.4681E-99  | epsin 2                                                        |
| IL1RN    | 6.38818E-96 | 0.567788627 | 1.67473E-91 | interleukin 1 receptor antagonist                              |
| TOP1     | 1.90457E-86 | 0.567609692 | 4.99301E-82 | DNA topoisomerase I                                            |
| CHD4     | 2.45518E-84 | 0.566986243 | 6.4365E-80  | chromodomain helicase DNA binding protein 4                    |
| EPPK1    | 3.26661E-68 | 0.566016294 | 8.56373E-64 | epiplakin 1                                                    |
| MEF2A    | 1.22668E-80 | 0.565085399 | 3.21587E-76 | myocyte enhancer factor 2A                                     |
| MTDH     | 1.1777E-106 | 0.563018875 | 3.0876E-102 | metadherin                                                     |
| ING1     | 7.3913E-104 | 0.562978846 | 1.9377E-99  | inhibitor of growth family member 1                            |
| TUBA1A   | 5.38742E-90 | 0.562894199 | 1.41237E-85 | tubulin alpha 1a                                               |
| FLNA     | 4.94095E-82 | 0.562500486 | 1.29532E-77 | filamin A                                                      |
| ITGA6    | 1.09911E-70 | 0.56169642  | 2.88142E-66 | integrin subunit alpha 6                                       |
| SYNCRIP  | 6.3004E-99  | 0.561501746 | 1.65171E-94 | synaptotagmin binding cytoplasmic RNA interacting protein      |
| HLA-F    | 1.4907E-104 | 0.561257763 | 3.9081E-100 | major histocompatibility complex, class I, F                   |
| LMNA     | 3.66115E-94 | 0.561187605 | 9.59807E-90 | lamin A/C                                                      |

Table S5

|            |             |             |             |                                                         |
|------------|-------------|-------------|-------------|---------------------------------------------------------|
| PLEC       | 3.17841E-91 | 0.560647929 | 8.33252E-87 | plectin                                                 |
| CDH1       | 7.09423E-90 | 0.560396934 | 1.85982E-75 | cadherin 1                                              |
| ZNF207     | 3.18826E-95 | 0.560231845 | 8.35834E-91 | zinc finger protein 207                                 |
| RAB10      | 9.6269E-100 | 0.559202478 | 2.5238E-95  | RAB10, member RAS oncogene family                       |
| KLF9       | 2.78221E-85 | 0.559054529 | 7.29385E-81 | Kruppel like factor 9                                   |
| GABPB1-AS1 | 5.31807E-65 | 0.558642288 | 1.39418E-60 | GABPB1 antisense RNA 1                                  |
| IL20RB     | 3.8935E-99  | 0.55763581  | 1.02073E-94 | interleukin 20 receptor subunit beta                    |
| WNT4       | 1.29353E-89 | 0.557286916 | 3.39113E-85 | Wnt family member 4                                     |
| TMEM43     | 2.1759E-101 | 0.557136849 | 5.70438E-97 | transmembrane protein 43                                |
| BAIAP2     | 8.68538E-94 | 0.555907173 | 2.27696E-89 | BAR/IMD domain containing adaptor protein 2             |
| GAS6       | 2.63476E-92 | 0.554593022 | 6.0728E-88  | growth arrest specific 6                                |
| NFAT5      | 8.19717E-85 | 0.55457718  | 2.14897E-80 | nuclear factor of activated T cells 5                   |
| YME1L1     | 8.36864E-93 | 0.554111465 | 2.19392E-88 | YME1 like 1 ATPase                                      |
| FOSL2      | 5.50263E-89 | 0.553276205 | 1.44257E-84 | FOS like 2, AP-1 transcription factor subunit           |
| DDX17      | 1.10886E-96 | 0.552613205 | 2.907E-92   | DEAD-box helicase 17                                    |
| BAG3       | 4.44054E-87 | 0.55245327  | 1.16413E-82 | BAG cochaperone 3                                       |
| GPC1       | 2.06269E-89 | 0.551465366 | 5.40755E-85 | glypican 1                                              |
| RBM25      | 1.39365E-94 | 0.551421581 | 3.6536E-90  | RNA binding motif protein 25                            |
| ARID1B     | 1.89841E-91 | 0.551331016 | 4.97688E-87 | AT-rich interaction domain 1B                           |
| SNHG15     | 2.31876E-91 | 0.551296006 | 6.07886E-87 | small nucleolar RNA host gene 15                        |
| MSN        | 1.34715E-94 | 0.550959743 | 3.5317E-90  | moesin                                                  |
| RPLP0      | 1.9657E-115 | 0.550399664 | 5.1534E-111 | ribosomal protein lateral stalk subunit P0              |
| SRPL3      | 3.15798E-93 | 0.550320587 | 8.27896E-89 | signal peptide peptidase like 3                         |
| SRSF3      | 1.34453E-89 | 0.549499859 | 3.52481E-85 | serine and arginine rich splicing factor 3              |
| PRRC2C     | 1.5046E-104 | 0.547881603 | 3.9445E-100 | proline rich coiled-coil 2C                             |
| EIF5       | 5.61099E-88 | 0.547094773 | 1.47098E-83 | eukaryotic translation initiation factor 5              |
| TFAP2C     | 1.51738E-95 | 0.545544599 | 3.97796E-91 | transcription factor AP-2 gamma                         |
| IVNS1ABP   | 1.85559E-74 | 0.544611487 | 4.86462E-70 | influenza virus NS1A binding protein                    |
| YY1        | 1.36259E-93 | 0.544151135 | 3.57217E-89 | YY1 transcription factor                                |
| PCDH7      | 1.19204E-81 | 0.543831732 | 3.12504E-77 | protocadherin 7                                         |
| UBR5       | 1.51576E-77 | 0.543583777 | 3.97371E-73 | ubiquitin protein ligase E3 component n-recognin 5      |
| RBBP6      | 2.6081E-91  | 0.542688534 | 6.83739E-87 | RB binding protein 6, ubiquitin ligase                  |
| ZFC3H1     | 6.4204E-79  | 0.539677756 | 1.68317E-74 | zinc finger C3H1-type containing                        |
| PPP1R13L   | 5.7297E-101 | 0.538674581 | 1.50211E-96 | protein phosphatase 1 regulatory subunit 13 like        |
| KMT2E      | 8.8416E-96  | 0.538103677 | 2.31791E-91 | lysine methyltransferase 2E (inactive)                  |
| CDKN2AIP   | 6.68058E-86 | 0.537949269 | 1.75138E-81 | CDKN2A interacting protein                              |
| ITGB1      | 2.42329E-76 | 0.53691482  | 6.35291E-67 | integrin subunit beta 1                                 |
| S100A16    | 7.0331E-81  | 0.536895271 | 1.8438E-76  | S100 calcium binding protein A16                        |
| ADM        | 2.75115E-69 | 0.536542207 | 7.21243E-65 | adrenomedullin                                          |
| SYTL1      | 2.3844E-100 | 0.536484202 | 6.25106E-96 | synaptotagmin like 1                                    |
| RB1CC1     | 1.09986E-87 | 0.536174805 | 2.88339E-83 | RB1 inducible coiled-coil 1                             |
| IMPA2      | 4.33453E-96 | 0.535202064 | 1.13634E-91 | inositol monophosphatase 2                              |
| POLR2A     | 1.513E-75   | 0.534892787 | 3.96648E-71 | RNA polymerase II subunit A                             |
| NASP       | 1.36391E-90 | 0.534660257 | 3.57562E-86 | nuclear autoantigenic sperm protein                     |
| DNAJB4     | 1.34556E-88 | 0.533663918 | 3.52752E-84 | DnaJ heat shock protein family (Hsp40) member B4        |
| LRRRC8A    | 3.38082E-79 | 0.532925271 | 8.86315E-75 | leucine rich repeat containing 8 VRAC subunit A         |
| JMJD1C     | 3.31161E-81 | 0.532710875 | 8.68171E-77 | jumonji domain containing 1C                            |
| LSP1       | 7.39094E-88 | 0.531807208 | 1.93761E-83 | lymphocyte specific protein 1                           |
| CTNBP1     | 1.60362E-80 | 0.531281073 | 4.20406E-76 | catenin beta interacting protein 1                      |
| AFF4       | 7.65759E-87 | 0.530972902 | 2.00751E-82 | AF4/FMR2 family member 4                                |
| NAB1       | 8.05537E-90 | 0.529922571 | 2.1118E-85  | NGFI-A binding protein 1                                |
| ZNF703     | 1.66191E-79 | 0.52912972  | 4.35686E-75 | zinc finger protein 703                                 |
| HBP1       | 9.11791E-96 | 0.527064144 | 2.39035E-91 | HMG-box transcription factor 1                          |
| KMT2C      | 4.52865E-83 | 0.526554487 | 1.18723E-78 | lysine methyltransferase 2C                             |
| MIR222HG   | 4.75943E-70 | 0.52646641  | 1.24773E-65 |                                                         |
| ID2        | 4.70592E-67 | 0.525252908 | 1.2337E-62  | inhibitor of DNA binding 2                              |
| PRRG4      | 5.58799E-85 | 0.524871902 | 1.46495E-80 | proline rich and Gla domain 4                           |
| CHMP1B     | 4.71815E-86 | 0.524659398 | 1.23691E-81 | charged multivesicular body protein 1B                  |
| HSP90AA1   | 2.72032E-76 | 0.523116636 | 7.13159E-72 | heat shock protein 90 alpha family class A member 1     |
| LAMA3      | 1.34591E-66 | 0.522232992 | 3.52843E-62 | laminin subunit alpha 3                                 |
| HNRNPAB    | 2.50743E-90 | 0.521511513 | 6.57348E-86 | heterogeneous nuclear ribonucleoprotein A/B             |
| BCL11A     | 1.29743E-84 | 0.518573676 | 3.40135E-79 | BAF chromatin remodeling complex subunit BCL11A         |
| TNKS1BP1   | 2.21056E-83 | 0.518219296 | 5.7952E-80  | tankyrase 1 binding protein 1                           |
| TNFAIP8    | 6.30192E-79 | 0.517315794 | 1.65211E-74 | TNF alpha induced protein 8                             |
| ZBTB11     | 1.02917E-87 | 0.516902133 | 2.69808E-83 | zinc finger and BTB domain containing 11                |
| EDN1       | 4.71146E-62 | 0.515424746 | 1.23516E-57 | endothelin 1                                            |
| RSRC2      | 1.15419E-86 | 0.515125501 | 3.02583E-82 | arginine and serine rich coiled-coil 2                  |
| SRRM2      | 5.76868E-89 | 0.514417327 | 1.51232E-84 | serine/arginine repetitive matrix 2                     |
| MAL2       | 1.38804E-70 | 0.513890325 | 3.63889E-66 | mal, T cell differentiation protein 2 (gene/pseudogene) |
| MED13      | 9.80976E-84 | 0.513810806 | 2.57173E-79 | mediator complex subunit 13                             |
| LUZP1      | 1.37407E-80 | 0.51363939  | 3.60226E-76 | leucine zipper protein 1                                |
| LAMP1      | 5.41187E-84 | 0.512438683 | 1.41878E-79 | lysosomal associated membrane protein 1                 |
| ARIH1      | 1.20518E-90 | 0.509512084 | 3.1595E-86  | ariadne RBR E3 ubiquitin protein ligase 1               |
| KDM3A      | 6.99798E-76 | 0.509394291 | 1.83459E-71 | lysine demethylase 3A                                   |
| NOLC1      | 1.03315E-74 | 0.508491958 | 2.70849E-70 | nucleolar and coiled-body phosphoprotein 1              |
| ZNF750     | 1.92893E-64 | 0.505715851 | 5.05688E-60 | zinc finger protein 750                                 |

Table S5

|           |             |              |             |                                                             |
|-----------|-------------|--------------|-------------|-------------------------------------------------------------|
| PNRC2     | 4.31158E-72 | 0.502803822  | 1.13032E-67 | proline rich nuclear receptor coactivator 2                 |
| ELF1      | 1.54744E-89 | 0.50275875   | 4.05678E-85 | E74 like ETS transcription factor 1                         |
| NR3C1     | 3.88261E-90 | 0.50269704   | 1.01786E-85 | nuclear receptor subfamily 3 group C member 1               |
| CREBRF    | 5.25602E-68 | 0.500977558  | 1.37792E-63 | CREB3 regulatory factor                                     |
| HNRNPA0   | 5.50244E-94 | 0.500344913  | 1.44252E-89 | heterogeneous nuclear ribonucleoprotein A0                  |
| LYPLA1    | 1.46963E-08 | -0.500809382 | 0.000385278 | lysophospholipase 1                                         |
| SOD2      | 1.24914E-21 | -0.502911103 | 3.27474E-17 | superoxide dismutase 2                                      |
| SELENOH   | 3.5148E-10  | -0.503843768 | 9.21441E-06 | selenoprotein H                                             |
| SLC25A6   | 3.79825E-36 | -0.504139786 | 9.95749E-32 | solute carrier family 25 member 6                           |
| GABARAPL1 | 7.8575E-18  | -0.505075442 | 2.05992E-13 | GABA type A receptor associated protein like 1              |
| TPT1      | 3.8624E-118 | -0.505273941 | 1.0126E-113 | tumor protein, translationally-controlled 1                 |
| FDFT1     | 3.76011E-10 | -0.505677634 | 9.8575E-06  | farnesyl-diphosphate farnesyltransferase 1                  |
| ACAA1     | 3.18291E-16 | -0.507821816 | 8.34431E-12 | acetyl-CoA acyltransferase 1                                |
| LAMTOR5   | 3.4847E-08  | -0.508733961 | 0.000913548 | late endosomal/lysosomal adaptor, MAPK and MTOR activator 5 |
| DDAH2     | 6.46027E-14 | -0.509314385 | 1.69362E-09 | dimethylarginine dimethylaminohydrolase 2                   |
| SERPINB1  | 3.82069E-07 | -0.51077363  | 0.010016312 | serpin family B member 1                                    |
| RPL19     | 2.9063E-123 | -0.511010874 | 7.6191E-119 | ribosomal protein L19                                       |
| CIB1      | 4.21901E-16 | -0.513053888 | 1.10605E-11 | calcium and integrin binding 1                              |
| PCBD1     | 2.87721E-15 | -0.514598243 | 7.54291E-11 | pterin-4 alpha-carbinolamine dehydratase 1                  |
| MRPL14    | 3.94662E-07 | -0.514667377 | 0.010346468 | mitochondrial ribosomal protein L14                         |
| RPS10     | 2.1036E-89  | -0.515081289 | 5.51479E-85 | ribosomal protein S10                                       |
| PSMC5     | 1.6516E-08  | -0.517430597 | 0.000432984 | proteasome 26S subunit, ATPase 5                            |
| GLS       | 8.61275E-08 | -0.519588244 | 0.00225792  | glutaminase                                                 |
| SEC61G    | 1.24028E-13 | -0.519669639 | 3.25151E-09 | SEC61 translocon subunit gamma                              |
| PRDX6     | 6.13079E-16 | -0.520366785 | 1.60725E-11 | peroxiredoxin 6                                             |
| TCEA3     | 4.76209E-12 | -0.521230054 | 1.24843E-07 | transcription elongation factor A3                          |
| NEDD8     | 4.63854E-16 | -0.52225308  | 1.21604E-11 | NEDD8 ubiquitin like modifier                               |
| POLR2I    | 4.10989E-10 | -0.522677838 | 1.07745E-05 | RNA polymerase II subunit I                                 |
| COA1      | 2.61908E-27 | -0.52332215  | 6.86617E-23 | cytochrome c oxidase assembly factor 1 homolog              |
| SEC11C    | 4.65806E-15 | -0.523930043 | 1.22116E-10 | SEC11 homolog C, signal peptidase complex subunit           |
| NDUFB6    | 3.05173E-11 | -0.524658859 | 8.00042E-07 | NADH:ubiquinone oxidoreductase subunit B6                   |
| OST4      | 2.82134E-38 | -0.524786126 | 7.39642E-34 | oligosaccharyltransferase complex subunit 4, non-catalytic  |
| CALM1     | 1.79907E-57 | -0.525100545 | 4.71645E-53 | calmodulin 1                                                |
| NDUFA7    | 7.53145E-31 | -0.527788728 | 1.97444E-26 | NADH:ubiquinone oxidoreductase subunit A7                   |
| ALDOA     | 4.79327E-12 | -0.527872383 | 1.2566E-07  | aldolase, fructose-bisphosphate A                           |
| DNPH1     | 4.12081E-12 | -0.527915374 | 1.08031E-07 | 2'-deoxynucleoside 5'-phosphate N-hydrolase 1               |
| GTF3C6    | 6.88833E-12 | -0.529246784 | 1.80585E-07 | general transcription factor IIIC subunit 6                 |
| NAA38     | 2.69286E-11 | -0.529556744 | 7.0596E-07  | N-alpha-acetyltransferase 38, NatC auxiliary subunit        |
| SEC61B    | 8.04779E-19 | -0.53068236  | 2.10981E-14 | SEC61 translocon subunit beta                               |
| FDPS      | 7.41114E-09 | -0.532078388 | 0.00019429  | farnesyl diphosphate synthase                               |
| S100A6    | 1.34302E-97 | -0.532347322 | 3.52087E-93 | S100 calcium binding protein A6                             |
| MRPL21    | 1.01073E-13 | -0.533038707 | 2.64974E-09 | mitochondrial ribosomal protein L21                         |
| MRPS15    | 4.29109E-14 | -0.534070309 | 1.12495E-09 | mitochondrial ribosomal protein S15                         |
| ANXA5     | 2.91577E-21 | -0.534907288 | 7.64399E-17 | annexin A5                                                  |
| FIS1      | 1.17306E-13 | -0.535630959 | 3.0753E-09  | fission, mitochondrial 1                                    |
| TMA7      | 6.9373E-61  | -0.53567058  | 1.81868E-56 | translation machinery associated 7 homolog                  |
| CAMTA1    | 8.5204E-11  | -0.535793323 | 2.23371E-06 | calmodulin binding transcription activator 1                |
| MRPS7     | 1.83744E-20 | -0.536111966 | 4.81703E-16 | mitochondrial ribosomal protein S7                          |
| FAM96A    | 1.14394E-26 | -0.536575827 | 2.99896E-22 | cytosolic iron-sulfur assembly component 2A                 |
| NDFIP1    | 8.84711E-12 | -0.540322628 | 2.31936E-07 | Nedd4 family interacting protein 1                          |
| CCNB1IP1  | 7.27391E-12 | -0.540506225 | 1.90693E-07 | cyclin B1 interacting protein 1                             |
| CLDN7     | 2.52534E-51 | -0.542805938 | 6.62044E-47 | claudin 7                                                   |
| POLR2K    | 1.10357E-10 | -0.543748855 | 2.89311E-06 | RNA polymerase II subunit K                                 |
| TALDO1    | 7.8801E-12  | -0.54446376  | 2.06585E-07 | transaldolase 1                                             |
| CAPNS1    | 1.02454E-24 | -0.544696064 | 2.68593E-20 | calpain small subunit 1                                     |
| MRPL40    | 1.67339E-14 | -0.549488914 | 4.38697E-10 | mitochondrial ribosomal protein L40                         |
| GTF2A2    | 5.10796E-12 | -0.550447308 | 1.3391E-07  | general transcription factor IIA subunit 2                  |
| PGAM1     | 1.55945E-12 | -0.552188006 | 4.08825E-08 | phosphoglycerate mutase 1                                   |
| SDCBP     | 5.4732E-15  | -0.554004088 | 1.43485E-10 | syndecan binding protein                                    |
| HEBP2     | 1.16289E-17 | -0.558260622 | 3.04862E-13 | heme binding protein 2                                      |
| CFL1      | 5.07665E-50 | -0.558446916 | 1.33089E-45 | cofilin 1                                                   |
| MRPL12    | 9.43278E-24 | -0.558776174 | 2.4729E-19  | mitochondrial ribosomal protein L12                         |
| SSU72     | 2.64685E-13 | -0.560417094 | 6.93899E-09 | SSU72 homolog, RNA polymerase II CTD phosphatase            |
| SCP2      | 7.95855E-15 | -0.562182598 | 2.08641E-10 | sterol carrier protein 2                                    |
| SUMO1     | 1.69296E-12 | -0.562245929 | 4.43827E-08 | small ubiquitin like modifier 1                             |
| SUCLA2    | 3.80945E-17 | -0.562310155 | 9.98686E-13 | succinate-CoA ligase ADP-forming subunit beta               |
| MTIF3     | 3.27582E-10 | -0.562389257 | 8.5879E-06  | mitochondrial translational initiation factor 3             |
| MORF4L1   | 1.61604E-17 | -0.562860791 | 4.23661E-13 | mortality factor 4 like 1                                   |
| CA2       | 3.82475E-17 | -0.566645502 | 1.0027E-12  | carbonic anhydrase 2                                        |
| SDHC      | 6.42583E-15 | -0.567472408 | 1.68459E-10 | succinate dehydrogenase complex subunit C                   |
| COP9      | 7.22747E-16 | -0.567480471 | 1.89475E-11 | COP9 signalosome subunit 9                                  |
| C7orf50   | 1.64784E-31 | -0.56805317  | 4.31999E-27 | chromosome 7 open reading frame 50                          |
| TMEM14B   | 1.74972E-13 | -0.568583025 | 4.58707E-09 | transmembrane protein 14B                                   |
| WWC1      | 1.85043E-44 | -0.569202808 | 4.85108E-40 | WW and C2 domain containing 1                               |
| RABEP1    | 7.0807E-30  | -0.569572437 | 1.85628E-25 | rabaptin, RAB GTPase binding effector protein 1             |
| EPCAM     | 1.54517E-39 | -0.57223906  | 4.05081E-35 | epithelial cell adhesion molecule                           |

Table S5

|            |             |              |             |                                                                    |
|------------|-------------|--------------|-------------|--------------------------------------------------------------------|
| FAM114A1   | 1.17905E-35 | -0.572565007 | 3.091E-31   | family with sequence similarity 114 member A1                      |
| COX20      | 1.26794E-10 | -0.572750211 | 3.32404E-06 | cytochrome c oxidase assembly factor COX20                         |
| KCNN4      | 8.401E-106  | -0.574056586 | 2.2024E-101 | potassium calcium-activated channel subfamily N member 4           |
| GMPR       | 6.3417E-88  | -0.574461485 | 1.66254E-83 | guanosine monophosphate reductase                                  |
| PSMA7      | 8.89072E-24 | -0.574966374 | 2.33079E-19 | proteasome 20S subunit alpha 7                                     |
| C1orf43    | 1.08329E-10 | -0.575187181 | 2.83995E-06 | chromosome 1 open reading frame 43                                 |
| AP2M1      | 9.67178E-12 | -0.576656236 | 2.53555E-07 | adaptor related protein complex 2 subunit mu 1                     |
| SLC25A11   | 1.66991E-15 | -0.580828315 | 4.37783E-11 | solute carrier family 25 member 11                                 |
| FMC1       | 7.68252E-22 | -0.581074395 | 2.01405E-17 | formation of mitochondrial complex V assembly factor 1 homolog     |
| HMGN1      | 2.5718E-24  | -0.582737073 | 6.74224E-20 | high mobility group nucleosome binding domain 1                    |
| VDAC3      | 1.02717E-11 | -0.583136848 | 2.69283E-07 | voltage dependent anion channel 3                                  |
| OAZ1       | 1.97214E-79 | -0.583373116 | 5.17016E-75 | ornithine decarboxylase antizyme 1                                 |
| COX7A2L    | 2.18739E-14 | -0.585215532 | 5.73445E-10 | cytochrome c oxidase subunit 7A2 like                              |
| BLOC1S1    | 2.71164E-13 | -0.585679999 | 7.10884E-09 | biogenesis of lysosomal organelles complex 1 subunit 1             |
| MB         | 8.059E-122  | -0.586091504 | 2.1127E-117 | myoglobin                                                          |
| FTH1       | 6.3638E-168 | -0.586235971 | 1.6683E-163 | ferritin heavy chain 1                                             |
| MOC52      | 8.5978E-36  | -0.586263323 | 2.254E-31   | molybdenum cofactor synthesis 2                                    |
| SMIM37     | 2.54899E-11 | -0.587063968 | 6.68243E-07 | mitoregulin                                                        |
| LAMTOR1    | 1.3097E-14  | -0.587463418 | 3.43352E-10 | late endosomal/lysosomal adaptor, MAPK and MTOR activator 1        |
| ARHGDI3    | 7.85687E-37 | -0.587900602 | 2.05976E-32 | Rho GDP dissociation inhibitor beta                                |
| METTL5     | 8.52638E-16 | -0.588785602 | 2.23527E-11 | methyltransferase like 5                                           |
| PYGB       | 4.9553E-26  | -0.589273033 | 1.29908E-21 | glycogen phosphorylase B                                           |
| GTF2H5     | 5.02151E-14 | -0.589370959 | 1.31644E-09 | general transcription factor IIH subunit 5                         |
| NDUF81     | 3.32376E-26 | -0.593868107 | 8.71357E-22 | NADH:ubiquinone oxidoreductase subunit B11                         |
| PRDX1      | 4.15509E-67 | -0.594389996 | 1.0893E-62  | peroxiredoxin 1                                                    |
| HIGD2A     | 4.94534E-17 | -0.594963271 | 1.29647E-12 | HIG1 hypoxia inducible domain family member 2A                     |
| ARPC3      | 4.8225E-31  | -0.598187392 | 1.26427E-26 | actin related protein 2/3 complex subunit 3                        |
| SMIM1      | 2.3976E-120 | -0.600854545 | 6.2856E-116 | small integral membrane protein 1 (Vel blood group)                |
| TMEM256    | 4.34404E-19 | -0.601144556 | 1.13883E-14 | transmembrane protein 256                                          |
| CARD19     | 1.11751E-25 | -0.601458512 | 2.92967E-21 | caspase recruitment domain family member 19                        |
| CRACR2B    | 4.52712E-93 | -0.6018158   | 1.18683E-88 | calcium release activated channel regulator 2B                     |
| TIMM8B     | 6.2645E-18  | -0.603574588 | 1.6423E-13  | translocase of inner mitochondrial membrane 8 homolog B            |
| AC009041.2 | 1.109E-120  | -0.60401594  | 2.9073E-116 |                                                                    |
| CIRBP      | 1.37273E-54 | -0.604184434 | 3.59875E-50 | cold inducible RNA binding protein                                 |
| ELF5       | 4.1387E-129 | -0.606000762 | 1.085E-124  | E74 like ETS transcription factor 5                                |
| METRN      | 3.07696E-58 | -0.60610667  | 8.06656E-54 | meteorin, glial cell differentiation regulator                     |
| PSMD8      | 1.07598E-19 | -0.608374558 | 2.82078E-15 | proteasome 26S subunit, non-ATPase 8                               |
| BEX4       | 3.74841E-36 | -0.608753083 | 9.82684E-32 | brain expressed X-linked 4                                         |
| RNF152     | 4.23904E-27 | -0.609029163 | 1.11131E-22 | ring finger protein 152                                            |
| LINC01554  | 2.702E-118  | -0.609717237 | 7.0835E-114 | long intergenic non-protein coding RNA 1554                        |
| HIBADH     | 1.37917E-50 | -0.611775582 | 3.61564E-46 | 3-hydroxyisobutyrate dehydrogenase                                 |
| GTF3A      | 5.66715E-16 | -0.615599198 | 1.4857E-11  | general transcription factor IIIA                                  |
| TMEM219    | 3.11126E-20 | -0.616919365 | 8.15647E-16 | transmembrane protein 219                                          |
| TOMM20     | 6.81991E-41 | -0.618213384 | 1.78791E-36 | translocase of outer mitochondrial membrane 20                     |
| STK32A     | 8.1439E-124 | -0.619500633 | 2.135E-119  | serine/threonine kinase 32A                                        |
| ACP1       | 2.38429E-19 | -0.619888647 | 6.25066E-15 | acid phosphatase 1                                                 |
| SNCA       | 9.03493E-24 | -0.624528779 | 2.3686E-19  | synuclein alpha                                                    |
| CENPX      | 8.09649E-22 | -0.627330352 | 2.12258E-17 | centromere protein X                                               |
| LSM4       | 8.85418E-23 | -0.631846634 | 2.32121E-18 | LSM4 homolog, U6 small nuclear RNA and mRNA degradation associated |
| CKB        | 8.40935E-22 | -0.633195727 | 2.2046E-17  | creatine kinase B                                                  |
| TSPO       | 1.96453E-74 | -0.6333172   | 5.15021E-70 | translocator protein                                               |
| MRPL34     | 8.55977E-18 | -0.634208857 | 2.24403E-13 | mitochondrial ribosomal protein L34                                |
| GRHRP      | 1.85948E-18 | -0.634376598 | 4.87483E-14 | glyoxylate and hydroxypyruvate reductase                           |
| ANAPC11    | 1.95781E-21 | -0.634941782 | 5.1326E-17  | anaphase promoting complex subunit 11                              |
| GCSH       | 2.49767E-37 | -0.635635282 | 6.54788E-33 | glycine cleavage system protein H                                  |
| SDHB       | 2.72777E-28 | -0.636575405 | 7.15113E-24 | succinate dehydrogenase complex iron sulfur subunit B              |
| NOSTRIN    | 1.4954E-101 | -0.638546853 | 3.92046E-97 | nitric oxide synthase trafficking                                  |
| ECI2       | 4.46973E-42 | -0.638949599 | 1.17178E-37 | enoyl-CoA delta isomerase 2                                        |
| AP2S1      | 9.60926E-25 | -0.639868473 | 2.51916E-20 | adaptor related protein complex 2 subunit sigma 1                  |
| TMEM230    | 1.02992E-29 | -0.640938268 | 2.70005E-25 | transmembrane protein 230                                          |
| GLO1       | 7.81815E-20 | -0.641092842 | 2.04961E-15 | glyoxalase I                                                       |
| GNF5       | 5.17439E-39 | -0.64218245  | 1.35652E-34 | G protein subunit gamma 5                                          |
| SPTSSA     | 1.34485E-16 | -0.643239696 | 3.52566E-12 | serine palmitoyltransferase small subunit A                        |
| COMT       | 3.8622E-26  | -0.643487102 | 1.01251E-21 | catechol-O-methyltransferase                                       |
| MSRB2      | 8.54577E-46 | -0.64401172  | 2.24036E-41 | methionine sulfoxide reductase B2                                  |
| NDUFS2     | 4.89774E-21 | -0.645328789 | 1.28399E-16 | NADH:ubiquinone oxidoreductase core subunit S2                     |
| SH3YL1     | 3.13231E-19 | -0.646459659 | 8.21167E-15 | SH3 and SYLF domain containing 1                                   |
| ZFYVE21    | 9.739E-22   | -0.646503557 | 2.55318E-17 | zinc finger FYVE-type containing 21                                |
| CYCS       | 1.24642E-38 | -0.646653589 | 3.26762E-34 | cytochrome c, somatic                                              |
| SELENBP1   | 2.61558E-75 | -0.646732687 | 6.85701E-71 | selenium binding protein 1                                         |
| GPR12      | 7.3352E-116 | -0.646991741 | 1.923E-111  | G protein-coupled receptor 12                                      |
| DYNLRB1    | 2.66478E-18 | -0.6477442   | 6.98599E-14 | dynein light chain roadblock-type 1                                |
| CHMP2A     | 5.21983E-26 | -0.651046201 | 1.36843E-21 | charged multivesicular body protein 2A                             |
| CLTA       | 1.77972E-34 | -0.651291033 | 4.66571E-30 | clathrin light chain A                                             |
| MRPL52     | 5.79901E-20 | -0.652163805 | 1.52027E-15 | mitochondrial ribosomal protein L52                                |
| NDUFV1     | 1.63717E-24 | -0.652942989 | 4.292E-20   | NADH:ubiquinone oxidoreductase core subunit V1                     |

Table S5

|            |             |              |             |                                                             |
|------------|-------------|--------------|-------------|-------------------------------------------------------------|
| OLIG1      | 2.6061E-127 | -0.654565391 | 6.8323E-123 | oligodendrocyte transcription factor 1                      |
| RPS19BP1   | 6.02936E-22 | -0.654925762 | 1.58066E-17 | ribosomal protein S19 binding protein 1                     |
| NDUFC2     | 3.80795E-28 | -0.655474905 | 9.98293E-24 | NADH:ubiquinone oxidoreductase subunit C2                   |
| OSBPL1A    | 1.55422E-23 | -0.655502903 | 4.07453E-19 | oxysterol binding protein like 1A                           |
| SRSF9      | 1.38474E-27 | -0.657713426 | 3.63024E-23 | serine and arginine rich splicing factor 9                  |
| TXN2       | 1.71049E-22 | -0.658229114 | 4.48421E-18 | thioredoxin 2                                               |
| NUDT8      | 1.05968E-32 | -0.662914475 | 2.77805E-28 | nudix hydrolase 8                                           |
| S100A11    | 6.5028E-91  | -0.663272402 | 1.70477E-86 | S100 calcium binding protein A11                            |
| SNU13      | 2.43272E-35 | -0.663370233 | 6.37761E-31 | small nuclear ribonucleoprotein 13                          |
| TRIM2      | 2.0021E-114 | -0.663464799 | 5.2488E-110 | tripartite motif containing 2                               |
| SMS        | 2.65223E-32 | -0.666906263 | 6.95309E-28 | spermine synthase                                           |
| ROPN1      | 2.8151E-133 | -0.667666297 | 7.38E-129   | rhopilin associated tail protein 1                          |
| APOO       | 9.79132E-74 | -0.675861051 | 2.56689E-69 | apolipoprotein O                                            |
| ALKBH7     | 1.44609E-25 | -0.677485073 | 3.79106E-21 | alkB homolog 7                                              |
| MRPL51     | 3.79065E-25 | -0.678771847 | 9.93757E-21 | mitochondrial ribosomal protein L51                         |
| UBE2M      | 8.0281E-25  | -0.679945699 | 2.10465E-20 | ubiquitin conjugating enzyme E2 M                           |
| GLRX       | 1.19998E-51 | -0.687742639 | 3.14586E-47 | glutaredoxin                                                |
| GNG7       | 9.7914E-107 | -0.696533174 | 2.5669E-102 | G protein subunit gamma 7                                   |
| LMO7-AS1   | 4.6159E-108 | -0.698321822 | 1.2101E-103 | LMO7 antisense RNA 1                                        |
| CD59       | 3.09883E-08 | -0.699777639 | 0.00081239  | CD59 molecule (CD59 blood group)                            |
| MRPL20     | 1.32406E-29 | -0.700620788 | 3.47114E-25 | mitochondrial ribosomal protein L20                         |
| ATP6V0E2   | 1.5329E-91  | -0.702772167 | 4.01865E-87 | ATPase H+ transporting V0 subunit e2                        |
| DECR1      | 1.1098E-26  | -0.703956432 | 2.90944E-22 | 2,4-dienoyl-CoA reductase 1                                 |
| PRELID1    | 3.93426E-31 | -0.709993753 | 1.0314E-26  | PREL1 domain containing 1                                   |
| TM4SF1     | 7.30141E-15 | -0.713133919 | 1.91414E-10 | transmembrane 4 L six family member 1                       |
| COX6A1     | 2.31809E-59 | -0.713887159 | 6.0771E-55  | cytochrome c oxidase subunit 6A1                            |
| NDUFA12    | 5.95192E-28 | -0.714525499 | 1.56036E-23 | NADH:ubiquinone oxidoreductase subunit A12                  |
| PFDN5      | 1.8285E-124 | -0.715736479 | 4.7937E-120 | prefoldin subunit 5                                         |
| DDT        | 1.70233E-36 | -0.719653085 | 4.46283E-32 | D-dopachrome tautomerase                                    |
| NDUFB5     | 6.23797E-27 | -0.722430057 | 1.63535E-22 | NADH:ubiquinone oxidoreductase subunit B5                   |
| UQCRC2     | 2.72799E-29 | -0.723678463 | 7.15169E-25 | ubiquinol-cytochrome c reductase core protein 2             |
| PSMB6      | 1.65354E-28 | -0.724993846 | 4.33493E-24 | proteasome 20S subunit beta 6                               |
| HIF1A      | 5.53828E-32 | -0.725825991 | 1.45192E-27 | hypoxia inducible factor 1 subunit alpha                    |
| SNRPN      | 1.42698E-48 | -0.726111014 | 3.74096E-44 | small nuclear ribonucleoprotein polypeptide N               |
| LRRC26     | 2.1962E-160 | -0.733352165 | 5.7576E-156 | leucine rich repeat containing 26                           |
| PPIA       | 9.7018E-143 | -0.734061195 | 2.5434E-138 | peptidylprolyl isomerase A                                  |
| LITAF      | 4.50408E-27 | -0.735215455 | 1.18079E-22 | lipopolysaccharide induced TNF factor                       |
| FRZB       | 3.4798E-108 | -0.735880672 | 9.1226E-104 | frizzled related protein                                    |
| COPE       | 3.49095E-37 | -0.736902292 | 9.15188E-33 | COPI coat complex subunit epsilon                           |
| C1orf122   | 1.86961E-39 | -0.737960988 | 4.90138E-35 | chromosome 1 open reading frame 122                         |
| TMEM141    | 3.53083E-36 | -0.739818988 | 9.25643E-32 | transmembrane protein 141                                   |
| ATP6V1F    | 2.27899E-32 | -0.743670866 | 5.97461E-28 | ATPase H+ transporting V1 subunit F                         |
| SDHD       | 3.1518E-32  | -0.745680023 | 8.26276E-28 | succinate dehydrogenase complex subunit D                   |
| PKM        | 7.19048E-43 | -0.746579819 | 1.88506E-38 | pyruvate kinase M1/2                                        |
| PART1      | 9.59311E-69 | -0.747924471 | 2.51493E-64 | prostate androgen-regulated transcript 1                    |
| RWD4       | 2.80049E-43 | -0.751076524 | 7.34177E-39 | RWD domain containing 4                                     |
| VTI1B      | 1.02526E-37 | -0.751409761 | 2.68783E-33 | vesicle transport through interaction with t-SNAREs 1B      |
| IDH2       | 1.21884E-47 | -0.753593984 | 3.19531E-43 | isocitrate dehydrogenase (NADP(+)) 2                        |
| ALDH9A1    | 9.69457E-42 | -0.75487663  | 2.54153E-37 | aldehyde dehydrogenase 9 family member A1                   |
| LMO4       | 2.18297E-45 | -0.756129398 | 5.72287E-41 | LIM domain only 4                                           |
| TOMM7      | 1.7082E-123 | -0.756754643 | 4.4782E-119 | translocase of outer mitochondrial membrane 7               |
| SURF1      | 1.8835E-42  | -0.760478322 | 4.93778E-38 | SURF1 cytochrome c oxidase assembly factor                  |
| FMNL1      | 2.26021E-79 | -0.762630314 | 5.92538E-75 | formin like 1                                               |
| NDUFS3     | 6.36314E-30 | -0.763016229 | 1.66816E-25 | NADH:ubiquinone oxidoreductase core subunit S3              |
| PGK1       | 5.17864E-37 | -0.765986515 | 1.35763E-32 | phosphoglycerate kinase 1                                   |
| HSPE1      | 6.5236E-68  | -0.768314318 | 1.71023E-63 | heat shock protein family E (Hsp10) member 1                |
| NDUFS4     | 1.42233E-35 | -0.773968463 | 3.72879E-31 | NADH:ubiquinone oxidoreductase subunit S4                   |
| ELF3       | 8.81951E-54 | -0.774910421 | 2.31212E-49 | E74 like ETS transcription factor 3                         |
| PPP1CB     | 5.54322E-57 | -0.777068672 | 1.45321E-52 | protein phosphatase 1 catalytic subunit beta                |
| BRK1       | 5.61113E-36 | -0.777382367 | 1.47101E-31 | BRICK1 subunit of SCAR/WAVE actin nucleating complex        |
| ACO25154.2 | 1.7167E-170 | -0.778426608 | 4.5006E-166 |                                                             |
| NDUFA5     | 9.60466E-38 | -0.778484648 | 2.51796E-33 | NADH:ubiquinone oxidoreductase subunit A5                   |
| SRP14      | 1.3285E-115 | -0.780818269 | 3.4828E-111 | signal recognition particle 14                              |
| EID1       | 1.08125E-58 | -0.781597949 | 2.8346E-54  | EP300 interacting inhibitor of differentiation 1            |
| CHPT1      | 3.39272E-60 | -0.782202502 | 8.89437E-56 | choline phosphotransferase 1                                |
| GHITM      | 1.3624E-30  | -0.783702902 | 3.57167E-26 | growth hormone inducible transmembrane protein              |
| SCOC       | 2.03107E-38 | -0.784766702 | 5.32464E-34 | short coiled-coil protein                                   |
| FMO5       | 6.5977E-135 | -0.789918648 | 1.7297E-130 | flavin containing dimethylaniline monooxygenase 5           |
| CD24       | 3.90211E-77 | -0.792444209 | 1.02298E-72 | CD24 molecule                                               |
| ARL6IP4    | 5.18432E-52 | -0.793745543 | 1.35912E-47 | ADP ribosylation factor like GTPase 6 interacting protein 4 |
| CMPK1      | 6.76022E-35 | -0.794206356 | 1.77226E-30 | cytidine/uridine monophosphate kinase 1                     |
| EN1        | 1.41004E-98 | -0.80318139  | 3.69657E-94 | engrailed homeobox 1                                        |
| HMGN3      | 7.69921E-43 | -0.805145841 | 2.01842E-38 | high mobility group nucleosomal binding domain 3            |
| SAT1       | 2.31321E-28 | -0.805354823 | 6.0643E-24  | spermidine/spermine N1-acetyltransferase 1                  |
| PADI2      | 3.9621E-180 | -0.805703677 | 1.0387E-175 | peptidyl arginine deiminase 2                               |
| C2orf88    | 1.9378E-143 | -0.806489314 | 5.0801E-139 | chromosome 2 open reading frame 88                          |

Table S5

|            |             |              |             |                                                                     |
|------------|-------------|--------------|-------------|---------------------------------------------------------------------|
| COX14      | 2.0858E-45  | -0.810144766 | 5.46813E-41 | cytochrome c oxidase assembly factor COX14                          |
| VDAC2      | 1.49537E-65 | -0.81044598  | 3.92025E-61 | voltage dependent anion channel 2                                   |
| FBXO2      | 1.11476E-64 | -0.810896765 | 2.92246E-60 | F-box protein 2                                                     |
| ZNF428     | 2.15923E-69 | -0.811119297 | 5.66063E-65 | zinc finger protein 428                                             |
| PHLDA1     | 4.63252E-69 | -0.817603224 | 1.21446E-64 | pleckstrin homology like domain family A member 1                   |
| NANS       | 1.15747E-55 | -0.820443323 | 3.03442E-51 | N-acetylneuraminase                                                 |
| MRAS       | 5.9333E-142 | -0.828243743 | 1.5555E-137 | muscle RAS oncogene homolog                                         |
| DSTN       | 2.6166E-151 | -0.83214433  | 6.8598E-147 | destrin, actin depolymerizing factor                                |
| NDUFA8     | 5.68848E-49 | -0.832306092 | 1.49129E-44 | NADH:ubiquinone oxidoreductase subunit A8                           |
| AURKAIP1   | 1.27776E-52 | -0.833646713 | 3.34977E-48 | aurora kinase A interacting protein 1                               |
| HSBP1      | 9.2444E-49  | -0.836098582 | 2.42351E-44 | heat shock factor binding protein 1                                 |
| S100A13    | 1.86806E-60 | -0.841332607 | 4.89731E-56 | S100 calcium binding protein A13                                    |
| FKBP8      | 1.47434E-50 | -0.842232544 | 3.86512E-46 | FKBP prolyl isomerase 8                                             |
| ESRRA      | 3.31426E-60 | -0.848895468 | 8.68867E-56 | estrogen related receptor alpha                                     |
| ERH        | 1.69399E-62 | -0.848921773 | 4.44097E-58 | ERH mRNA splicing and mitosis factor                                |
| BNIP3      | 2.14168E-72 | -0.849440516 | 5.61463E-68 | BCL2 interacting protein 3                                          |
| C19orf70   | 3.10574E-51 | -0.851700019 | 8.14201E-47 | mitochondrial contact site and cristae organizing system subunit 13 |
| MRPL33     | 1.28557E-56 | -0.855687303 | 3.37026E-52 | mitochondrial ribosomal protein L33                                 |
| PYURF      | 7.22088E-44 | -0.859366478 | 1.89303E-39 | PIGY upstream reading frame                                         |
| SRP9       | 3.69793E-66 | -0.860129385 | 9.69449E-62 | signal recognition particle 9                                       |
| FKBP4      | 1.68942E-31 | -0.861487086 | 4.42899E-27 | FKBP prolyl isomerase 4                                             |
| GLRX5      | 8.66291E-47 | -0.862171981 | 2.27107E-42 | glutaredoxin 5                                                      |
| MPC2       | 2.95844E-52 | -0.86993268  | 7.75585E-48 | mitochondrial pyruvate carrier 2                                    |
| HPRT1      | 7.98603E-79 | -0.872544521 | 2.09362E-74 | hypoxanthine phosphoribosyltransferase 1                            |
| LGALS1     | 1.33092E-75 | -0.876034035 | 3.48914E-71 | galectin 1                                                          |
| MCPIP2     | 8.0134E-134 | -0.876794199 | 2.1008E-129 | MAPK regulated corepressor interacting protein 2                    |
| NDUFA13    | 2.75315E-63 | -0.879172168 | 7.21767E-59 | NADH:ubiquinone oxidoreductase subunit A13                          |
| SPTSSB     | 1.772E-109  | -0.879906054 | 4.6454E-105 | serine palmitoyltransferase small subunit B                         |
| ANAPC16    | 2.0205E-58  | -0.883666775 | 5.29694E-54 | anaphase promoting complex subunit 16                               |
| NDUFA2     | 2.90889E-63 | -0.885248217 | 7.62596E-59 | NADH:ubiquinone oxidoreductase subunit A2                           |
| CYC1       | 3.58234E-53 | -0.886154584 | 9.39145E-49 | cytochrome c1                                                       |
| MPC1       | 1.71659E-52 | -0.886777103 | 4.5002E-48  | mitochondrial pyruvate carrier 1                                    |
| NIPSNAP2   | 1.55341E-65 | -0.888196595 | 4.07241E-61 | nipsnap homolog 2                                                   |
| MDH2       | 4.7937E-61  | -0.890059914 | 1.25672E-56 | malate dehydrogenase 2                                              |
| REXO2      | 1.256E-44   | -0.896828646 | 3.29274E-40 | RNA exonuclease 2                                                   |
| SKP1       | 6.4903E-124 | -0.898039186 | 1.7015E-119 | S-phase kinase associated protein 1                                 |
| PNKD       | 2.55921E-59 | -0.900575908 | 6.70922E-55 | PNKD metallo-beta-lactamase domain containing                       |
| POLR2L     | 1.2749E-102 | -0.904110339 | 3.3422E-98  | RNA polymerase II subunit L                                         |
| BEX3       | 8.80138E-66 | -0.904309979 | 2.30737E-61 | brain expressed X-linked 3                                          |
| NDUFA11    | 1.97196E-70 | -0.904402547 | 5.1697E-66  | NADH:ubiquinone oxidoreductase subunit A11                          |
| CCNI       | 1.12872E-94 | -0.910887587 | 2.95906E-90 | cyclin I                                                            |
| MRPL41     | 2.28285E-75 | -0.913644614 | 5.98472E-71 | mitochondrial ribosomal protein L41                                 |
| ATP6V1G1   | 6.51721E-89 | -0.914804908 | 1.70855E-84 | ATPase H+ transporting V1 subunit G1                                |
| UBL5       | 2.2193E-118 | -0.916940182 | 5.8181E-114 | ubiquitin like 5                                                    |
| DYNLT1     | 1.88382E-57 | -0.918571821 | 4.93861E-53 | dynein light chain Tctex-type 1                                     |
| TPH1       | 5.3181E-91  | -0.927281376 | 1.39419E-86 | triosephosphate isomerase 1                                         |
| HINT2      | 9.66065E-83 | -0.934164722 | 2.53264E-78 | histidine triad nucleotide binding protein 2                        |
| STK39      | 1.7669E-147 | -0.941326358 | 4.6322E-143 | serine/threonine kinase 39                                          |
| SH3BGR2    | 1.1716E-163 | -0.943878941 | 3.0714E-159 | SH3 domain binding glutamate rich protein like 2                    |
| SMIM22     | 1.929E-209  | -0.946790541 | 5.0571E-205 | small integral membrane protein 22                                  |
| AC011247.1 | 1.9224E-176 | -0.950011036 | 5.0399E-172 |                                                                     |
| NDUFS6     | 3.86852E-82 | -0.953874637 | 1.01417E-77 | NADH:ubiquinone oxidoreductase subunit S6                           |
| VAMP8      | 3.24203E-85 | -0.96126804  | 8.49931E-81 | vesicle associated membrane protein 8                               |
| ATP1B1     | 8.97603E-29 | -0.968712245 | 2.35316E-24 | ATPase Na+/K+ transporting subunit beta 1                           |
| HOMER2     | 2.6302E-166 | -0.97375259  | 6.8954E-162 | homer scaffold protein 2                                            |
| PRDX2      | 2.61655E-98 | -0.974371255 | 6.85954E-94 | peroxiredoxin 2                                                     |
| EIF3K      | 6.6325E-140 | -0.976893381 | 1.7388E-135 | eukaryotic translation initiation factor 3 subunit K                |
| NDUFS7     | 2.70662E-69 | -0.979938391 | 7.09568E-65 | NADH:ubiquinone oxidoreductase core subunit S7                      |
| GNAS       | 1.8969E-149 | -0.981651185 | 4.973E-145  | GNAS complex locus                                                  |
| GABARAPL2  | 3.29702E-95 | -0.981869701 | 8.64348E-91 | GABA type A receptor associated protein like 2                      |
| CNN3       | 7.8918E-108 | -0.988145126 | 2.0689E-103 | calponin 3                                                          |
| MTCH1      | 2.18152E-69 | -0.989112402 | 5.71907E-65 | mitochondrial carrier 1                                             |
| COX4I1     | 7.1549E-175 | -0.989888146 | 1.8757E-170 | cytochrome c oxidase subunit 4I1                                    |
| MDH1       | 9.08632E-64 | -0.989983678 | 2.38207E-59 | malate dehydrogenase 1                                              |
| AES        | 2.46583E-88 | -0.990292164 | 6.46441E-84 | TLE family member 5, transcriptional modulator                      |
| NDUFAF3    | 1.51055E-91 | -0.994430297 | 3.96005E-87 | NADH:ubiquinone oxidoreductase complex assembly factor 3            |
| ATP5MC2    | 6.0438E-182 | -0.999644266 | 1.5845E-177 | ATP synthase membrane subunit c locus 2                             |
| PARK7      | 2.49345E-90 | -1.002364636 | 6.53684E-86 | Parkinsonism associated deglycase                                   |
| PRDX3      | 2.64375E-89 | -1.002381381 | 6.93085E-85 | peroxiredoxin 3                                                     |
| ATP5MC1    | 1.3969E-102 | -1.005859912 | 3.66214E-98 | ATP synthase membrane subunit c locus 1                             |
| HIGD1A     | 1.21259E-88 | -1.009324334 | 3.17893E-84 | HIG1 hypoxia inducible domain family member 1A                      |
| MGST3      | 6.656E-107  | -1.015363866 | 1.7449E-102 | microsomal glutathione S-transferase 3                              |
| NDUFV2     | 2.2012E-99  | -1.016567468 | 5.77079E-95 | NADH:ubiquinone oxidoreductase core subunit V2                      |
| SMDT1      | 2.49862E-86 | -1.025166615 | 6.45037E-82 | single-pass membrane protein with aspartate rich tail 1             |
| PDK3       | 8.0274E-174 | -1.029124763 | 2.1045E-169 | pyruvate dehydrogenase kinase 3                                     |
| NDUFB4     | 8.3048E-123 | -1.032922461 | 2.1772E-118 | NADH:ubiquinone oxidoreductase subunit B4                           |

Table S5

|            |             |              |             |                                                                                 |
|------------|-------------|--------------|-------------|---------------------------------------------------------------------------------|
| SUCLG1     | 1.89068E-85 | -1.037535374 | 4.95659E-81 | succinate-CoA ligase GDP/ADP-forming subunit alpha                              |
| UQCRFS1    | 1.43506E-88 | -1.039690387 | 3.76216E-84 | ubiquinol-cytochrome c reductase, Rieske iron-sulfur polypeptide 1              |
| SLIRP      | 1.7332E-88  | -1.04504283  | 4.54375E-84 | SRA stem-loop interacting RNA binding protein                                   |
| AC007906.2 | 1.7878E-121 | -1.047174704 | 4.6869E-117 |                                                                                 |
| ATP5PD     | 8.1099E-118 | -1.049130998 | 2.1261E-113 | ATP synthase peripheral stalk subunit d                                         |
| SPINT1-AS1 | 1.61707E-94 | -1.050845792 | 4.23931E-90 | SPINT1 antisense RNA 1                                                          |
| ACTR3B     | 1.6178E-179 | -1.052370797 | 4.2412E-175 | actin related protein 3B                                                        |
| RPS27L     | 3.28655E-94 | -1.052919543 | 8.61601E-90 | ribosomal protein S27 like                                                      |
| HDDC2      | 4.8874E-99  | -1.054204792 | 1.28128E-94 | HD domain containing 2                                                          |
| NDUFB10    | 2.03823E-91 | -1.056509844 | 5.34343E-87 | NADH:ubiquinone oxidoreductase subunit B10                                      |
| NDUFB9     | 8.78791E-88 | -1.062303393 | 2.30384E-83 | NADH:ubiquinone oxidoreductase subunit B9                                       |
| ID4        | 6.70328E-71 | -1.064363714 | 1.75733E-66 | inhibitor of DNA binding 4, HLH protein                                         |
| ECHS1      | 8.96856E-87 | -1.066074102 | 2.3512E-82  | enoyl-CoA hydratase, short chain 1                                              |
| ATP5ME     | 2.9114E-131 | -1.073951371 | 7.6326E-127 | ATP synthase membrane subunit e                                                 |
| ATP5F1A    | 6.1306E-110 | -1.076045386 | 1.6072E-105 | ATP synthase F1 subunit alpha                                                   |
| ATP5MF     | 7.5248E-129 | -1.087506145 | 1.9727E-124 | ATP synthase membrane subunit f                                                 |
| TSTD1      | 7.09906E-94 | -1.090969657 | 1.86109E-89 | thiosulfate sulfurtransferase like domain containing 1                          |
| PDHA1      | 4.5597E-100 | -1.090983097 | 1.19537E-95 | pyruvate dehydrogenase E1 subunit alpha 1                                       |
| MINOS1     | 1.8504E-108 | -1.093924294 | 4.851E-104  | mitochondrial contact site and cristae organizing system subunit 10             |
| MIEN1      | 4.87897E-95 | -1.095473284 | 1.27907E-90 | migration and invasion enhancer 1                                               |
| NDUFS8     | 2.40038E-90 | -1.102362831 | 6.29285E-86 | NADH:ubiquinone oxidoreductase core subunit S8                                  |
| ATP5PO     | 2.2117E-106 | -1.10265651  | 5.7982E-102 | ATP synthase peripheral stalk subunit OSCP                                      |
| VDAC1      | 9.5754E-106 | -1.102980631 | 2.5103E-101 | voltage dependent anion channel 1                                               |
| ATP5F1D    | 2.2941E-152 | -1.106670538 | 6.0143E-148 | ATP synthase F1 subunit delta                                                   |
| BOLA3      | 2.8777E-119 | -1.111571163 | 7.5441E-115 | bolA family member 3                                                            |
| COX17      | 2.95941E-89 | -1.114776245 | 7.75839E-85 | cytochrome c oxidase copper chaperone COX17                                     |
| NDUFB8     | 2.9857E-108 | -1.119887575 | 7.8274E-104 | NADH:ubiquinone oxidoreductase subunit B8                                       |
| ATP5PF     | 1.0379E-148 | -1.12475192  | 2.7209E-144 | ATP synthase peripheral stalk subunit F6                                        |
| SERF2      | 9.2408E-248 | -1.12744852  | 2.4226E-243 | small EDRK-rich factor 2                                                        |
| PRDX5      | 4.1685E-126 | -1.13390291  | 1.0928E-121 | peroxiredoxin 5                                                                 |
| NDUFB2     | 6.4067E-132 | -1.137522309 | 1.6796E-127 | NADH:ubiquinone oxidoreductase subunit B2                                       |
| CHCHD2     | 2.0651E-202 | -1.138516818 | 5.4138E-198 | coiled-coil-helix-coiled-coil-helix domain containing 2                         |
| CITED4     | 2.08678E-86 | -1.148355756 | 5.4707E-82  | Cbp/p300 interacting transactivator with Glu/Asp rich carboxy-terminal domain 4 |
| PPA1       | 6.6452E-123 | -1.155893269 | 1.7421E-118 | inorganic pyrophosphatase 1                                                     |
| HINT1      | 1.047E-230  | -1.1606951   | 2.7449E-226 | histidine triad nucleotide binding protein 1                                    |
| ENO1       | 4.6391E-149 | -1.162155104 | 1.2162E-144 | enolase 1                                                                       |
| EC11       | 2.2066E-128 | -1.163674302 | 5.7847E-124 | enoyl-CoA delta isomerase 1                                                     |
| NDUFAB1    | 1.4418E-131 | -1.173228626 | 3.7799E-127 | NADH:ubiquinone oxidoreductase subunit AB1                                      |
| ATP5F1E    | 1.0627E-269 | -1.175629061 | 2.786E-265  | ATP synthase F1 subunit epsilon                                                 |
| NDUFA3     | 8.3707E-114 | -1.17942351  | 2.1945E-109 | NADH:ubiquinone oxidoreductase subunit A3                                       |
| ADI1       | 1.9569E-102 | -1.1809509   | 5.13027E-98 | acireductone dioxygenase 1                                                      |
| COX6B1     | 1.161E-180  | -1.183205643 | 3.0436E-176 | cytochrome c oxidase subunit 6B1                                                |
| ADIRF      | 1.1476E-158 | -1.189475371 | 3.0085E-154 | adipogenesis regulatory factor                                                  |
| UQCR10     | 5.589E-153  | -1.199361463 | 1.4652E-148 | ubiquinol-cytochrome c reductase, complex III subunit X                         |
| NDUFA6     | 1.2745E-119 | -1.203747185 | 3.3413E-115 | NADH:ubiquinone oxidoreductase subunit A6                                       |
| SLC25A5    | 2.6257E-184 | -1.208046447 | 6.8836E-180 | solute carrier family 25 member 5                                               |
| RCAN2      | 3.2649E-206 | -1.215836052 | 8.5593E-202 | regulator of calcineurin 2                                                      |
| ISCU       | 4.7767E-122 | -1.216479626 | 1.2523E-117 | iron-sulfur cluster assembly enzyme                                             |
| COX5A      | 6.108E-124  | -1.218311145 | 1.6013E-119 | cytochrome c oxidase subunit 5A                                                 |
| ROMO1      | 4.3424E-124 | -1.218747302 | 1.1384E-119 | reactive oxygen species modulator 1                                             |
| UQCQR      | 7.8448E-167 | -1.220317794 | 2.0566E-162 | ubiquinol-cytochrome c reductase complex III subunit VII                        |
| GOT1       | 2.1704E-150 | -1.225659071 | 5.6898E-146 | glutamic-oxaloacetic transaminase 1                                             |
| NDUFS5     | 3.0211E-182 | -1.225712901 | 7.9202E-178 | NADH:ubiquinone oxidoreductase subunit S5                                       |
| SLC25A3    | 1.4895E-192 | -1.230244238 | 3.9049E-188 | solute carrier family 25 member 3                                               |
| ETHE1      | 4.0594E-161 | -1.233318762 | 1.0642E-156 | ETHE1 persulfide dioxygenase                                                    |
| ATP5MPL    | 5.2318E-146 | -1.236850366 | 1.3716E-141 | ATP synthase membrane subunit 6.8PL                                             |
| CYSTM1     | 3.3768E-166 | -1.239810276 | 8.8526E-162 | cysteine rich transmembrane module containing 1                                 |
| NDUFB7     | 8.5603E-143 | -1.241209224 | 2.2442E-138 | NADH:ubiquinone oxidoreductase subunit B7                                       |
| QDPR       | 4.9814E-180 | -1.247188389 | 1.3059E-175 | quinoid dihydropteridine reductase                                              |
| COX6C      | 5.4349E-227 | -1.25973951  | 1.4248E-222 | cytochrome c oxidase subunit 6C                                                 |
| CALM2      | 2.7698E-236 | -1.265650854 | 7.2613E-232 | calmodulin 1                                                                    |
| ATP5MD     | 9.7181E-171 | -1.280521488 | 2.5477E-166 | ATP synthase membrane subunit DAPIT                                             |
| PPDPF      | 2.4988E-239 | -1.291438953 | 6.551E-235  | pancreatic progenitor cell differentiation and proliferation factor             |
| UQCRR      | 8.4568E-227 | -1.295493771 | 2.217E-222  | ubiquinol-cytochrome c reductase binding protein                                |
| UQCRRH     | 1.6146E-208 | -1.295713813 | 4.2327E-204 | ubiquinol-cytochrome c reductase hinge protein                                  |
| NDUFB3     | 5.5643E-149 | -1.301156855 | 1.4587E-144 | NADH:ubiquinone oxidoreductase subunit B3                                       |
| COX7A2     | 2.0939E-223 | -1.305094013 | 5.4894E-219 | cytochrome c oxidase subunit 7A2                                                |
| NDUFC1     | 4.7751E-165 | -1.306540766 | 1.2518E-160 | NADH:ubiquinone oxidoreductase subunit C1                                       |
| SLC25A4    | 3.6194E-203 | -1.313733108 | 9.4887E-199 | solute carrier family 25 member 4                                               |
| GCHFR      | 1.6968E-172 | -1.319644016 | 4.4483E-168 | GTP cyclohydrolase I feedback regulator                                         |
| PHB        | 8.6443E-142 | -1.32661012  | 2.2662E-137 | prohibitin                                                                      |
| GPX4       | 7.4293E-206 | -1.337824729 | 1.9477E-201 | glutathione peroxidase 4                                                        |
| AZGP1      | 2.9816E-96  | -1.380060372 | 7.81656E-92 | alpha-2-glycoprotein 1, zinc-binding                                            |
| CA6        | 5.209E-267  | -1.389233173 | 1.3656E-262 | carbonic anhydrase 6                                                            |
| CLDN10     | 3.7382E-202 | -1.394512531 | 9.8001E-198 | claudin 10                                                                      |
| COX8A      | 2.3707E-230 | -1.401617524 | 6.215E-226  | cytochrome c oxidase subunit 8A                                                 |



Table S5

|         |             |              |             |                                                                              |
|---------|-------------|--------------|-------------|------------------------------------------------------------------------------|
| NDUFB1  | 2.8889E-193 | -1.426116396 | 7.5734E-189 | NADH:ubiquinone oxidoreductase subunit B1                                    |
| COX7B   | 7.7619E-207 | -1.431887622 | 2.0349E-202 | cytochrome c oxidase subunit 7B                                              |
| UQCRR11 | 1.3342E-206 | -1.434101793 | 3.4978E-202 | ubiquinol-cytochrome c reductase, complex III subunit XI                     |
| ATP5F1B | 7.7939E-191 | -1.437848323 | 2.0432E-186 | ATP synthase F1 subunit beta                                                 |
| NDUFA1  | 3.0613E-226 | -1.45058793  | 8.0255E-222 | NADH:ubiquinone oxidoreductase subunit A1                                    |
| ROPN1B  | 0           | -1.488373444 | 0           | rhopilin associated tail protein 1B                                          |
| ATP5MG  | 1.0076E-266 | -1.491234192 | 2.6414E-262 | ATP synthase membrane subunit g                                              |
| DCXR    | 7.3058E-205 | -1.542512334 | 1.9153E-200 | dicarbonyl and L-xylulose reductase                                          |
| ZG16B   | 6.39113E-88 | -1.544997691 | 1.6755E-83  | zymogen granule protein 16B                                                  |
| ATP5F1C | 1.4634E-203 | -1.551908599 | 3.8363E-199 | ATP synthase F1 subunit gamma                                                |
| STAC2   | 0           | -1.556499529 | 0           | SH3 and cysteine rich domain 2                                               |
| SFRP1   | 9.3491E-139 | -1.55970355  | 2.451E-134  | secreted frizzled related protein 1                                          |
| COX5B   | 4.7112E-260 | -1.560049315 | 1.2351E-255 | cytochrome c oxidase subunit 5B                                              |
| PEBP1   | 2.5085E-257 | -1.586634018 | 6.5763E-253 | phosphatidylethanolamine binding protein 1                                   |
| LDHA    | 1.2246E-222 | -1.594946811 | 3.2105E-218 | lactate dehydrogenase A                                                      |
| PDCD4   | 4.1775E-210 | -1.596713942 | 1.0952E-205 | programmed cell death 4                                                      |
| ETFB    | 1.1861E-203 | -1.61847729  | 3.1096E-199 | electron transfer flavoprotein subunit beta                                  |
| NDUFA4  | 1.2078E-294 | -1.621379426 | 3.1663E-290 | NDUFA4 mitochondrial complex associated                                      |
| SLC12A2 | 6.68391E-46 | -1.631237211 | 1.75225E-41 | solute carrier family 12 member 2                                            |
| ELOB    | 1.6677E-284 | -1.63521184  | 4.3721E-280 | elongin B                                                                    |
| COX7C   | 2.3982E-292 | -1.658324089 | 6.2872E-288 | cytochrome c oxidase subunit 7C                                              |
| AKR1C1  | 2.1189E-216 | -1.677747212 | 5.5549E-212 | aldo-keto reductase family 1 member C2                                       |
| NDRG2   | 1.8917E-260 | -1.73628469  | 4.9593E-256 | NDRG family member 2                                                         |
| NCALD   | 0           | -1.754261678 | 0           | neurocalcin delta                                                            |
| TPD52L1 | 1.444E-304  | -1.803515831 | 3.7857E-300 | TPD52 like 1                                                                 |
| DBI     | 2.8706E-297 | -1.871212838 | 7.5256E-293 | diazepam binding inhibitor, acyl-CoA binding protein                         |
| ATP5MC3 | 1.3149E-292 | -1.903568668 | 3.4473E-288 | ATP synthase membrane subunit c locus 3                                      |
| CSRP1   | 0           | -1.944564098 | 0           | cysteine and glycine rich protein 1                                          |
| COX7A1  | 0           | -1.95084576  | 0           | cytochrome c oxidase subunit 7A1                                             |
| TESC    | 0           | -2.077593806 | 0           | tescalcin                                                                    |
| CHCHD10 | 0           | -2.103842131 | 0           | coiled-coil-helix-coiled-coil-helix domain containing 10                     |
| KRT8    | 0           | -2.149572927 | 0           | keratin 8                                                                    |
| GAPDH   | 3.4074E-281 | -2.226090632 | 8.9329E-277 | glyceraldehyde-3-phosphate dehydrogenase                                     |
| PPP1R1B | 0           | -2.288001771 | 0           | protein phosphatase 1 regulatory inhibitor subunit 1B                        |
| CAMK2N1 | 0           | -2.288524557 | 0           | calcium/calmodulin dependent protein kinase II inhibitor 1                   |
| S100A1  | 0           | -2.373223914 | 0           | S100 calcium binding protein A1                                              |
| KRT19   | 0           | -2.482586791 | 0           | keratin 19                                                                   |
| KRT18   | 0           | -2.486532004 | 0           | keratin 18                                                                   |
| KRT7    | 0           | -2.517890837 | 0           | keratin 7                                                                    |
| SNORC   | 0           | -2.539399458 | 0           | secondary ossification center associated regulator of chondrocyte maturation |
| SCGB1D2 | 3.16767E-44 | -2.819998113 | 8.30435E-40 | secretoglobin family 1D member 2                                             |
| AQP5    | 0           | -2.879641773 | 0           | aquaporin 5                                                                  |
| SCGB2A2 | 4.377E-71   | -3.38446038  | 1.14748E-66 | secretoglobin family 2A member 2                                             |
| MUCL1   | 2.01049E-74 | -3.402440739 | 5.2707E-70  | mucin like 1                                                                 |
| DCD     | 1.40087E-89 | -3.494107754 | 3.67253E-85 | dermcidin                                                                    |
| HBB     | 1.85086E-44 | -3.581896071 | 4.8522E-40  | hemoglobin subunit beta                                                      |

**Table S6: chronic WE vs unwounded skin comparison; + means upregulated in chronic WE**

| Gene      | p_val       | avg_logFC   | p_val_adj   | Description                                  |
|-----------|-------------|-------------|-------------|----------------------------------------------|
| S100A8    | 0           | 3.558167231 | 0           | S100 calcium binding protein A8              |
| S100A9    | 0           | 3.408363162 | 0           | S100 calcium binding protein A9              |
| KRT6B     | 0           | 3.361669662 | 0           | keratin 6B                                   |
| KRT6C     | 0           | 3.27519539  | 0           | keratin 6C                                   |
| KRT6A     | 0           | 3.227283044 | 0           | keratin 6A                                   |
| KRT16     | 0           | 3.217679454 | 0           | keratin 16                                   |
| S100A7    | 0           | 2.897074806 | 0           | S100 calcium binding protein A7              |
| KRT17     | 0           | 2.748031387 | 0           | keratin 17                                   |
| FABP5     | 1.0379E-272 | 2.426823834 | 2.7209E-268 | fatty acid binding protein 5                 |
| GJB2      | 0           | 2.280668999 | 0           | gap junction protein beta 2                  |
| DSC2      | 1.0042E-224 | 2.075991132 | 2.6325E-220 | desmocollin 2                                |
| CALML3    | 0           | 1.908194097 | 0           | calmodulin like 3                            |
| SPRR1B    | 2.3824E-180 | 1.828244604 | 6.2456E-176 | small proline rich protein 1B                |
| S100A2    | 3.2136E-153 | 1.80966861  | 8.4247E-149 | S100 calcium binding protein A2              |
| PI3       | 1.8405E-178 | 1.729183139 | 4.8251E-174 | peptidase inhibitor 3                        |
| GJB6      | 0           | 1.529250761 | 0           | gap junction protein beta 6                  |
| COL3A1    | 5.1566E-207 | 1.512937505 | 1.3519E-202 | collagen type III alpha 1 chain              |
| SPRR2A    | 3.9649E-172 | 1.46296883  | 1.0394E-167 | small proline rich protein 2A                |
| IVL       | 9.3909E-199 | 1.462579476 | 2.4619E-194 | involucrin                                   |
| TYMP      | 1.2389E-257 | 1.422061941 | 3.2479E-253 | thymidine phosphorylase                      |
| SERPINB3  | 0           | 1.401716011 | 0           | serpin family B member 3                     |
| CNFN      | 6.2572E-136 | 1.390766302 | 1.6404E-131 | cornifelin                                   |
| COL1A2    | 1.0576E-182 | 1.334461813 | 2.7725E-178 | collagen type I alpha 2 chain                |
| SERPINB4  | 5.1425E-306 | 1.311588863 | 1.3482E-301 | serpin family B member 4                     |
| SLPI      | 1.65347E-76 | 1.298328213 | 4.33473E-72 | secretory leukocyte peptidase inhibitor      |
| SERPINB13 | 0           | 1.25286817  | 0           | serpin family B member 13                    |
| RPS4Y1    | 0           | 1.221779084 | 0           | ribosomal protein S4 Y-linked 1              |
| ERO1A     | 2.0313E-115 | 1.215386273 | 5.3254E-111 | endoplasmic reticulum oxidoreductase 1 alpha |
| CD24      | 4.5276E-198 | 1.200855571 | 1.187E-193  | CD24 molecule                                |
| COL1A1    | 1.2032E-172 | 1.196780861 | 3.1543E-168 | collagen type I alpha 1 chain                |
| CSTB      | 2.7365E-150 | 1.129141447 | 7.1741E-146 | cystatin B                                   |
| CLCA2     | 3.0057E-183 | 1.108958399 | 7.8798E-179 | chloride channel accessory 2                 |
| CALML5    | 7.32772E-66 | 1.040492688 | 1.92103E-61 | calmodulin like 5                            |
| NEAT1     | 3.11719E-95 | 1.034677642 | 8.17204E-91 | nuclear paraspeckle assembly transcript 1    |
| SERPINB1  | 1.3981E-201 | 1.016753332 | 3.6653E-197 | serpin family B member 1                     |
| CTSB      | 5.2259E-293 | 0.999667545 | 1.37E-288   | cathepsin B                                  |
| GPX3      | 3.14351E-77 | 0.9980128   | 8.24103E-73 | glutathione peroxidase 3                     |
| DSG3      | 9.2887E-136 | 0.969483677 | 2.4351E-131 | desmoglein 3                                 |
| NDRG1     | 6.90792E-85 | 0.960033594 | 1.81098E-80 | N-myc downstream regulated 1                 |
| C10orf99  | 3.2038E-239 | 0.95189952  | 8.3992E-235 | chromosome 10 open reading frame 99          |
| FAM83A    | 5.1579E-230 | 0.941447852 | 1.3522E-225 | family with sequence similarity 83 member A  |
| CDH3      | 2.2235E-246 | 0.941363054 | 5.8291E-242 | cadherin 3                                   |
| UPP1      | 5.4659E-95  | 0.927583125 | 1.43294E-90 | uridine phosphorylase 1                      |
| TNC       | 2.2329E-206 | 0.927178529 | 5.8539E-202 | tenascin C                                   |
| IGFBP2    | 1.058E-123  | 0.895043096 | 2.7738E-119 | insulin like growth factor binding protein 2 |
| QSOX1     | 7.204E-180  | 0.884584076 | 1.8886E-175 | quiescin sulphydryl oxidase 1                |
| VMP1      | 8.74E-147   | 0.870245515 | 2.2913E-142 | vacuole membrane protein 1                   |
| CXCL8     | 4.4486E-90  | 0.856461156 | 1.16624E-85 | C-X-C motif chemokine ligand 8               |
| TXNDC17   | 1.2907E-105 | 0.851058267 | 3.3836E-101 | thioredoxin domain containing 17             |
| SDC1      | 1.26957E-89 | 0.848007506 | 3.3283E-85  | syndecan 1                                   |
| MPZL2     | 2.0436E-130 | 0.844300329 | 5.3576E-126 | myelin protein zero like 2                   |
| PKM       | 2.4398E-118 | 0.834773183 | 6.3961E-114 | pyruvate kinase M1/2                         |
| SCD       | 6.5347E-263 | 0.834664963 | 1.7131E-258 | stearoyl-CoA desaturase                      |
| NRIP1     | 4.0509E-268 | 0.831329699 | 1.062E-263  | nuclear receptor interacting protein 1       |
| KRT14     | 3.3623E-94  | 0.822057645 | 8.8146E-90  | keratin 14                                   |
| FAM129B   | 1.0788E-165 | 0.81640218  | 2.8281E-161 | niban apoptosis regulator 2                  |
| CA2       | 1.0833E-120 | 0.813555455 | 2.84E-116   | carbonic anhydrase 2                         |
| STEAP4    | 1.0832E-219 | 0.810766065 | 2.8398E-215 | STEAP4 metalloredutase                       |
| MALL      | 4.4186E-244 | 0.809841474 | 1.1584E-239 | mal, T cell differentiation protein like     |
| SPARC     | 2.93315E-79 | 0.799947428 | 7.68955E-75 | secreted protein acidic and cysteine rich    |
| S100A7A   | 4.8647E-158 | 0.790716881 | 1.2753E-153 | S100 calcium binding protein A7A             |
| PITX1     | 3.284E-248  | 0.784527027 | 8.6094E-244 | paired like homeodomain 1                    |
| SBSN      | 1.28292E-29 | 0.77669649  | 3.3633E-25  | suprabasin                                   |
| JUP       | 1.86221E-89 | 0.772403908 | 4.88197E-85 | junction plakoglobin                         |
| ACTN1     | 8.4202E-205 | 0.767275153 | 2.2075E-200 | actinin alpha 1                              |
| MXD1      | 4.41666E-66 | 0.766251637 | 1.15787E-61 | MAX dimerization protein 1                   |
| MYH9      | 1.6175E-152 | 0.765471248 | 4.2405E-148 | myosin heavy chain 9                         |
| GJA1      | 6.27597E-50 | 0.75363845  | 1.64531E-45 | gap junction protein alpha 1                 |
| ITGA6     | 1.57776E-28 | 0.752515411 | 4.13625E-24 | integrin subunit alpha 6                     |
| HIF1A     | 2.4595E-158 | 0.749072463 | 6.4479E-154 | hypoxia inducible factor 1 subunit alpha     |
| ITGB6     | 1.6171E-242 | 0.744262877 | 4.2395E-238 | integrin subunit beta 6                      |
| CLIP1     | 2.9497E-131 | 0.743714065 | 7.7329E-127 | CAP-Gly domain containing linker protein 1   |
| F3        | 2.7413E-139 | 0.73895578  | 7.1865E-135 | coagulation factor III, tissue factor        |

Table S6

|          |             |             |             |                                                                             |
|----------|-------------|-------------|-------------|-----------------------------------------------------------------------------|
| RHCG     | 1.4144E-122 | 0.738704028 | 3.708E-118  | Rh family C glycoprotein                                                    |
| IGFBP6   | 1.2606E-99  | 0.728376707 | 3.30471E-95 | insulin like growth factor binding protein 6                                |
| CRABP2   | 6.4017E-122 | 0.728091237 | 1.6783E-117 | cellular retinoic acid binding protein 2                                    |
| PALLD    | 2.6328E-190 | 0.720840104 | 6.902E-186  | palladin, cytoskeletal associated protein                                   |
| TPM4     | 2.3186E-137 | 0.714734472 | 6.0785E-133 | tropomyosin 4                                                               |
| CTSL     | 1.5796E-144 | 0.713199884 | 4.1411E-140 | cathepsin L                                                                 |
| LUM      | 3.40419E-85 | 0.712640816 | 8.92441E-81 | lumican                                                                     |
| IL13RA1  | 2.9469E-228 | 0.707204477 | 7.7257E-224 | interleukin 13 receptor subunit alpha 1                                     |
| PGAM1    | 3.1276E-145 | 0.691540414 | 8.1993E-141 | phosphoglycerate mutase 1                                                   |
| GRN      | 5.1556E-117 | 0.682665985 | 1.3516E-112 | granulin precursor                                                          |
| CARHSP1  | 1.7594E-181 | 0.680378372 | 4.6124E-177 | calcium regulated heat stable protein 1                                     |
| ENAH     | 6.5747E-132 | 0.67288014  | 1.7236E-127 | ENAH actin regulator                                                        |
| TMEM54   | 3.5365E-141 | 0.668555226 | 9.2714E-137 | transmembrane protein 54                                                    |
| IFI27    | 6.61553E-91 | 0.668333857 | 1.73433E-86 | interferon alpha inducible protein 27                                       |
| PKP1     | 6.19821E-32 | 0.667310736 | 1.62492E-27 | plakophilin 1                                                               |
| FLNB     | 1.3734E-104 | 0.66230129  | 3.6004E-100 | filamin B                                                                   |
| PTBP3    | 6.4991E-89  | 0.660345417 | 1.7038E-84  | polypyridine tract binding protein 3                                        |
| NDUFA4L2 | 1.7053E-86  | 0.653896587 | 4.47062E-82 | NDUFA4 mitochondrial complex associated like 2                              |
| MBOAT2   | 1.0473E-212 | 0.645495025 | 2.7456E-208 | membrane bound O-acyltransferase domain containing 2                        |
| LTB4R    | 5.0641E-106 | 0.644146522 | 1.3276E-101 | leukotriene B4 receptor                                                     |
| RAB31    | 2.3501E-267 | 0.637838771 | 6.1609E-263 | RAB31, member RAS oncogene family                                           |
| CTSC     | 4.1152E-192 | 0.637189246 | 1.0788E-187 | cathepsin C                                                                 |
| S100A16  | 8.5235E-102 | 0.63642095  | 2.23453E-97 | S100 calcium binding protein A16                                            |
| SEMA4B   | 1.2392E-167 | 0.630137177 | 3.2486E-163 | semaphorin 4B                                                               |
| LAD1     | 2.4608E-108 | 0.626857875 | 6.4513E-104 | ladinin 1                                                                   |
| CASP14   | 2.92109E-48 | 0.624478905 | 7.65794E-44 | caspase 14                                                                  |
| ENO1     | 2.53938E-87 | 0.623975897 | 6.65724E-83 | enolase 1                                                                   |
| CSTA     | 1.65074E-33 | 0.61861745  | 4.32759E-29 | cystatin A                                                                  |
| GSTP1    | 6.16359E-89 | 0.618124963 | 1.61585E-84 | glutathione S-transferase pi 1                                              |
| COL5A2   | 2.4752E-125 | 0.615532114 | 6.489E-121  | collagen type V alpha 2 chain                                               |
| IFITM2   | 1.6139E-130 | 0.607536717 | 4.231E-126  | interferon induced transmembrane protein 2                                  |
| CAPNS1   | 1.2915E-204 | 0.607477419 | 3.3859E-200 | calpain small subunit 1                                                     |
| FN1      | 7.2135E-104 | 0.607153584 | 1.8911E-99  | fibronectin 1                                                               |
| APP      | 4.9772E-120 | 0.606602648 | 1.3048E-115 | amyloid beta precursor protein                                              |
| RPL13A   | 4.8754E-132 | 0.603820194 | 1.2781E-127 | ribosomal protein L13a                                                      |
| DUOXA1   | 3.2895E-123 | 0.601397214 | 8.6238E-119 | dual oxidase maturation factor 1                                            |
| EPS8L1   | 3.6704E-101 | 0.599147239 | 9.62241E-97 | EPS8 like 1                                                                 |
| LTBP1    | 1.2325E-237 | 0.598514566 | 3.2311E-233 | latent transforming growth factor beta binding protein 1                    |
| SPINK5   | 4.92845E-36 | 0.596823647 | 1.29204E-31 | serine peptidase inhibitor, Kazal type 5                                    |
| FAT1     | 2.8501E-168 | 0.587427253 | 7.4719E-164 | FAT atypical cadherin 1                                                     |
| CD59     | 2.0835E-120 | 0.587207232 | 5.4621E-116 | CD59 molecule (CD59 blood group)                                            |
| ST14     | 2.5587E-160 | 0.584651899 | 6.7078E-156 | suppression of tumorigenicity 14                                            |
| PLCG2    | 2.41491E-33 | 0.583949392 | 6.33092E-29 | phospholipase C gamma 2                                                     |
| KRT5     | 1.12637E-46 | 0.582577252 | 2.95288E-42 | keratin 5                                                                   |
| NECTIN1  | 7.55836E-74 | 0.577380672 | 1.9815E-69  | nectin cell adhesion molecule 1                                             |
| COL12A1  | 1.3143E-112 | 0.57734201  | 3.4455E-108 | collagen type XII alpha 1 chain                                             |
| COL6A3   | 6.07285E-46 | 0.576249077 | 1.59206E-41 | collagen type VI alpha 3 chain                                              |
| FSCN1    | 6.4865E-100 | 0.572499802 | 1.70049E-95 | fascin actin-bundling protein 1                                             |
| A2ML1    | 1.54206E-68 | 0.570629699 | 4.04266E-64 | alpha-2-macroglobulin like 1                                                |
| LYPD3    | 9.37015E-36 | 0.570087268 | 2.45648E-31 | LY6/PLAUR domain containing 3                                               |
| IFI16    | 5.16178E-84 | 0.568833915 | 1.35321E-79 | interferon gamma inducible protein 16                                       |
| THBS2    | 1.72578E-95 | 0.567854342 | 4.5243E-91  | thrombospondin 2                                                            |
| GRHL1    | 4.3309E-67  | 0.556875487 | 1.13539E-62 | grainyhead like transcription factor 1                                      |
| TGM1     | 3.727E-137  | 0.556673927 | 9.7708E-133 | transglutaminase 1                                                          |
| PROM2    | 1.0216E-125 | 0.550750907 | 2.6781E-121 | prominin 2                                                                  |
| MAP4     | 1.0494E-100 | 0.54930356  | 2.75103E-96 | microtubule associated protein 4                                            |
| TRPS1    | 1.9992E-221 | 0.547971033 | 5.2412E-217 | transcriptional repressor GATA binding 1                                    |
| EREG     | 3.4065E-106 | 0.54774278  | 8.9305E-102 | epiregulin                                                                  |
| IL4R     | 4.9273E-194 | 0.543244862 | 1.2917E-189 | interleukin 4 receptor                                                      |
| HSPB1    | 7.10555E-82 | 0.542379109 | 1.86279E-77 | heat shock protein family B (small) member 1                                |
| TMEM45A  | 8.96434E-51 | 0.54193676  | 2.35009E-46 | transmembrane protein 45A                                                   |
| YWHAZ    | 1.55617E-66 | 0.541887579 | 4.07966E-62 | tyrosine 3-monooxygenase/tryptophan 5-monooxygenase activation protein zeta |
| SLC2A1   | 8.61452E-56 | 0.54099482  | 2.25838E-51 | solute carrier family 2 member 1                                            |
| KLK10    | 1.47516E-39 | 0.540703194 | 3.86728E-35 | kallikrein related peptidase 10                                             |
| PYGL     | 1.2267E-125 | 0.536083069 | 3.2159E-121 | glycogen phosphorylase L                                                    |
| GPRC5A   | 5.5861E-118 | 0.533925466 | 1.4645E-113 | G protein-coupled receptor class C group 5 member A                         |
| C12orf75 | 1.85104E-85 | 0.533912598 | 4.8527E-81  | chromosome 12 open reading frame 75                                         |
| GALNT6   | 1.0542E-226 | 0.533335073 | 2.7637E-222 | polypeptide N-acetylgalactosaminyltransferase 6                             |
| PDZK1IP1 | 2.467E-117  | 0.533022602 | 6.4674E-113 | PDZK1 interacting protein 1                                                 |
| MYO1B    | 5.285E-190  | 0.532339214 | 1.3855E-185 | myosin IB                                                                   |
| PSAP     | 1.82064E-91 | 0.525567889 | 4.77299E-87 | prosaposin                                                                  |
| RHOD     | 7.9071E-134 | 0.524768226 | 2.0729E-129 | ras homolog family member D                                                 |
| CAP1     | 2.7235E-122 | 0.521406621 | 7.1401E-118 | cyclase associated actin cytoskeleton regulatory protein 1                  |
| MTPN     | 1.8371E-105 | 0.518355339 | 4.8163E-101 | myotrophin                                                                  |
| PKP3     | 3.68142E-67 | 0.51734673  | 9.6512E-63  | plakophilin 3                                                               |
| KCNK6    | 1.9464E-115 | 0.515762201 | 5.1028E-111 | potassium two pore domain channel subfamily K member 6                      |

Table S6

|            |             |              |             |                                                                        |
|------------|-------------|--------------|-------------|------------------------------------------------------------------------|
| LAMP1      | 1.05629E-84 | 0.515386157  | 2.76916E-80 | lysosomal associated membrane protein 1                                |
| COL6A1     | 2.76743E-24 | 0.513885919  | 7.2551E-20  | collagen type VI alpha 1 chain                                         |
| PLAU       | 1.192E-115  | 0.511121675  | 3.125E-111  | plasminogen activator, urokinase                                       |
| ALDH3B2    | 4.9162E-130 | 0.509104749  | 1.2888E-125 | aldehyde dehydrogenase 3 family member B2                              |
| KIFC3      | 2.7333E-175 | 0.506727691  | 7.1655E-171 | kinesin family member C3                                               |
| DUOX1      | 1.3974E-125 | 0.504991571  | 3.6634E-121 | dual oxidase 1                                                         |
| SERINC2    | 1.1961E-173 | 0.502739161  | 3.1356E-169 | serine incorporator 2                                                  |
| IFITM3     | 9.55848E-46 | 0.501357384  | 2.50585E-41 | interferon induced transmembrane protein 3                             |
| NPEPPS     | 8.35457E-32 | 0.500285518  | 2.19023E-27 | aminopeptidase puromycin sensitive                                     |
| AMD1       | 7.61061E-46 | -0.503059562 | 1.9952E-41  | adenosylmethionine decarboxylase 1                                     |
| PPP1R15A   | 2.80135E-90 | -0.503277779 | 7.34402E-86 | protein phosphatase 1 regulatory subunit 15A                           |
| AL118516.1 | 3.08899E-58 | -0.503345385 | 8.0981E-54  |                                                                        |
| SMG1       | 1.55899E-27 | -0.504435667 | 4.08706E-23 | SMG1 nonsense mediated mRNA decay associated PI3K related kinase       |
| NOP53      | 1.71874E-89 | -0.506625513 | 4.50586E-85 | NOP53 ribosome biogenesis factor                                       |
| CYLD       | 3.49656E-22 | -0.507200598 | 9.16658E-18 | CYLD lysine 63 deubiquitinase                                          |
| NACA       | 1.4933E-118 | -0.50735502  | 3.9147E-114 | nascent polypeptide associated complex subunit alpha                   |
| RPS23      | 1.8009E-103 | -0.511577286 | 4.7211E-99  | ribosomal protein S23                                                  |
| TIPARP     | 1.23487E-45 | -0.512692306 | 3.23734E-41 | TCDD inducible poly(ADP-ribose) polymerase                             |
| ARL4A      | 4.69125E-41 | -0.513723506 | 1.22986E-36 | ADP ribosylation factor like GTPase 4A                                 |
| HLA-B      | 2.84887E-94 | -0.514682676 | 7.46859E-90 | major histocompatibility complex, class I, B                           |
| RPL5       | 2.5787E-113 | -0.515292374 | 6.7603E-109 | ribosomal protein L5                                                   |
| RPL13      | 5.2522E-121 | -0.515499309 | 1.3769E-116 | ribosomal protein L13                                                  |
| BIRC3      | 2.20169E-41 | -0.517746955 | 5.77195E-37 | baculoviral IAP repeat containing 3                                    |
| TGIF1      | 2.22137E-45 | -0.517847072 | 5.82354E-41 | TGFB induced factor homeobox 1                                         |
| CYP3A5     | 1.7742E-38  | -0.518722248 | 4.65124E-34 | cytochrome P450 family 3 subfamily A member 5                          |
| RPS7       | 2.5489E-118 | -0.519834836 | 6.6823E-114 | ribosomal protein S7                                                   |
| RPL14      | 2.8495E-126 | -0.520392715 | 7.4701E-122 | ribosomal protein L14                                                  |
| HSPA2      | 9.7506E-54  | -0.521215822 | 2.55622E-49 | heat shock protein family A (Hsp70) member 2                           |
| EPHB6      | 3.82643E-56 | -0.521960188 | 1.00314E-51 | EPH receptor B6                                                        |
| IGFBP3     | 2.50514E-15 | -0.523466113 | 6.56748E-11 | insulin like growth factor binding protein 3                           |
| TRA2B      | 2.16823E-48 | -0.523870343 | 5.68424E-44 | transformer 2 beta homolog                                             |
| RPS15      | 2.0699E-148 | -0.524040075 | 5.4264E-144 | ribosomal protein S15                                                  |
| RPL12      | 2.1763E-113 | -0.525178887 | 5.7054E-109 | ribosomal protein L12                                                  |
| SPAG9      | 2.97484E-24 | -0.529473772 | 7.79885E-20 | sperm associated antigen 9                                             |
| LAMTOR4    | 2.51688E-40 | -0.530172226 | 6.59826E-36 | late endosomal/lysosomal adaptor, MAPK and MTOR activator 4            |
| SRSF7      | 4.99335E-53 | -0.533200897 | 1.30906E-48 | serine and arginine rich splicing factor 7                             |
| BBC3       | 2.18554E-58 | -0.53443879  | 5.72961E-54 | BCL2 binding component 3                                               |
| RPL35A     | 3.7223E-125 | -0.537009186 | 9.7584E-121 | ribosomal protein L35a                                                 |
| IER2       | 2.07759E-58 | -0.538278039 | 5.4466E-54  | immediate early response 2                                             |
| BAZ1A      | 2.24847E-35 | -0.543177482 | 5.8946E-31  | bromodomain adjacent to zinc finger domain 1A                          |
| MT-ND2     | 2.82569E-94 | -0.545762973 | 7.40782E-90 | MTND2                                                                  |
| HERPUD1    | 8.0729E-56  | -0.546548655 | 2.11639E-51 | homocysteine inducible ER protein with ubiquitin like domain 1         |
| WEE1       | 1.03541E-59 | -0.546724387 | 2.71443E-55 | WEE1 G2 checkpoint kinase                                              |
| CSRNP1     | 7.50119E-62 | -0.551208405 | 1.96651E-57 | cysteine and serine rich nuclear protein 1                             |
| MT1E       | 1.71376E-60 | -0.553080687 | 4.49278E-56 | metallothionein 1E                                                     |
| RPLP1      | 3.1927E-126 | -0.555415226 | 8.3699E-122 | ribosomal protein lateral stalk subunit P1                             |
| HNRNPDL    | 4.34541E-82 | -0.557859504 | 1.13919E-77 | heterogeneous nuclear ribonucleoprotein D like                         |
| TAF4B      | 9.03134E-52 | -0.558165076 | 2.36766E-47 | TATA-box binding protein associated factor 4b                          |
| IRF1       | 6.00545E-65 | -0.561539618 | 1.57439E-60 | interferon regulatory factor 1                                         |
| ZFP36L1    | 7.27826E-81 | -0.563914006 | 1.90807E-76 | ZFP36 ring finger protein like 1                                       |
| FUS        | 2.45439E-43 | -0.566638918 | 6.43443E-39 | FUS RNA binding protein                                                |
| RPL11      | 5.3395E-164 | -0.568171477 | 1.3998E-159 | ribosomal protein L11                                                  |
| ALDH3A2    | 2.91665E-50 | -0.569563046 | 7.6463E-46  | aldehyde dehydrogenase 3 family member A2                              |
| SAP18      | 5.93495E-87 | -0.571807481 | 1.55591E-82 | Sin3A associated protein 18                                            |
| RPL32      | 2.528E-149  | -0.572215302 | 6.6275E-145 | ribosomal protein L32                                                  |
| KLF10      | 2.14533E-57 | -0.572720888 | 5.6242E-53  | Kruppel like factor 10                                                 |
| RPL34      | 3.2635E-141 | -0.573578525 | 8.5557E-137 | ribosomal protein L34                                                  |
| RND3       | 1.3735E-58  | -0.575321899 | 3.60078E-54 | Rho family GTPase 3                                                    |
| ERF        | 8.62799E-39 | -0.576483355 | 2.26191E-34 | ETS2 repressor factor                                                  |
| RPS13      | 1.026E-119  | -0.57655464  | 2.6897E-115 | ribosomal protein S13                                                  |
| RHOB       | 7.90323E-73 | -0.576907674 | 2.07191E-68 | ras homolog family member B                                            |
| LONRF1     | 7.5715E-59  | -0.577236648 | 1.98495E-54 | LON peptidase N-terminal domain and ring finger 1                      |
| PTMA       | 2.4218E-167 | -0.577923119 | 6.3491E-163 | prothymosin alpha                                                      |
| RPS15A     | 2.9567E-119 | -0.582027197 | 7.7514E-115 | ribosomal protein S15a                                                 |
| GATA3      | 1.5441E-38  | -0.583754759 | 4.04801E-34 | GATA binding protein 3                                                 |
| EIF1       | 3.26E-167   | -0.584956995 | 8.5464E-163 | eukaryotic translation initiation factor 1                             |
| H2AFZ      | 2.24752E-84 | -0.585474343 | 5.89211E-80 | H2A.Z variant histone 1                                                |
| EGR1       | 3.25742E-63 | -0.585984795 | 8.53966E-59 | early growth response 1                                                |
| FAU        | 8.346E-162  | -0.587592001 | 2.188E-157  | FAU ubiquitin like and ribosomal protein S30 fusion                    |
| FOXQ1      | 1.15217E-67 | -0.58765047  | 3.02054E-63 | forkhead box Q1                                                        |
| BCL6       | 3.96222E-56 | -0.587718741 | 1.03874E-51 | BCL6 transcription repressor                                           |
| ZFP36      | 2.00434E-98 | -0.589537299 | 5.25458E-94 | ZFP36 ring finger protein                                              |
| JUND       | 6.691E-120  | -0.594603407 | 1.7541E-115 | JunD proto-oncogene, AP-1 transcription factor subunit                 |
| CEBPD      | 2.73447E-95 | -0.595117329 | 7.16868E-91 | CCAAT enhancer binding protein delta                                   |
| H2AFX      | 2.00267E-61 | -0.595543146 | 5.25019E-57 | H2A.X variant histone                                                  |
| TAF1D      | 7.32107E-50 | -0.596530253 | 1.91929E-45 | TATA-box binding protein associated factor, RNA polymerase I subunit D |

Table S6

|           |             |              |             |                                                        |
|-----------|-------------|--------------|-------------|--------------------------------------------------------|
| TRA2A     | 1.17837E-45 | -0.598537461 | 3.08921E-41 | transformer 2 alpha homolog                            |
| B2M       | 1.178E-152  | -0.609149053 | 3.0882E-148 | beta-2-microglobulin                                   |
| ZFAS1     | 1.98E-102   | -0.609451975 | 5.19067E-98 | ZNF1 antisense RNA 1                                   |
| RPS18     | 3.9912E-155 | -0.611428196 | 1.0463E-150 | ribosomal protein S18                                  |
| CKS2      | 5.05715E-57 | -0.613162212 | 1.32578E-52 | CDC28 protein kinase regulatory subunit 2              |
| RPS21     | 1.0289E-153 | -0.613198353 | 2.6974E-149 | ribosomal protein S21                                  |
| EZR       | 8.72992E-72 | -0.614152161 | 2.28864E-67 | ezrin                                                  |
| JUN       | 2.04417E-90 | -0.620944506 | 5.359E-86   | Jun proto-oncogene, AP-1 transcription factor subunit  |
| ID4       | 7.66846E-69 | -0.621421316 | 2.01036E-64 | inhibitor of DNA binding 4, HLH protein                |
| DUSP1     | 9.01973E-73 | -0.622720914 | 2.36461E-68 | dual specificity phosphatase 1                         |
| MGP       | 2.79146E-09 | -0.628594634 | 7.3181E-05  | matrix Gla protein                                     |
| RPS12     | 1.1222E-152 | -0.633884307 | 2.9419E-148 | ribosomal protein S12                                  |
| TXNIP     | 1.52151E-69 | -0.636534656 | 3.9888E-65  | thioredoxin interacting protein                        |
| SNHG12    | 8.67738E-38 | -0.638087138 | 2.27486E-33 | small nucleolar RNA host gene 12                       |
| ZC3H12A   | 2.20171E-62 | -0.644168223 | 5.77201E-58 | zinc finger CCCH-type containing 12A                   |
| SNHG8     | 1.53465E-95 | -0.650966871 | 4.02325E-91 | small nucleolar RNA host gene 8                        |
| HEXIM1    | 6.31915E-55 | -0.652117924 | 1.65663E-50 | HEXIM P-TEFb complex subunit 1                         |
| SQSTM1    | 5.85811E-76 | -0.655564476 | 1.53576E-71 | sequestosome 1                                         |
| PER1      | 3.63447E-66 | -0.656886599 | 9.52814E-62 | period circadian regulator 1                           |
| SERTAD1   | 1.55283E-67 | -0.663936262 | 4.07089E-63 | SERTA domain containing 1                              |
| BMP2      | 4.8612E-84  | -0.669641156 | 1.27441E-79 | bone morphogenetic protein 2                           |
| RPL41     | 1.4896E-186 | -0.673478412 | 3.9051E-182 | ribosomal protein L41                                  |
| PMAIP1    | 9.9832E-72  | -0.675287393 | 2.6172E-67  | phorbol-12-myristate-13-acetate-induced protein 1      |
| ZNF217    | 1.78883E-39 | -0.678509728 | 4.68959E-35 | zinc finger protein 217                                |
| RORA      | 2.02587E-72 | -0.680198494 | 5.31102E-68 | RAR related orphan receptor A                          |
| RPL36A    | 3.8852E-114 | -0.681050076 | 1.0185E-109 | ribosomal protein L36a                                 |
| RPL30     | 6.5658E-151 | -0.681430096 | 1.7213E-146 | ribosomal protein L30                                  |
| MYC       | 3.6984E-89  | -0.682483069 | 9.69572E-85 | MYC proto-oncogene, bHLH transcription factor          |
| HNRNP11   | 1.09364E-91 | -0.691642797 | 2.8671E-87  | heterogeneous nuclear ribonucleoprotein H1             |
| MT4       | 4.80942E-62 | -0.695511157 | 1.26084E-57 | metallothionein 4                                      |
| TSC22D3   | 2.53225E-73 | -0.698759401 | 6.63854E-69 | TSC22 domain family member 3                           |
| KLF4      | 1.0214E-126 | -0.715378226 | 2.6776E-122 | Kruppel like factor 4                                  |
| DMKN      | 1.46156E-48 | -0.716486886 | 3.83162E-44 | dermokine                                              |
| MT1G      | 3.67466E-45 | -0.722558128 | 9.63349E-41 | metallothionein 1G                                     |
| RPS8      | 1.7479E-199 | -0.724541052 | 4.5822E-195 | ribosomal protein S8                                   |
| CYR61     | 1.28589E-56 | -0.729461407 | 3.3711E-52  | cellular communication network factor 1                |
| HES1      | 1.31093E-44 | -0.730055108 | 3.43673E-40 | hes family bHLH transcription factor 1                 |
| RPL26     | 6.6482E-173 | -0.735584919 | 1.7429E-168 | ribosomal protein L26                                  |
| BRD2      | 1.79774E-93 | -0.738793145 | 4.71295E-89 | bromodomain containing 2                               |
| FOSB      | 4.2254E-105 | -0.746290065 | 1.1077E-100 | FosB proto-oncogene, AP-1 transcription factor subunit |
| GADD45B   | 8.31613E-92 | -0.748383577 | 2.18016E-87 | growth arrest and DNA damage inducible beta            |
| RSRP1     | 5.0941E-120 | -0.756372179 | 1.3355E-115 | arginine and serine rich protein 1                     |
| LGALS3    | 2.7382E-138 | -0.760568414 | 7.1785E-134 | galectin 3                                             |
| RPS26     | 5.577E-136  | -0.778813344 | 1.4621E-131 | ribosomal protein S26                                  |
| PNRC1     | 1.5331E-176 | -0.779350197 | 4.0191E-172 | proline rich nuclear receptor coactivator 1            |
| JUNB      | 1.2714E-156 | -0.793806612 | 3.3332E-152 | JunB proto-oncogene, AP-1 transcription factor subunit |
| INTS6     | 6.57809E-81 | -0.795123213 | 1.7245E-76  | integrator complex subunit 6                           |
| BTG1      | 2.4779E-149 | -0.806175918 | 6.4961E-145 | BTG anti-proliferation factor 1                        |
| NRARP     | 2.69063E-73 | -0.808098065 | 7.05376E-69 | NOTCH regulated ankyrin repeat protein                 |
| ID3       | 5.31406E-98 | -0.811359159 | 1.39313E-93 | inhibitor of DNA binding 3, HLH protein                |
| TLE4      | 5.19912E-86 | -0.812287035 | 1.363E-81   | TLE family member 4, transcriptional corepressor       |
| PPP1R10   | 8.28704E-88 | -0.817260224 | 2.17253E-83 | protein phosphatase 1 regulatory subunit 10            |
| ERRF1     | 3.40866E-87 | -0.836686914 | 8.93613E-83 | ERBB receptor feedback inhibitor 1                     |
| MTRNR2L12 | 1.33E-111   | -0.839168233 | 3.4866E-107 | MT-RNR2 like 12                                        |
| CLDN1     | 3.88829E-93 | -0.83934147  | 1.01935E-88 | claudin 1                                              |
| CXCL14    | 7.9817E-121 | -0.839839757 | 2.0925E-116 | C-X-C motif chemokine ligand 14                        |
| IFRD1     | 3.8364E-108 | -0.848837181 | 1.0058E-103 | interferon related developmental regulator 1           |
| TNFAIP3   | 9.4983E-134 | -0.850253048 | 2.4901E-129 | TNF alpha induced protein 3                            |
| SERPINB2  | 1.01258E-76 | -0.853793054 | 2.65457E-72 | serpin family B member 2                               |
| MT1X      | 4.0301E-127 | -0.872980474 | 1.0565E-122 | metallothionein 1X                                     |
| RPS4X     | 1.8621E-234 | -0.883974019 | 4.8817E-230 | ribosomal protein S4 X-linked                          |
| MFSD2A    | 3.7304E-133 | -0.886994315 | 9.7796E-129 | major facilitator superfamily domain containing 2A     |
| DNAJA1    | 1.5178E-152 | -0.893516447 | 3.979E-148  | DnaJ heat shock protein family (Hsp40) member A1       |
| SYT8      | 1.95676E-84 | -0.89855341  | 5.12983E-80 | synaptotagmin 8                                        |
| CCND1     | 3.4308E-108 | -0.899759398 | 8.9941E-104 | cyclin D1                                              |
| NR4A1     | 1.8102E-126 | -0.916004374 | 4.7455E-122 | nuclear receptor subfamily 4 group A member 1          |
| GADD45A   | 7.21647E-97 | -0.9844507   | 1.89187E-92 | growth arrest and DNA damage inducible alpha           |
| ADRB2     | 6.6723E-134 | -1.02940421  | 1.7492E-129 | adrenoceptor beta 2                                    |
| ATF3      | 8.5398E-175 | -1.040787576 | 2.2388E-170 | activating transcription factor 3                      |
| RPS10     | 4.3674E-201 | -1.070297561 | 1.145E-196  | ribosomal protein S10                                  |
| NFKBIA    | 8.4109E-267 | -1.25550235  | 2.205E-262  | NFKB inhibitor alpha                                   |
| KRT15     | 5.89049E-24 | -1.297195822 | 1.54425E-19 | keratin 15                                             |
| LGALS7B   | 2.1123E-112 | -1.309599472 | 5.5375E-108 | galectin 7                                             |
| XIST      | 8.4249E-269 | -1.322304647 | 2.2087E-264 | X inactive specific transcript                         |
| CFD       | 3.97929E-44 | -1.359117884 | 1.04321E-39 | complement factor D                                    |
| APOE      | 3.3908E-173 | -1.398278844 | 8.8894E-169 | apolipoprotein E                                       |

Table S6

|       |             |              |            |                               |
|-------|-------------|--------------|------------|-------------------------------|
| CCL27 | 1.3404E-166 | -1.800913472 | 3.514E-162 | C-C motif chemokine ligand 27 |
|-------|-------------|--------------|------------|-------------------------------|

**Table S7: Demographics of subjects with chronic wounds**

| <b>ID</b> | <b>Age</b> | <b>Gender</b> | <b>BMI</b> | <b>Ethnicity</b> | <b>wound location</b> |
|-----------|------------|---------------|------------|------------------|-----------------------|
| W1        | 58         | Female        | 23.7       | Caucasian        | coccyx                |
| W2        | 39         | Male          | 23.2       | Caucasian        | sacrum                |
| W3        | 60         | Female        | 28         | Caucasian        | sternum               |
| W4        | 54         | Female        | 37.1       | Caucasian        | abdomen               |
| W5        | 31         | Female        | 41.79      | Caucasian        | left axilla           |
| W6        | 33         | Male          | 27.8       | Caucasian        | abdomen               |
| W7        | 58         | Female        | 40.3       | Caucasian        | abdomen               |
| W8        | 51         | Male          | 22.7       | Caucasian        | sacrum                |
| W9        | 58         | Male          | 26.4       | African American | inner right thigh     |
| W10       | 78         | Male          | 22.2       | Caucasian        | sacrum                |
| W11       | 49         | Male          | 33.3       | Not available    | chest                 |
| W12       | 46         | Female        | 30.7       | African American | right pelvis          |
| Sc_W1     | 39         | Male          | 15.8       | Caucasian        | ischial Tuberosity    |
| Sc_W2     | 69         | Male          | 34.3       | African American | right heel            |
| Sc_W3     | 42         | Female        | 29.7       | Caucasian        | right ischial         |

**Table S8: Primers used for this study**

| <b>Primer</b> | <b>Sequence</b>                      |
|---------------|--------------------------------------|
| h_TP53_F      | 5' - GAA CAA GTT GGC CTG CAC TG - 3' |
| h_TP53_R      | 5' - GAA GTG GGC CCC TAC CTA GA - 3' |
| h_P73_F       | 5' - CTG TCA TCC CCT CCA ACA CC - 3' |
| h_P73_R       | 5' - ACG TGC TCC GCT TTC TTG TA - 3' |
| h_HDAC1_FP    | 5'-TGT CGG AGT ACA GCA AGC AG-3'     |
| h_HDAC1_RP    | 5'-TGC CTC GGA CTT CTT TGC AT-3'     |
| h_SIRT1_FP    | 5' - CGC TGG CCG ACA ACT TGT A- 3'   |
| h_SIRT1_RP    | 5'-CAT GTG AGG CTC TAT CCT CCT-3'    |
| h_18S_FP      | 5'-GTA ACC CGT TGA ACC CCA TT-3'     |
| h_18S_RP      | 5'-CCA TCC AAT CGG TAG TAG CG-3'     |
